# Supplementary material for: The shape of educational inequality
Source: PubMed Central journal article supplement (PMC7363455; doi:10.1126/sciadv.aaz5954), 2020-07-15
Supplement: aaz5954_SM.pdf [file aaz5954_SM.pdf]

## Supplementary Materials for

### **The shape of educational inequality**

Christopher L. Quarles\*, Ceren Budak, Paul Resnick

\*Corresponding author. Email: [chrisquarles@gmail.com](mailto:chrisquarles@gmail.com)

Published 15 July 2020, *Sci. Adv.* **6**, eaaz5954 (2020)

DOI: [10.1126/sciadv.aaz5954](https://doi.org/10.1126/sciadv.aaz5954)

#### **This PDF file includes:**

Sections S1 to S5

Figs. S1 to S7

Tables S1 and S2

References

## Section S1. Measurement of Student Capital

There are conceptual reasons for why “credits that a student could earn if they had to” is a good way to measure student capital. For this, it is useful to look at the process of earning a degree through a student’s eyes. Attending college is a large commitment. It is reasonable to assume that students who have decided to earn a degree are marshalling all the resources they reasonably can towards making progress. Furthermore, if we think about a student’s own judgment of what progress toward a degree means, it likely consists of taking classes and earning credits until they have earned enough to graduate. So it is reasonable that a student would put as many of their own resources as reasonably possible towards earning credits. Therefore, the number of credits they could earn makes sense as a measure of their student capital.

Note that our metric doesn’t depend on the *speed* at which students earned credits. Unlike popular conceptions of full-time college students at highly selective universities, community college students have varied and chaotic enrollment patterns. Most are enrolled part-time at some point in their college career, and many take at least one term off before returning to school (55). We assume that students marshal the resources they need to be successful at the best speed that they can. This just takes longer for some students than for others. Students with limited resources may need to take time off to, for instance, work to earn more money or address the challenges of life.

## Section S2. Modeling Distributions & Inequality

We can think of inequality as the unequal distribution of a certain resource, such as income, wealth, social capital, educational success, high-speed internet access or health insurance. It is worth looking at how inequality is distributed in other areas where quantitative, fine-grained data is available. Income is probably the most heavily studied type of inequality, because tax data is readily available in many countries. A wide variety of parametric models have been used to describe income distributions including the Weibull, Dagum, and Singh-Maddala distributions (56). Generally speaking, models with more parameters will tend to fit data better at the cost of interpretability. Given von Neumann’s statement that he could fit an elephant using four parameters (57), a practical approach to understanding distributions might be to find the simplest model that one can meaningfully interpret and use (58). In studying Lorenz curves of income, (59) found a one parameter family of Lamé curves and used it to build a “trickle-up” explanation of income growth. Because different forces might dominate different ranges of a distribution of inequality, another method is to focus on certain segments of the distribution. Probability distributions of income seem to be exponential between the 10th and 90th percentile, and look like a power law for high earners (24, 49). Nirei & Souma (24) explained this two-tier structure using a model which combined linear wage growth with

exponential asset growth. In a more information-theoretic approach, Dragulescu & Yakovenko (34) derive the exponential portion of the distribution by maximizing entropy subject to the conservation of money.

Wealth distributions have also been studied, though less deeply because of the lack of records on wealth. It's clear that the high end of the wealth distribution follows a power law (49, 60, 61), consistent with a rich-get-richer mechanism. There is evidence that some portion of the middle wealth levels behave exponentially. However, this varies widely by country. In many countries, the net wealth owned by the bottom 50% of the population is near zero, or even negative (62). This likely relates to the fact that survival without wealth is easier than survival with no income.

Another type of inequality involves social capital. Most people are familiar with the incredible popularity of certain social media stars. At the higher end, social media follower distributions tend to follow heavy-tailed behavior found in power law and log-normal distributions (47, 63), consistent with a rich-get-richer effect (64). Though some distributions of social network degree follow a power law with exponential cutoff (65). In this context, social media networks are informational networks, where the marginal cost of an additional follower is effectively zero, and the social capital might be considered as one's ability to be heard. In cases where individuals need to expend time or resources to maintain friendships, there are limits on the number of friends a single individual has (66, 67).

### Section S3. More on Data and Methods

**Fractional Credit Values** To ensure that we could use discrete distribution functions in R, we rounded all fractional credit values to the nearest integer (<0.4% of data points).

**Estimate of G** We could estimate the best fit parameter for each possible distribution of student capital without estimating distributions of transfer and graduation. However, to validate the data, we needed to estimate the distribution of the points where students would graduate or transfer. Because of the non-regular nature of student graduation patterns, we fit this distribution at each credit level individually. Specifically, if  $G_k$  is the probability that a randomly drawn student in a given group would graduate at exactly  $k$  credits, we estimated each  $G_k$  as its own parameter. To do this, we numerically maximized the following term in the log-likelihood function. This was the term that only involved  $G_k$ .

$$\log \mathcal{L}_G = \left[ \sum_i (1 - \tilde{y}_i) \log G_{x_i} + \tilde{y}_i \log \left( \sum_{k=x_i+1}^{\infty} G_k \right) \right]$$

Because most classes in the Washington community college system were 5 credit classes, the inferred probability tends to be larger when  $k$  is a multiple of 5. This distribution was done for

each cohort individually. The inferred values for the combined set of students from all 140 cohorts is shown in Figure S5. To aid interpretation, the same values smoothed by a spline are shown in Figure S6.

**Parametric Validation using QQ Plots** We checked each parametric model – normal, exponential, and power law models – using the following procedure:

1. Fit the model to a given dataset, including finding the parameters for both the distribution of student capital  $Y_k$  and the distribution of success points,  $G_k$ .
2. Generate a synthetic dataset using the fitted parameters.
3. Compare the synthetic dataset to the real dataset using QQ plots. If the model is a good fit, then the two models should compare well.

A visual description of this process is shown in Figure S7. The QQ plots show that the exponential models fit very well, and that the power laws don't fit at all. A full set of QQ plots, one for each college-year cohort, is shown at the end of the appendix. Some cohorts fit the exponential model worse than others. Future work might consider exploring the source of this variation.

#### **Section S4. A Note on the Normal Distribution / Cognitive Ability Model**

In our inference of the cognitive ability model, we found that the inferred mean of the truncated normal distributions were all  $\hat{\mu} = 1$ . This was also the minimum value that our algorithm would allow. To be thorough, we explored the case where the mean was zero or negative. We consider a couple cases.

First, assume that the mean is taken over all degree-seeking transfer students who started a given community college during the same year, and that the left tail of the distribution is just those students who enrolled but didn't earn credits. We would then expect that at least half of students who enrolled did not earn any credits. In our initial data cleaning, we had excluded all students who had enrolled for a positive number of credits, but earned none. We did this because, anecdotally, we had been told that many of those students mistakenly claimed to be degree-seeking transfer students on their application. So we went back and re-included those students in the cohort. Students who enrolled and earned 0 credits made up 7.2% of this larger population of students. This is far less than half, which is not consistent with  $\hat{\mu} \leq 0$ .

One might also claim that the entire not-necessarily-college-going population is normally distributed, and that the students who actually earn credits in community college are in the right tail of this distribution. Despite the fact that the open-access nature of community college admissions and the incredible diversity of community college students calls this claim into strong doubt, we explore this hypothesis numerically. Unfortunately, our numerical algorithm for optimizing log-likelihood was not designed for this range. So, for two cohorts we graphically

found the maximum of the log-likelihood function using this model. For College 20 Cohort 1, we found a maximum likelihood at  $\hat{\mu} = -2148$ ,  $\hat{\sigma} = 441$ . For College 111, Cohort 4, we found a maximum likelihood at  $\hat{\mu} = -3061$ ,  $\hat{\sigma} = 629$ . Both of these statistics would suggest that community college students who earned any credits were 4.8 standard deviations above the mean and in the top 0.00006% of the population. Since the population of Washington is roughly 7.5 million people, this would imply that only 4 people in the state could earn college credits.

This exploration shows us that the log-likelihood function of this model is really pathological in this case, and does not lead to interpretable results. The cognitive ability model just does not make sense when it comes to earning credits in community college.

### **Section S5. The Exponential Distribution as it Arises from Bernoulli Trials**

Entropy maximization is not the only way that exponential distributions arise. Another method for generating exponential distributions comes from repeated Bernoulli trials. This is similar to the mechanism involved in radioactive decay. We explain this idea here, and then explain why we think it doesn't approximate student capital. Consider a large group of students with identical coins. The coins have probability  $q$  of coming up tails, and  $1 - q$  of coming up heads. If a coin comes up tails, they add one credit to their record and flip again. If the coin comes up heads, they stop flipping and leave school. Then the probability of any student earning exactly  $k$  credits will be the exponential distribution  $P(k) = (1 - q)q^k$ .

One might imagine a group of students working hard at school with random life events causing them to drop out. If students were homogeneous, so that every student's probability of having a catastrophic life event was the same, then this model would be a good one. Each coin flip would be equivalent to an opportunity to have a catastrophic event happen to a student. However, we know that students are nowhere near homogeneous. Community college students are quite diverse in their backgrounds and preparation. Importantly, we can predict, with some accuracy, who will be successful in school (68). So this model for generating our observed distributions of student capital just doesn't work.

**Fig. S1.** Distributions of credits earned by college. (College 30 through College 300)

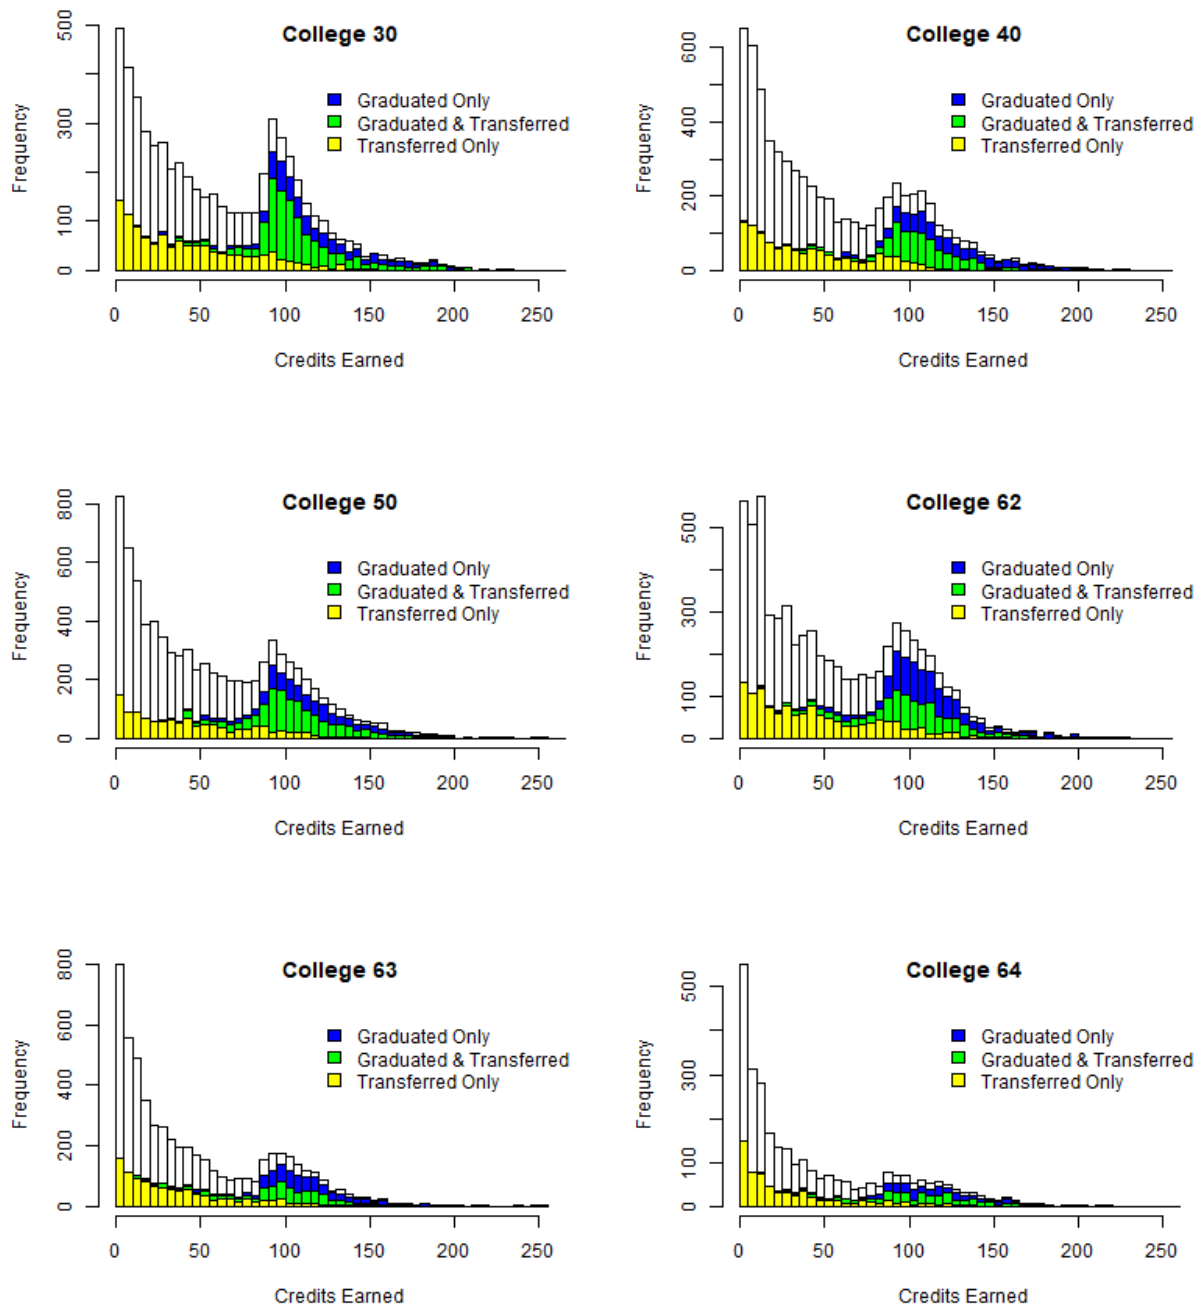

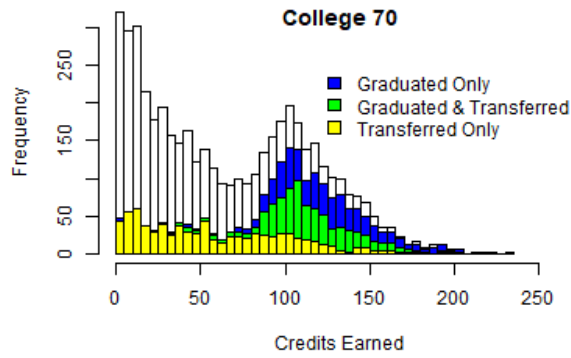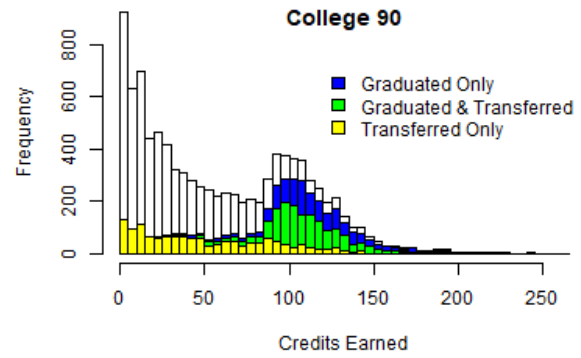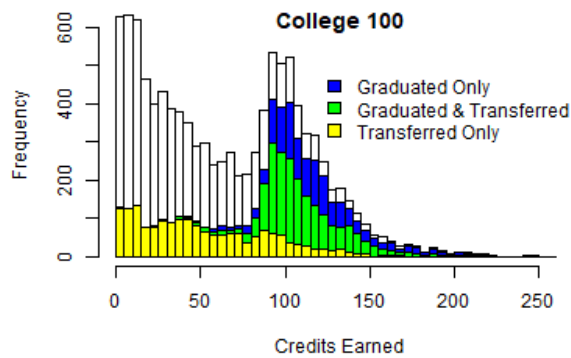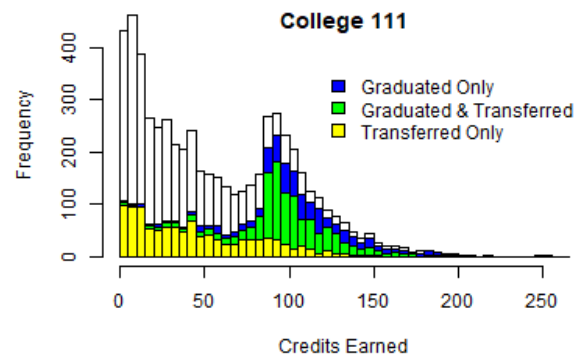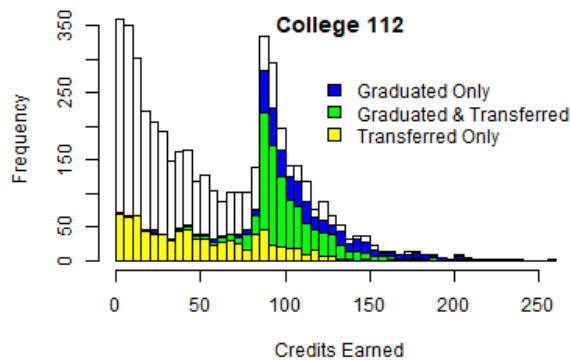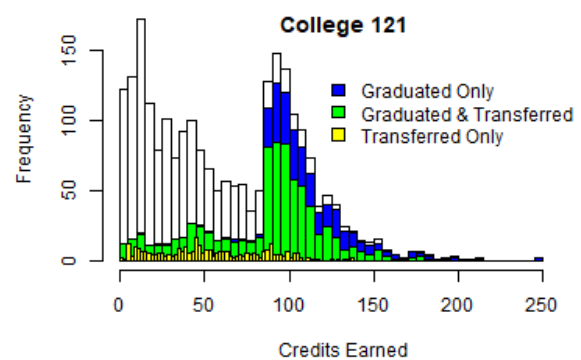

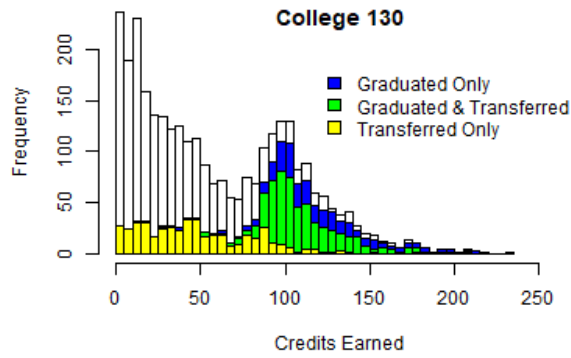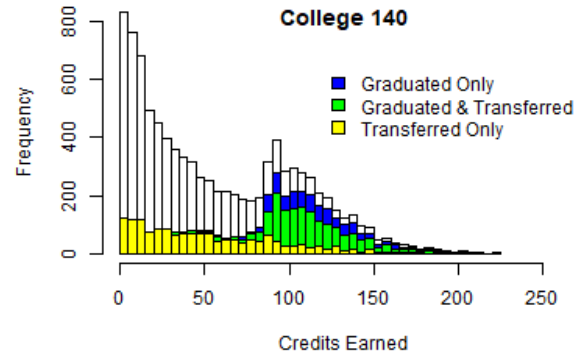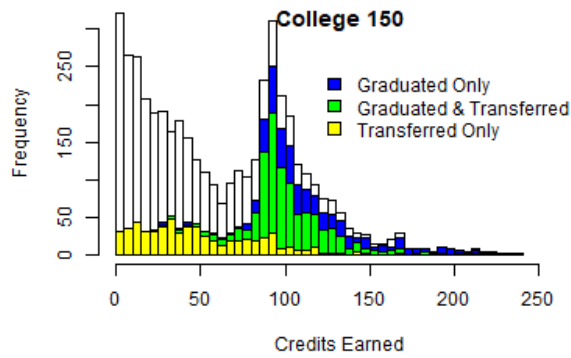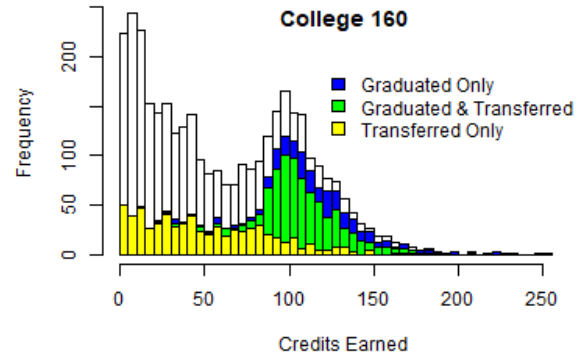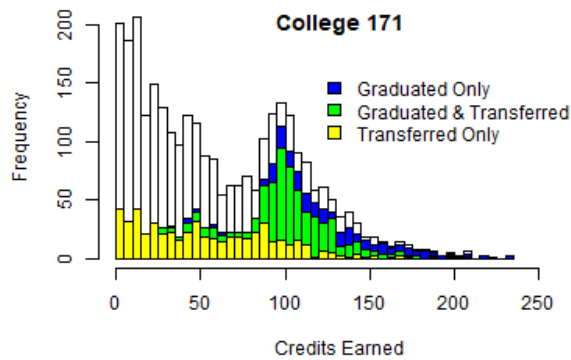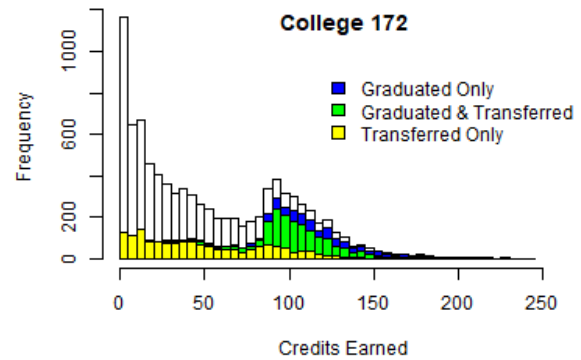



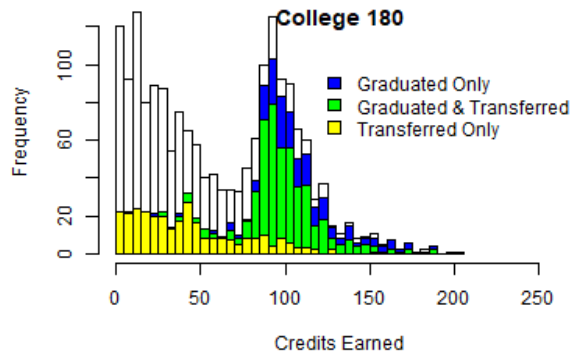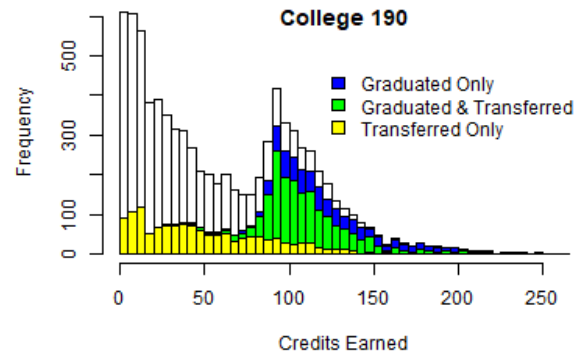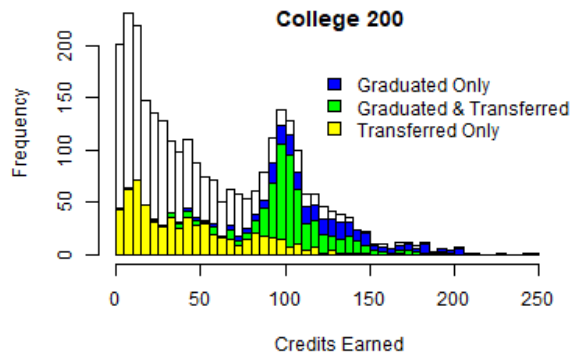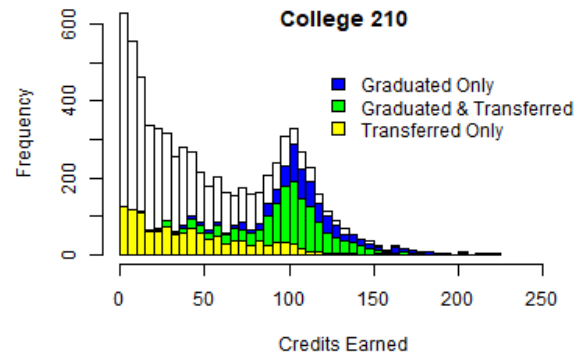

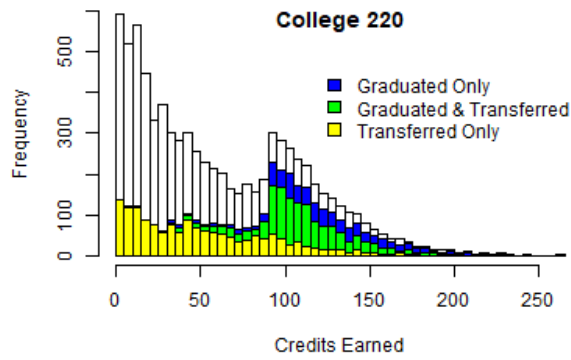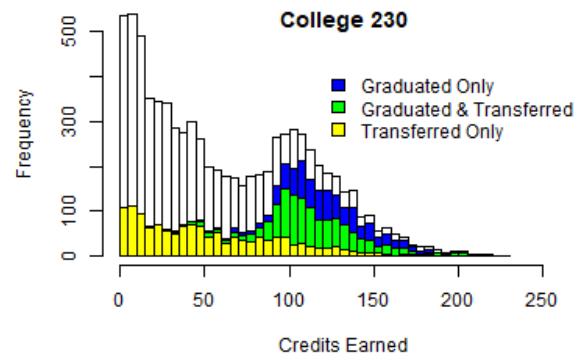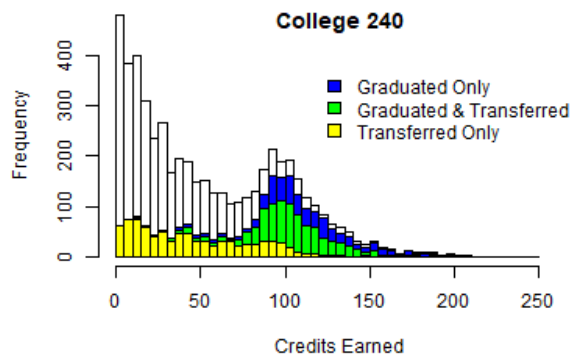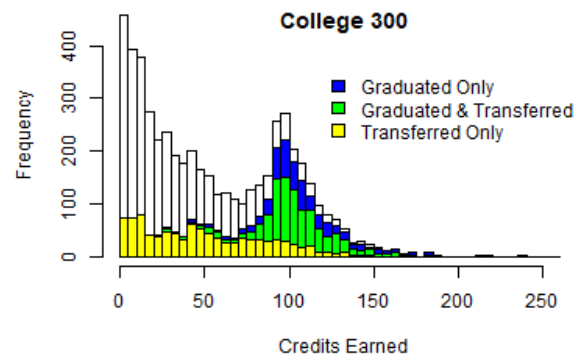

**Fig. S2.** QQ plots for each cohort and model in the analysis. Each cohort consists of all students who started at one college in a single year. (College 10 Cohort 1 through College 300 Cohort 5)

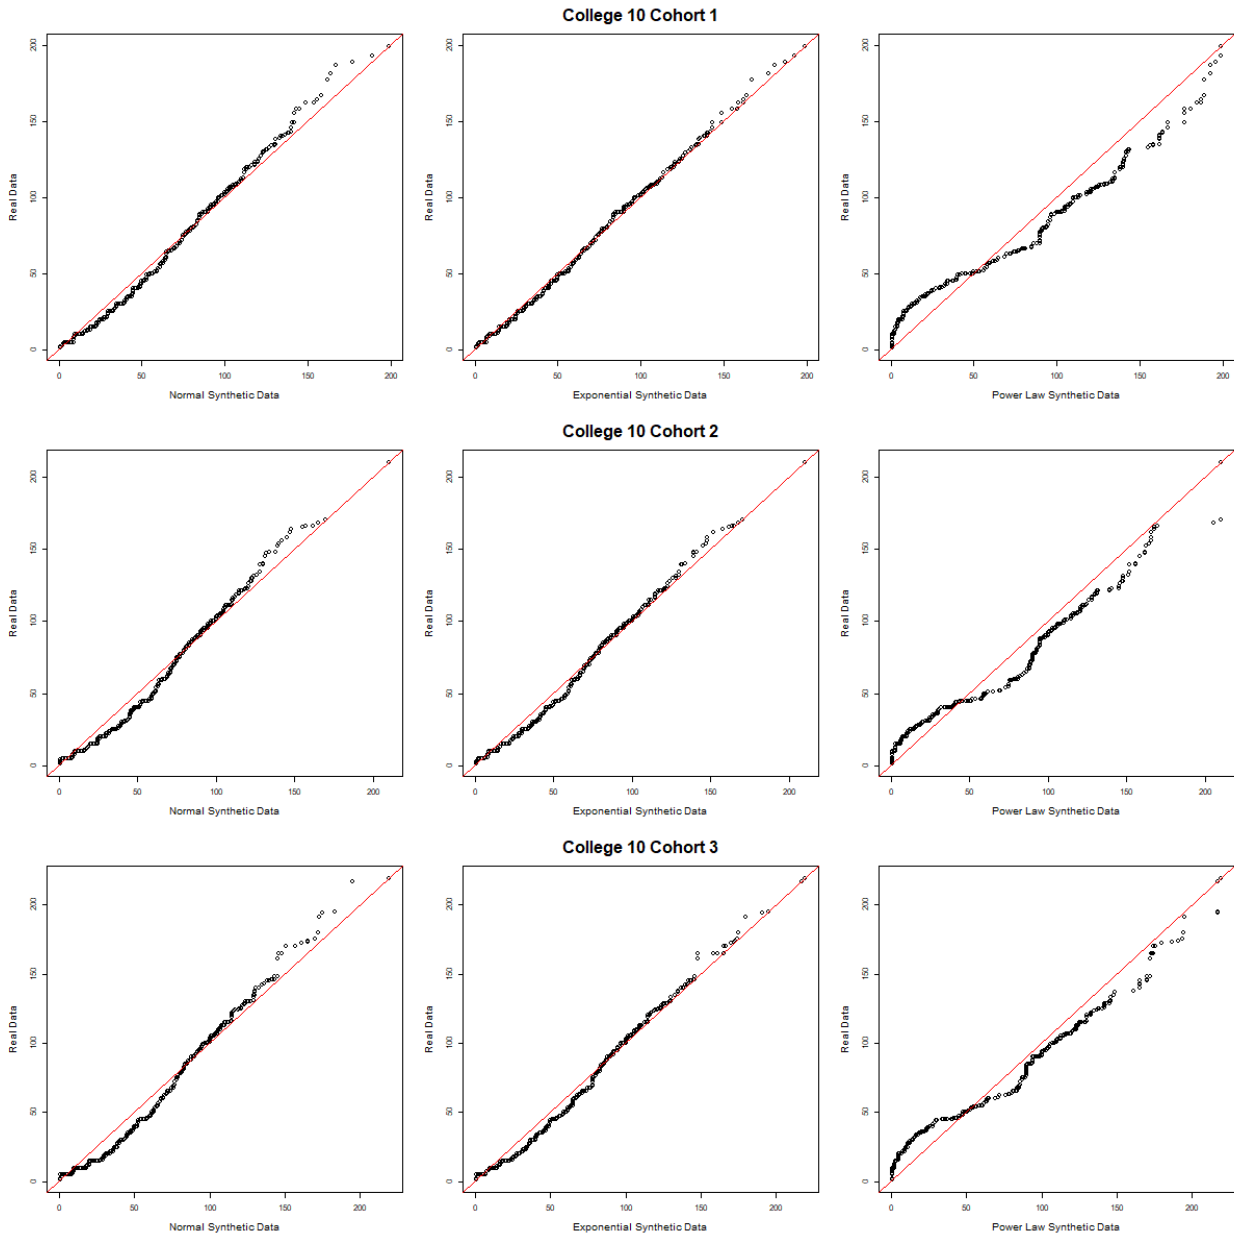

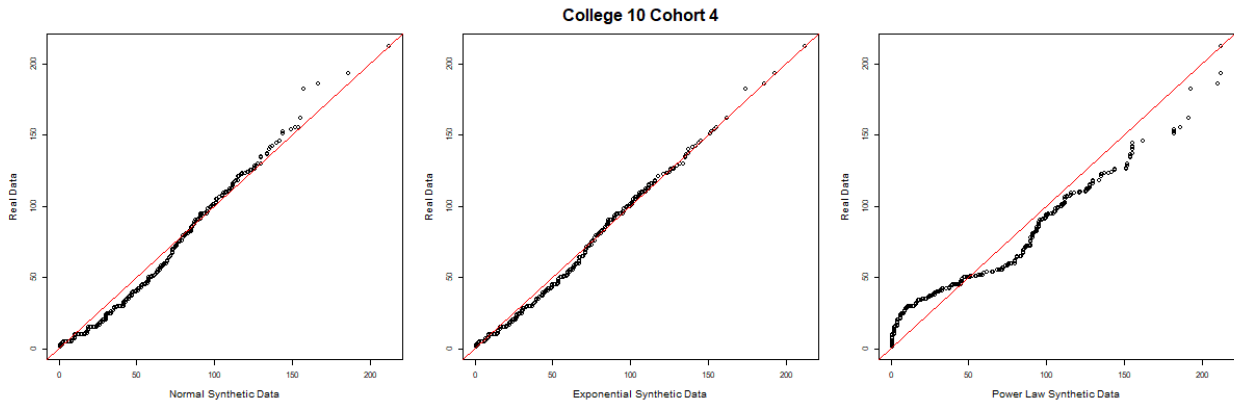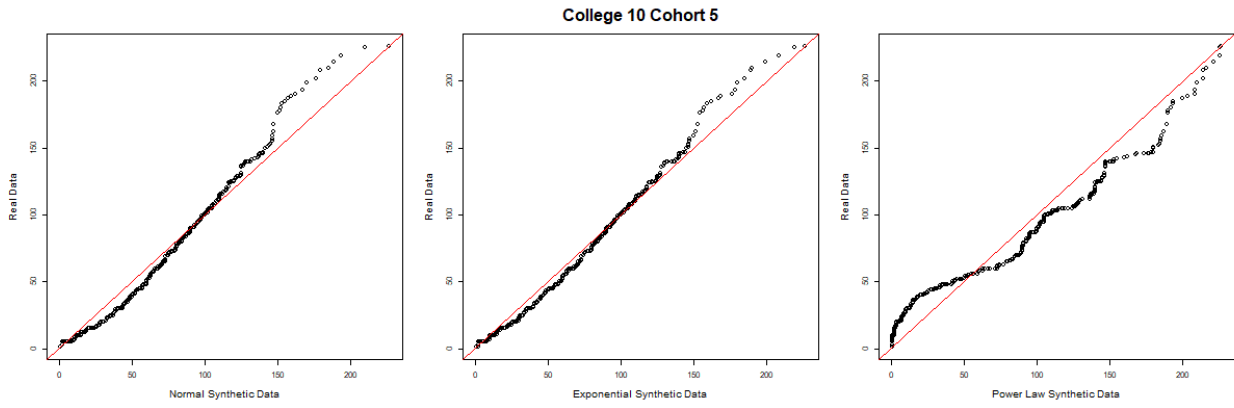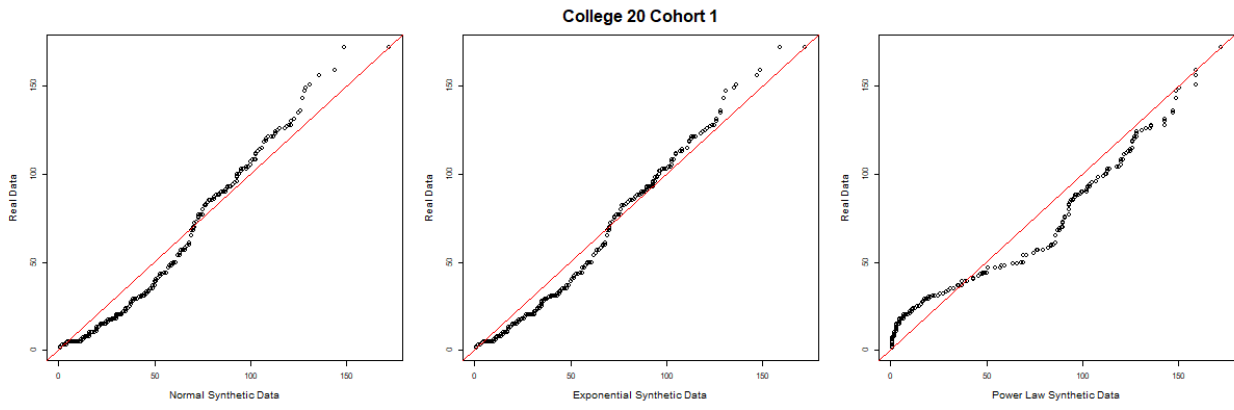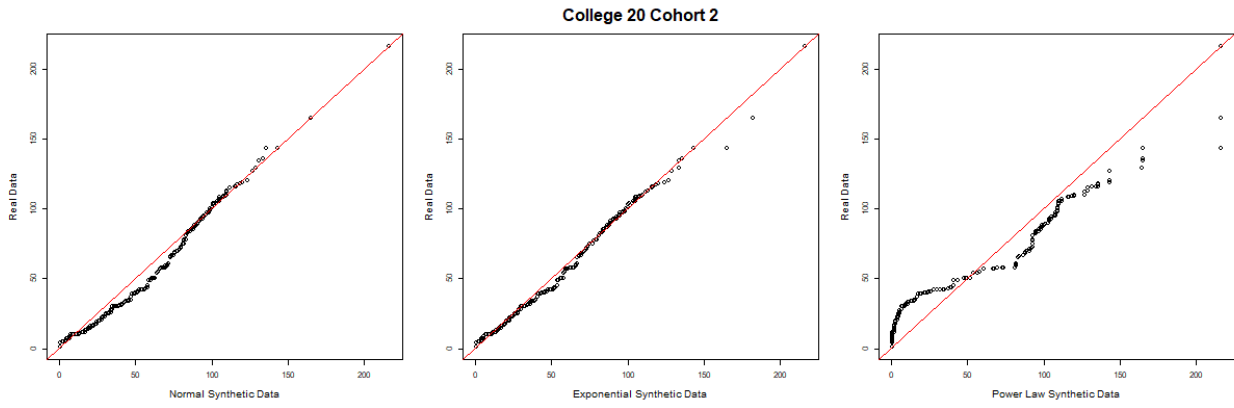

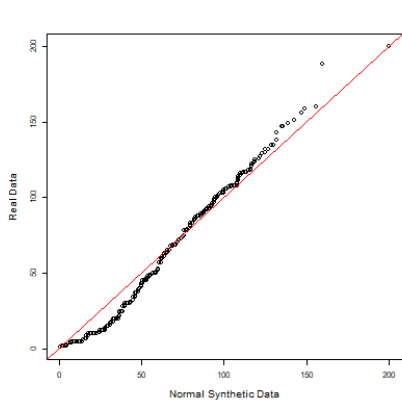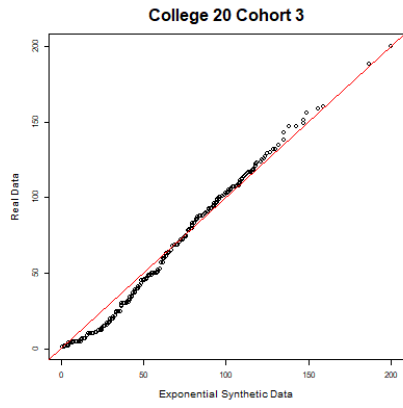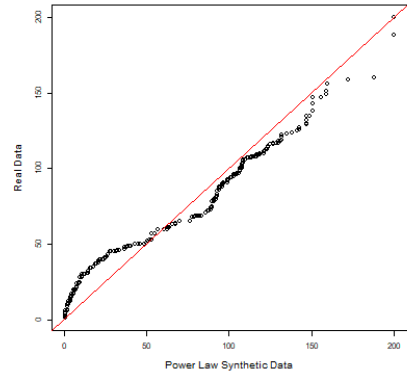

**College 20 Cohort 3**

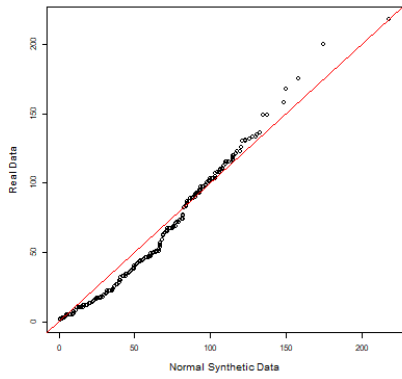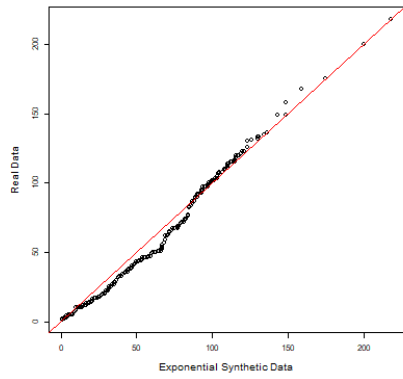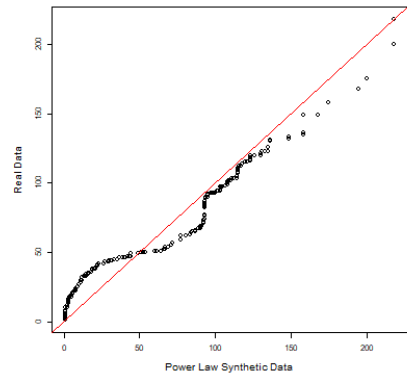

**College 20 Cohort 4**

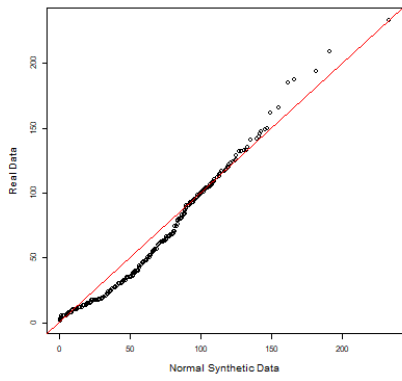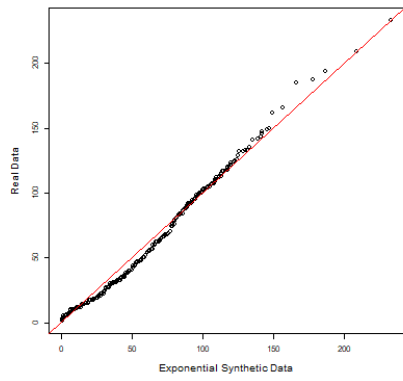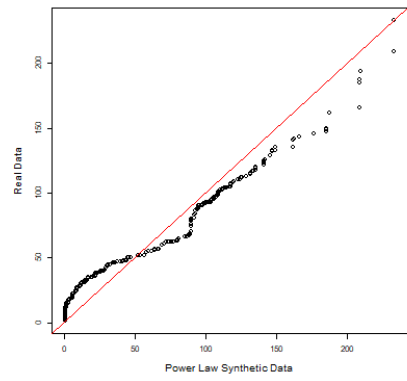

**College 20 Cohort 5**

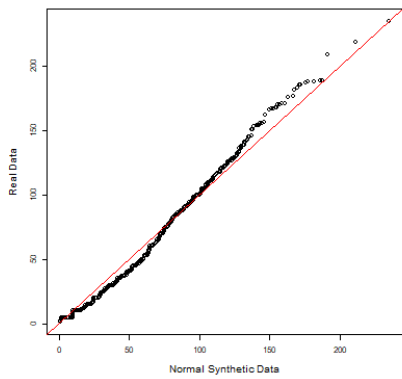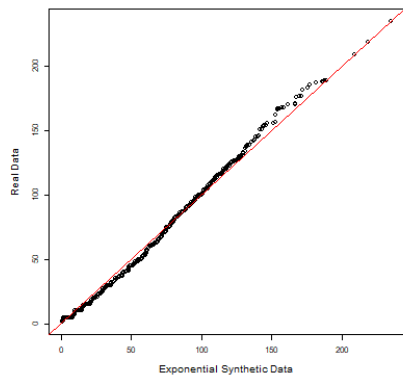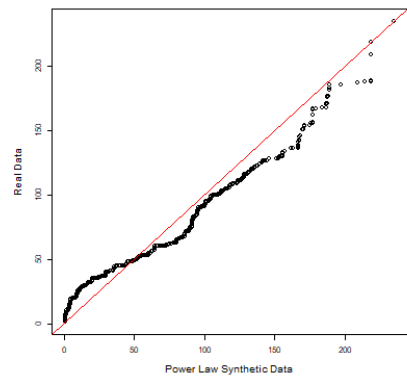

**College 30 Cohort 1**

**College 30 Cohort 2**

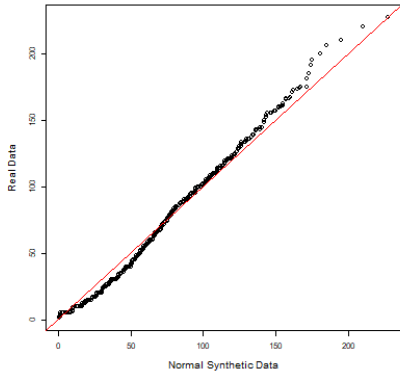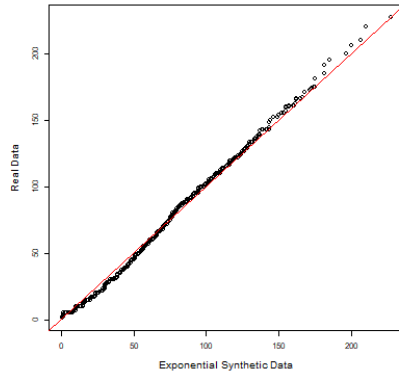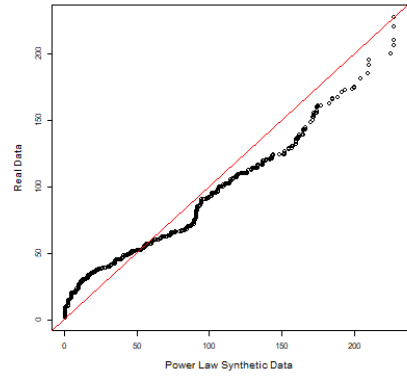

**College 30 Cohort 3**

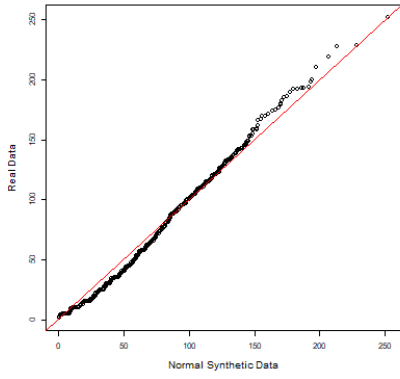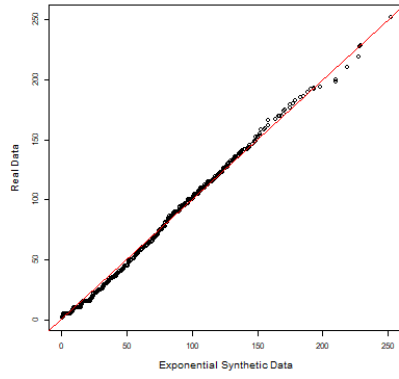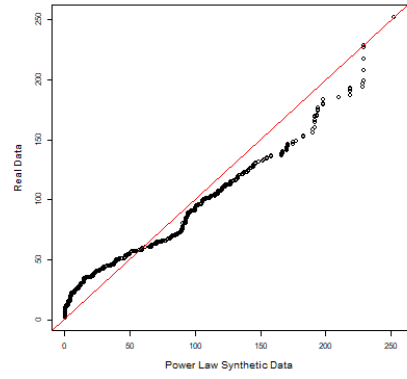

**College 30 Cohort 4**

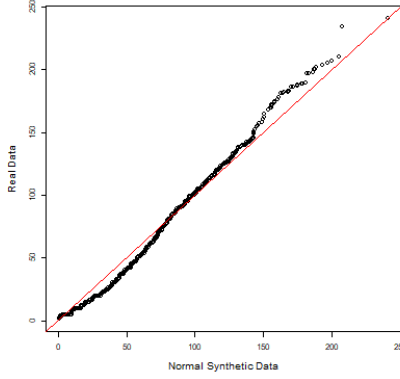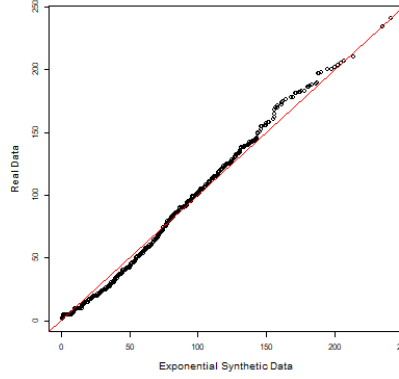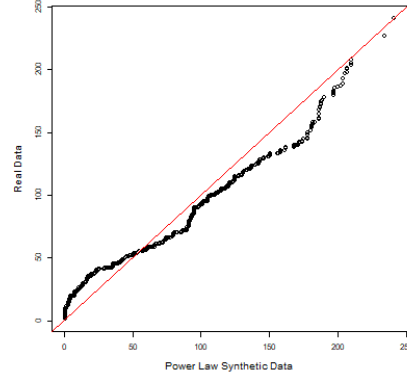

**College 30 Cohort 5**

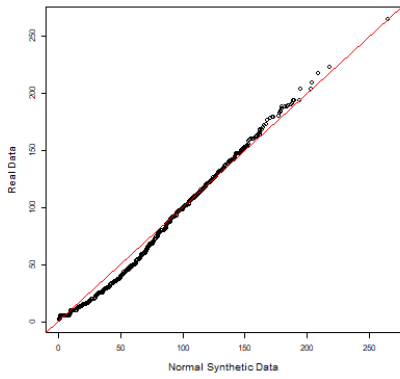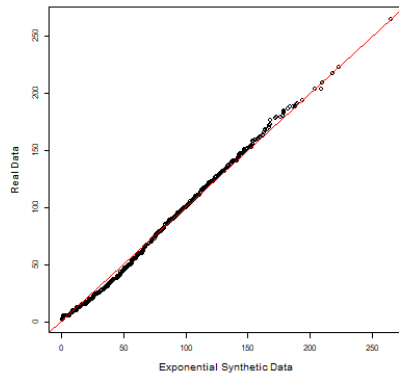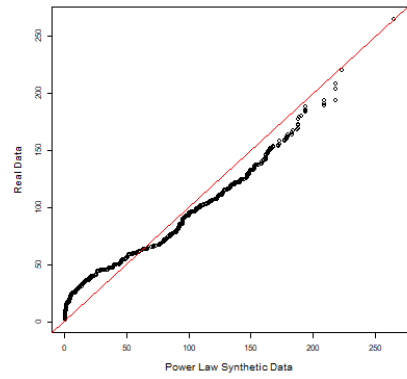

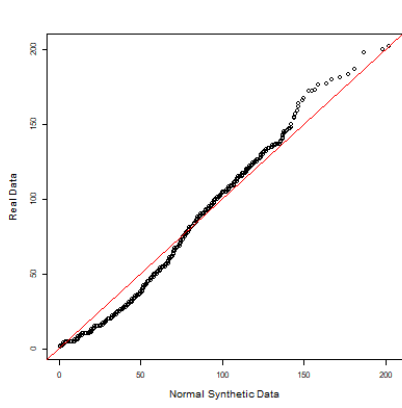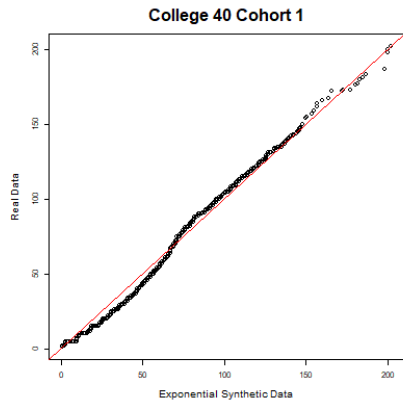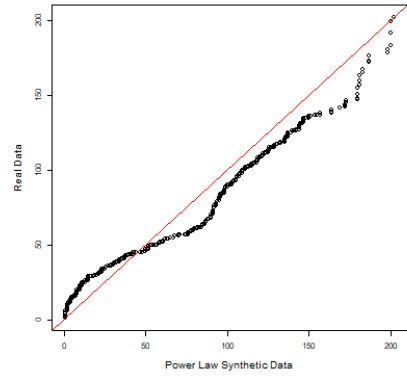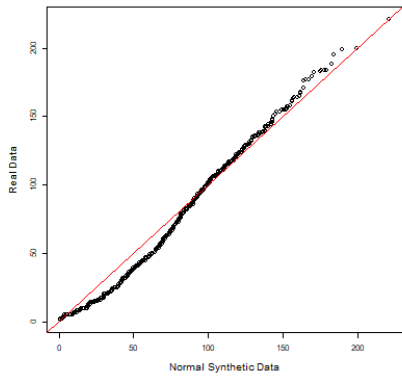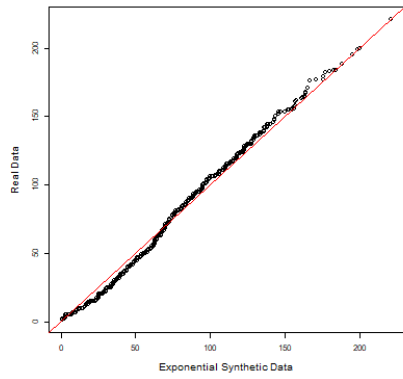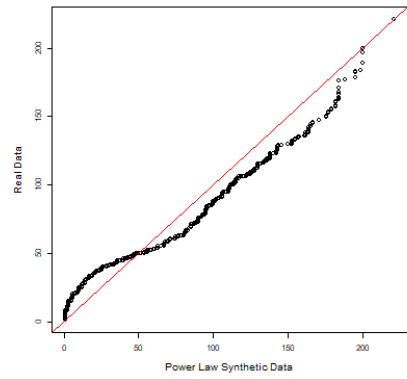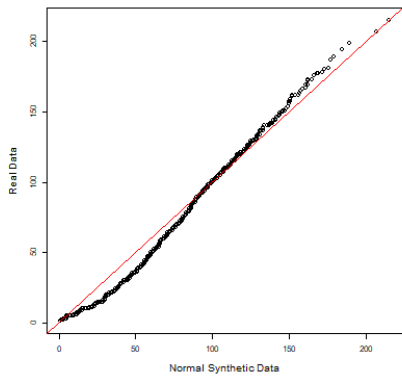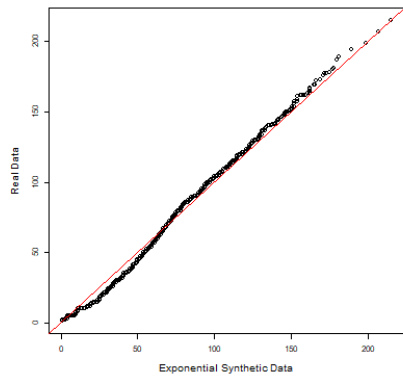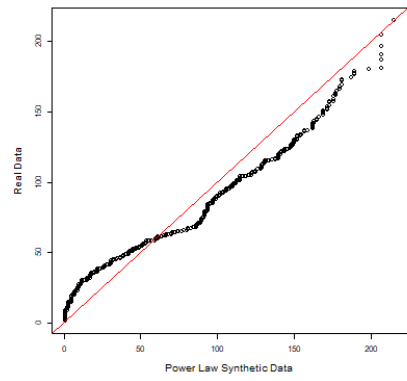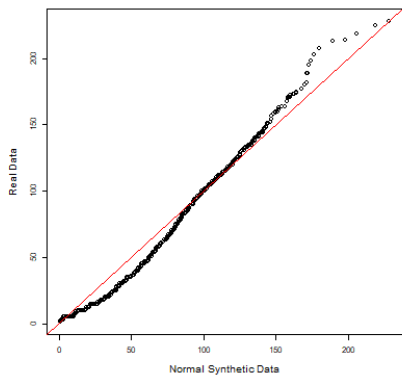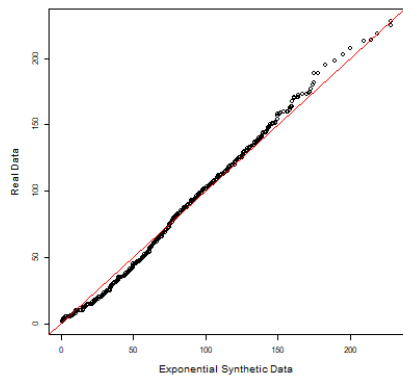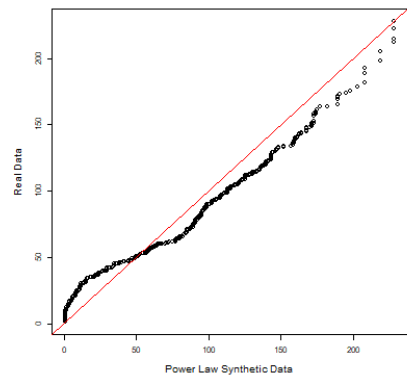

**College 40 Cohort 5**

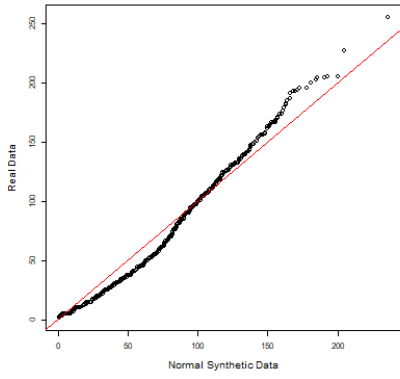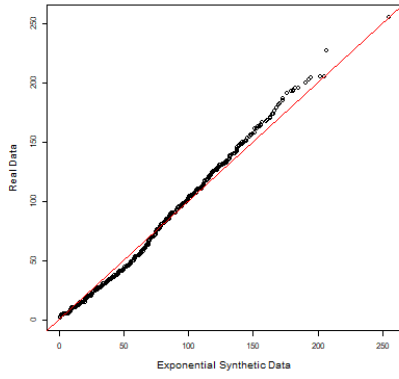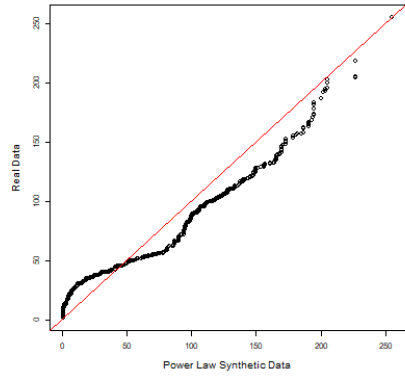

**College 50 Cohort 1**

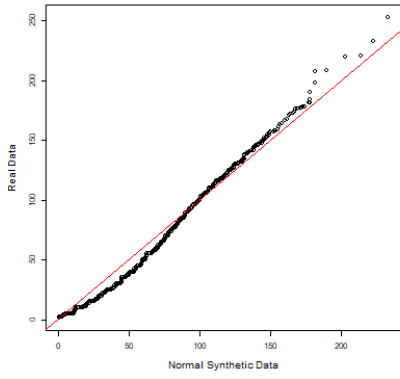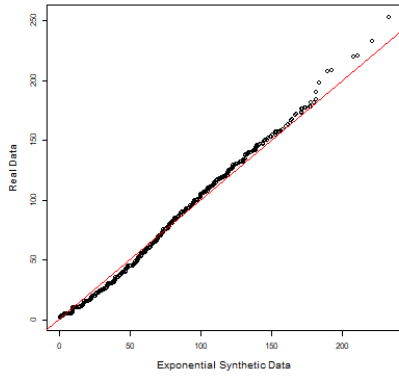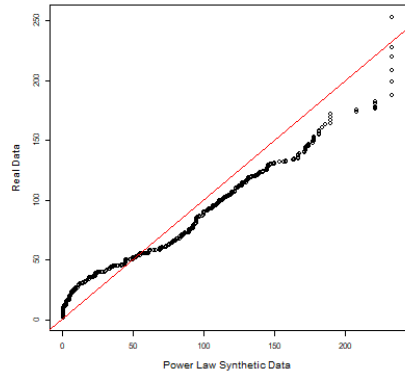

**College 50 Cohort 2**

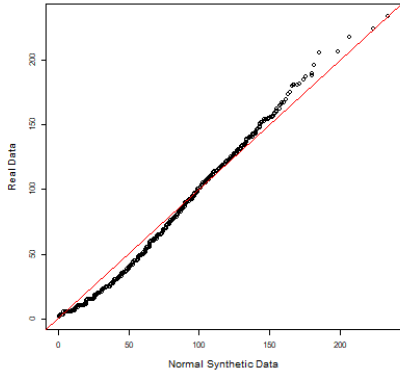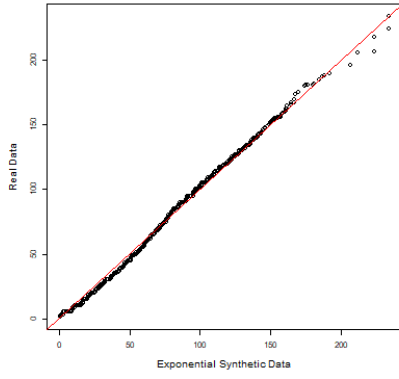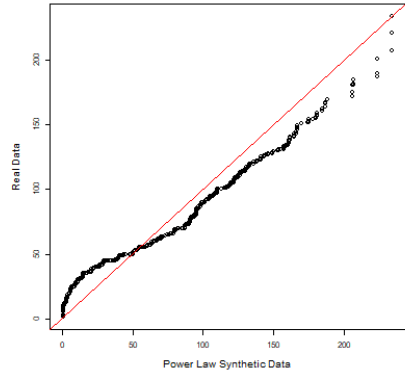

**College 50 Cohort 3**

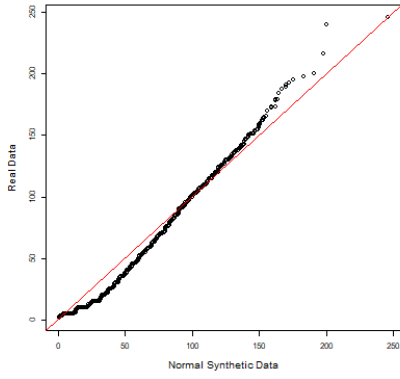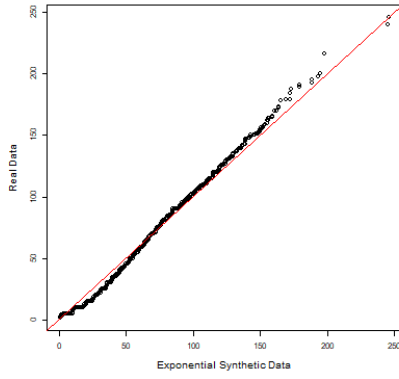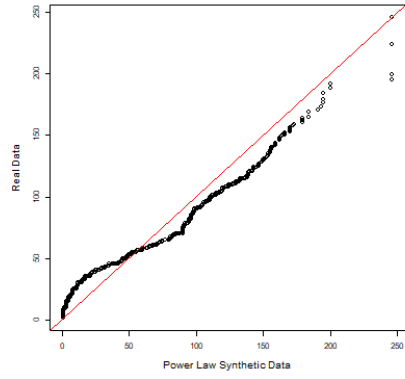



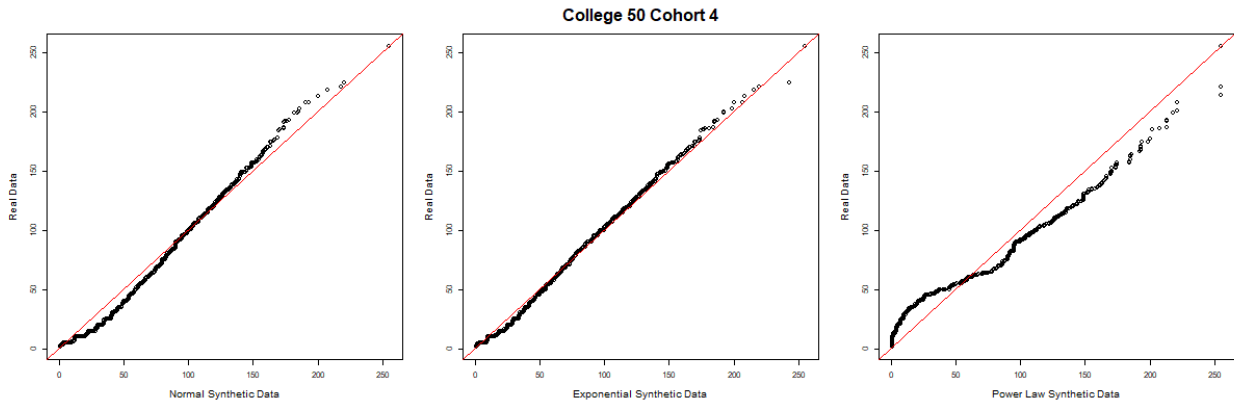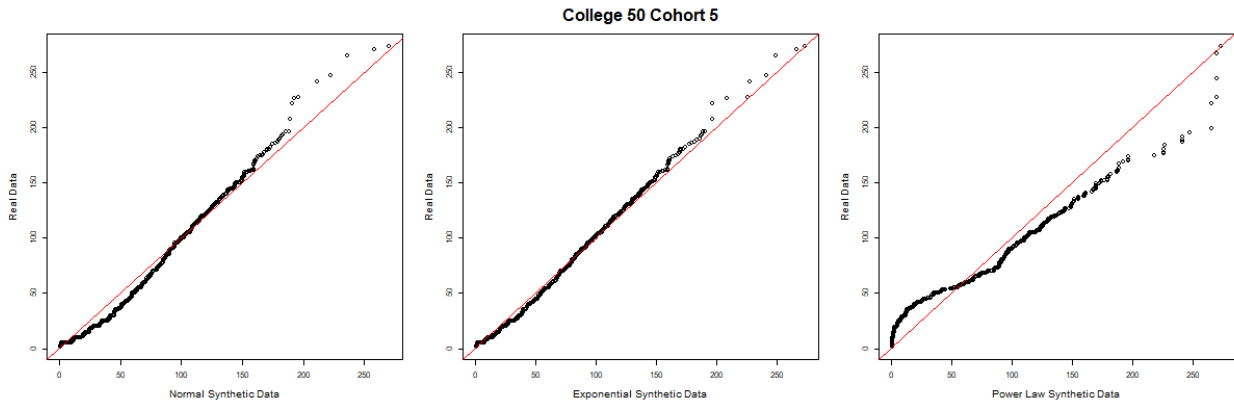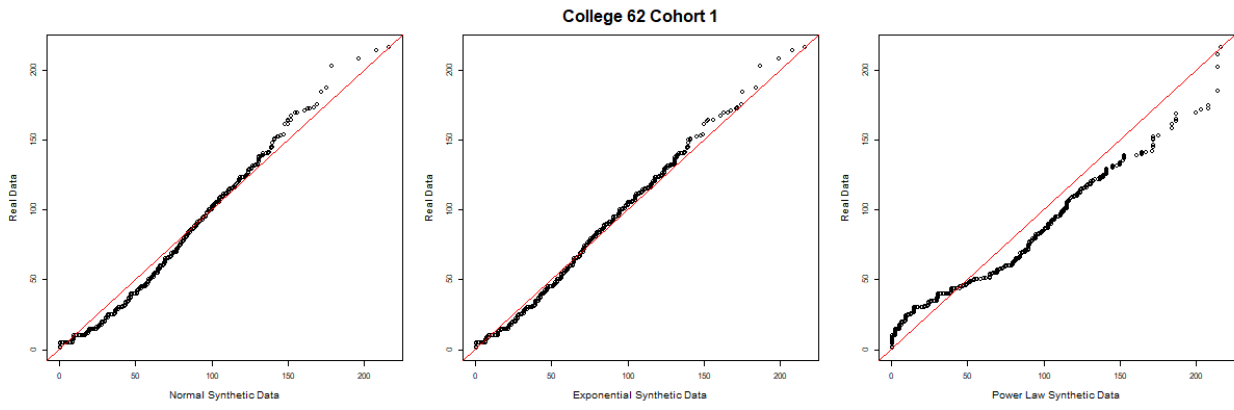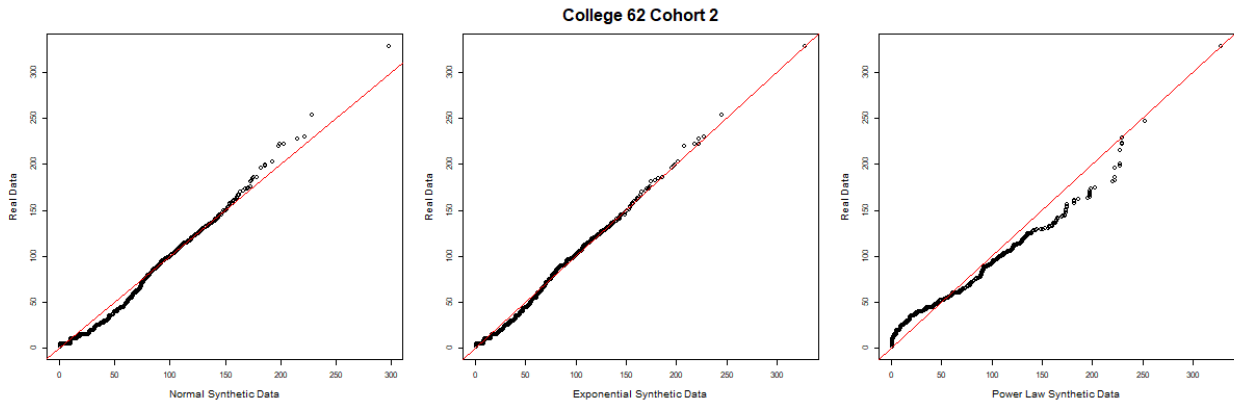

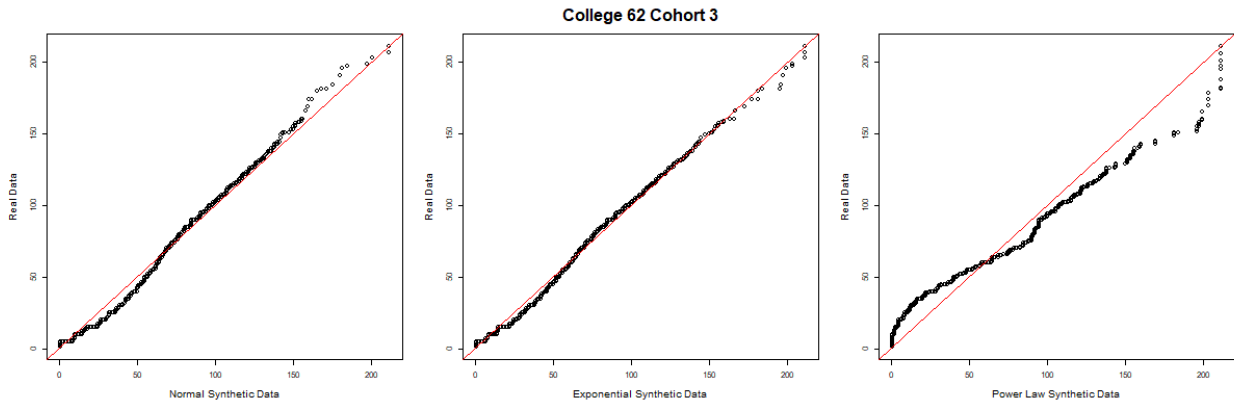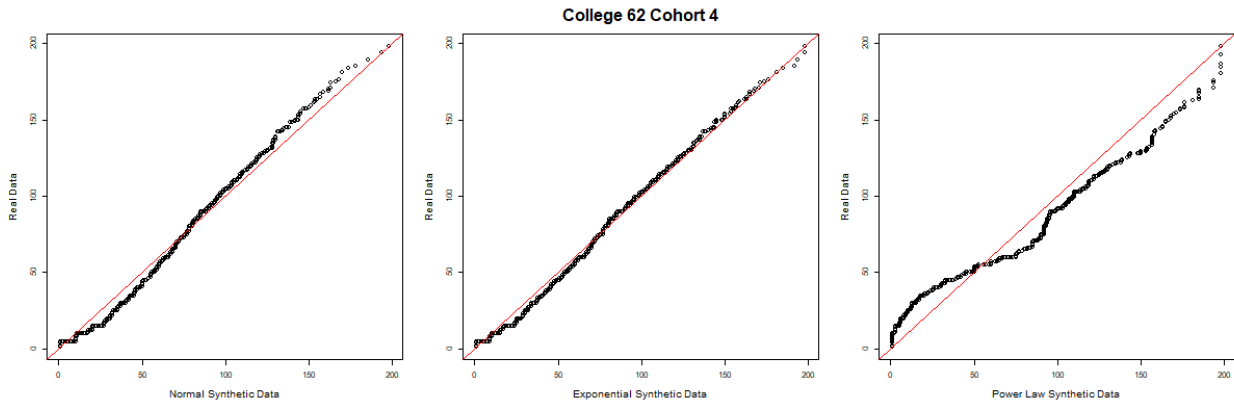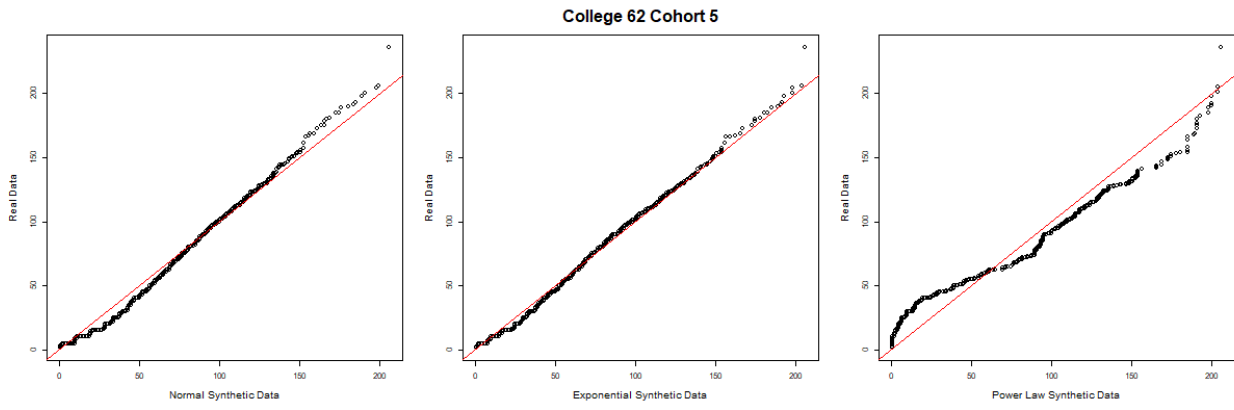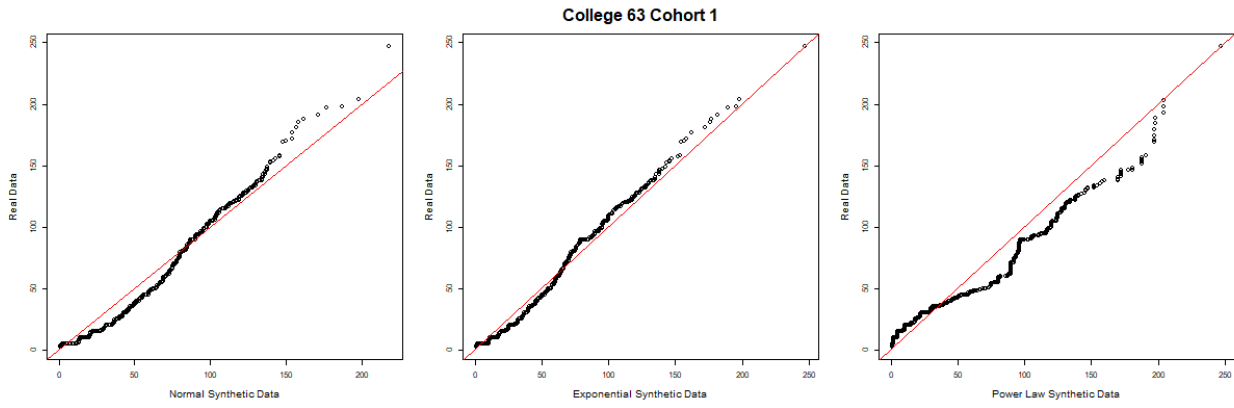

**College 63 Cohort 2**

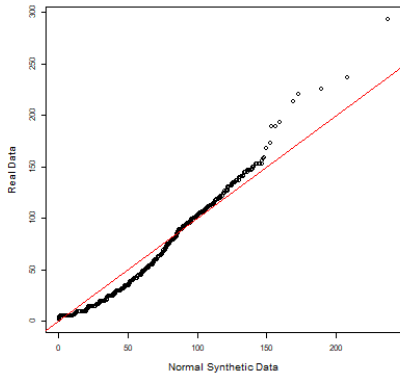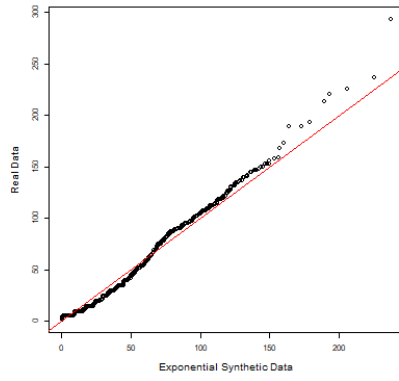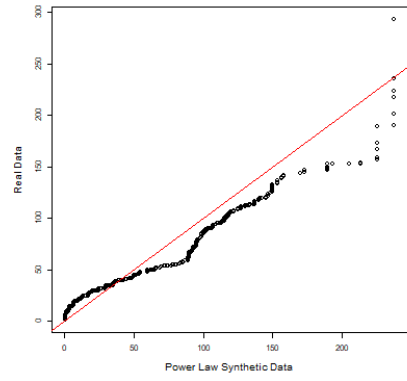

**College 63 Cohort 3**

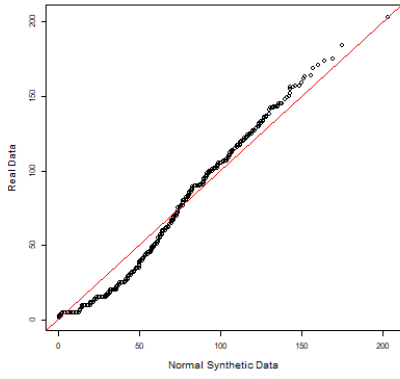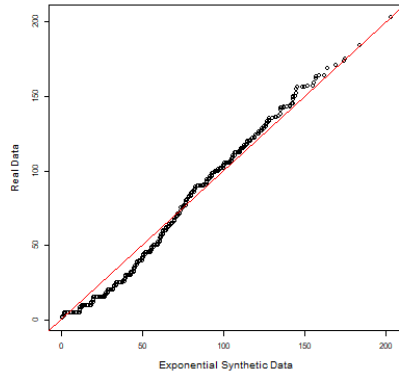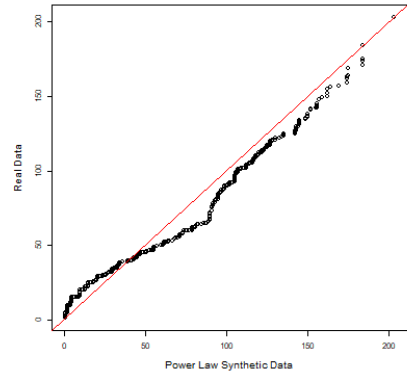

**College 63 Cohort 4**

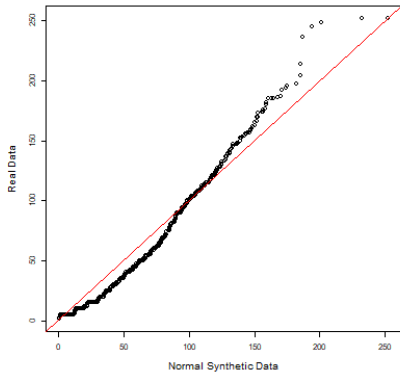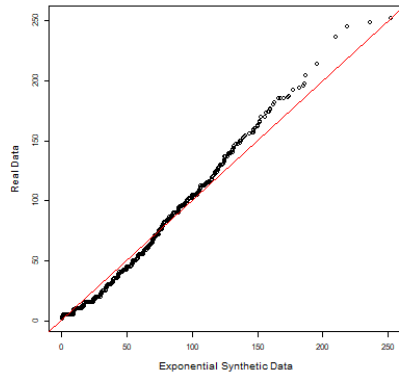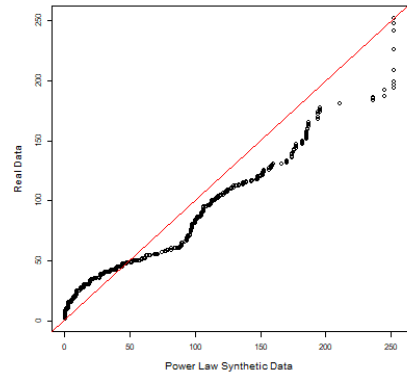

**College 63 Cohort 5**

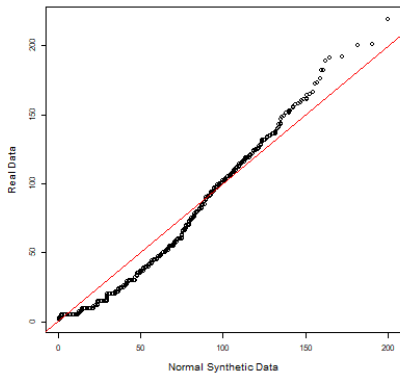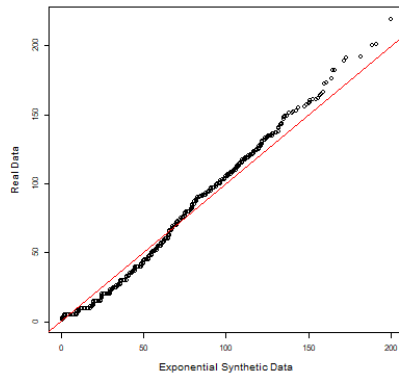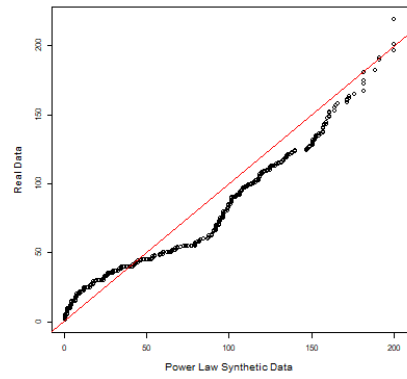

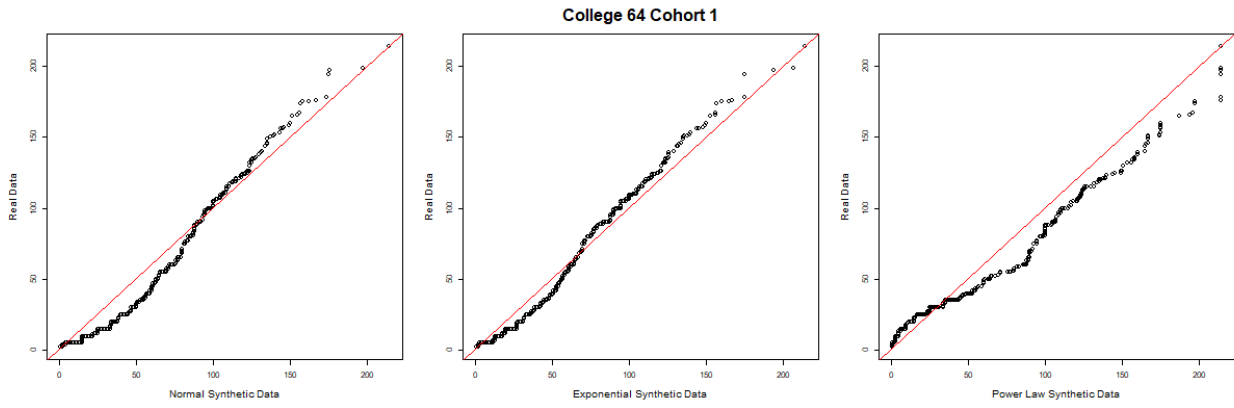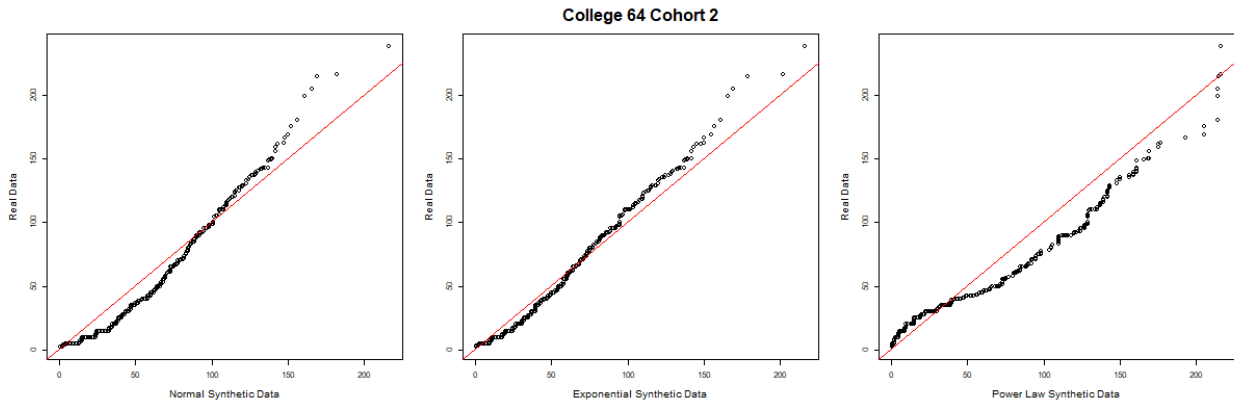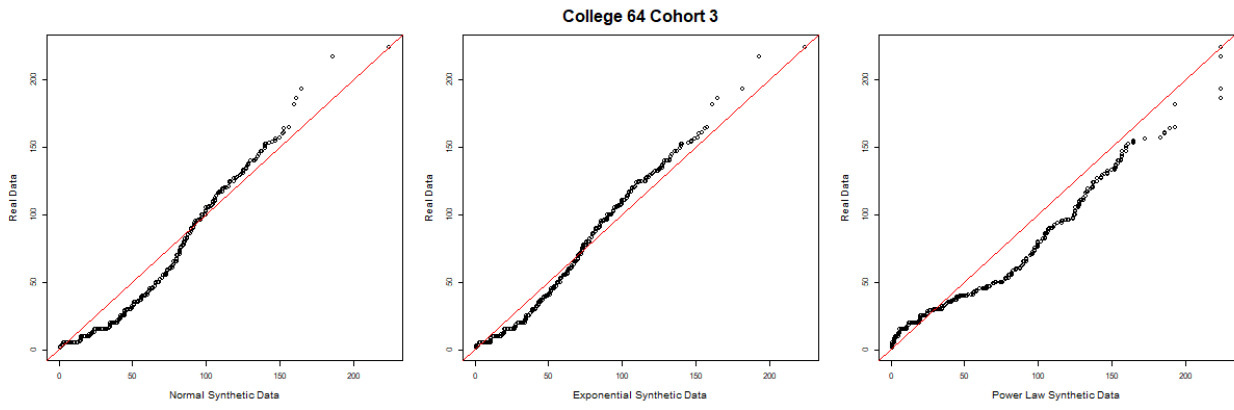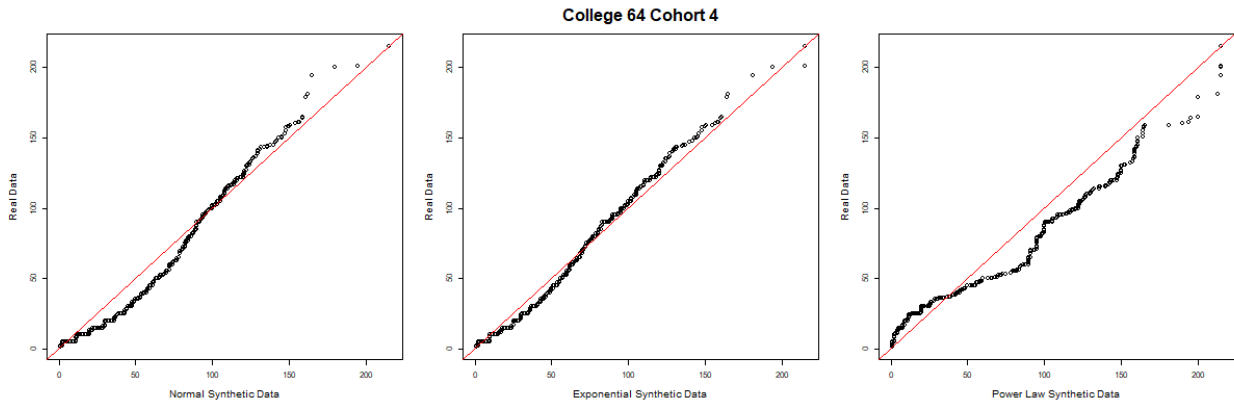

**College 64 Cohort 5**

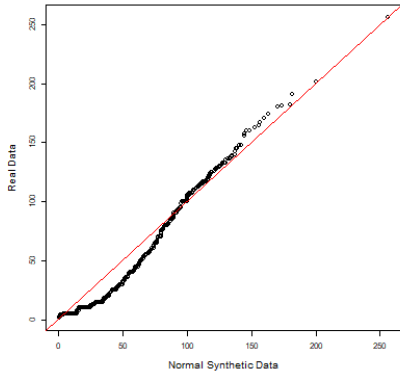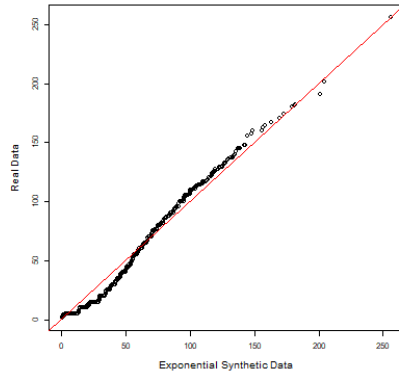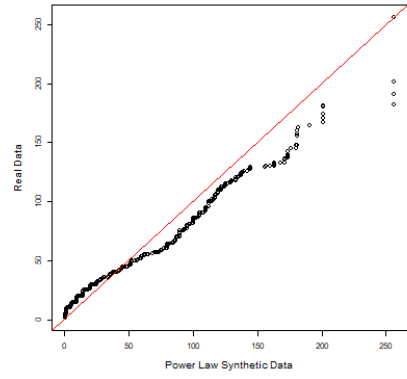

**College 70 Cohort 1**

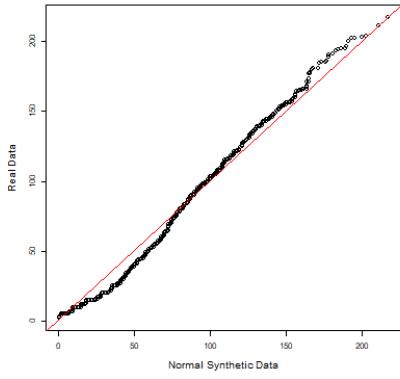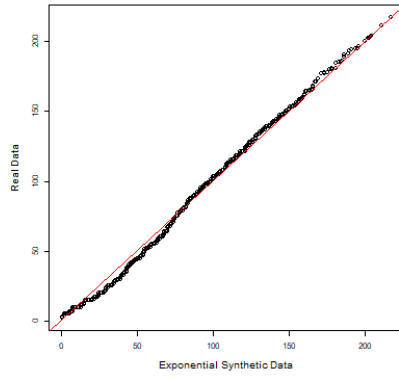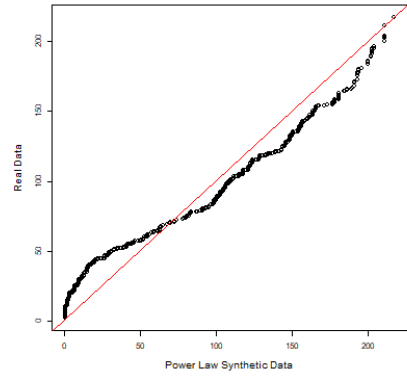

**College 70 Cohort 2**

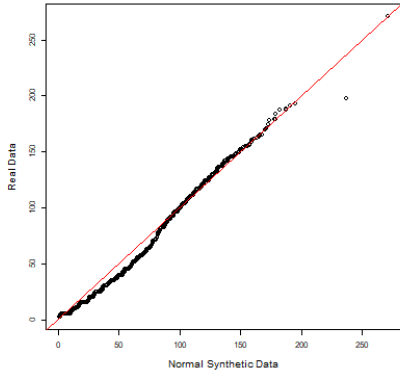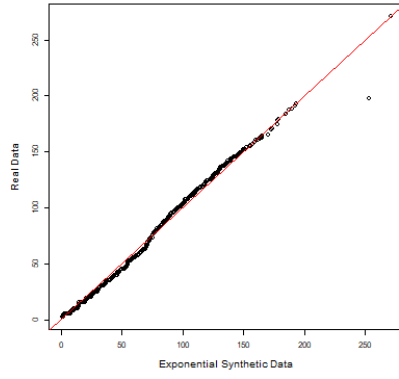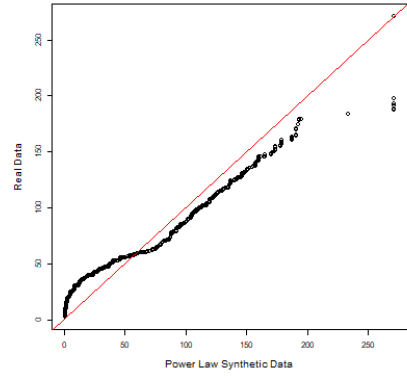

**College 70 Cohort 3**

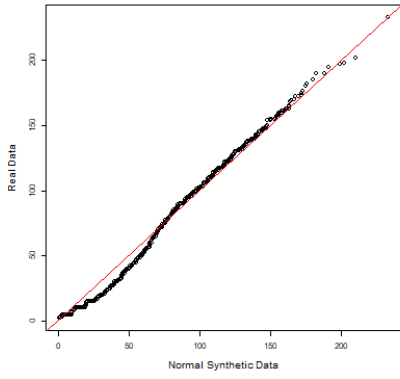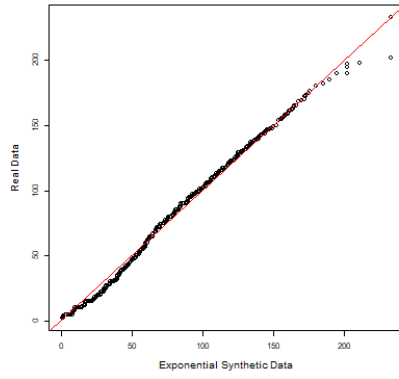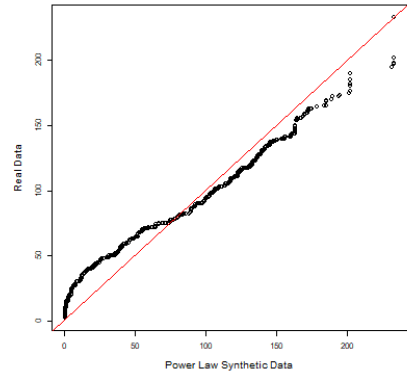

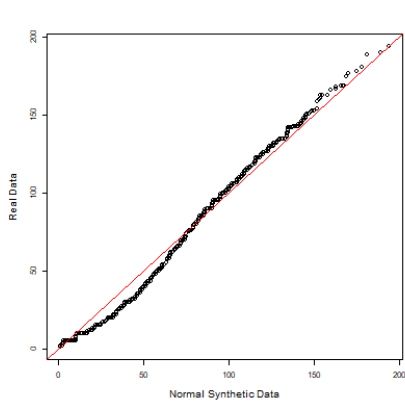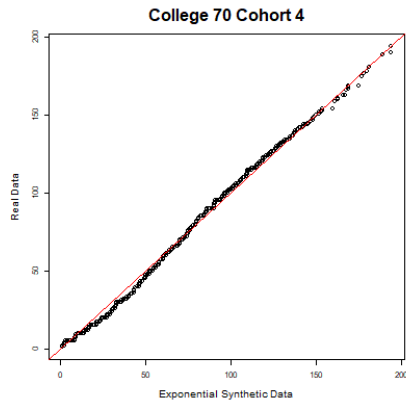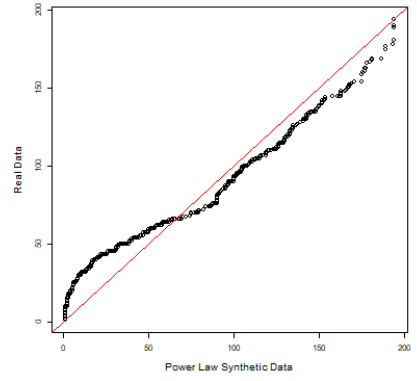

**College 70 Cohort 4**

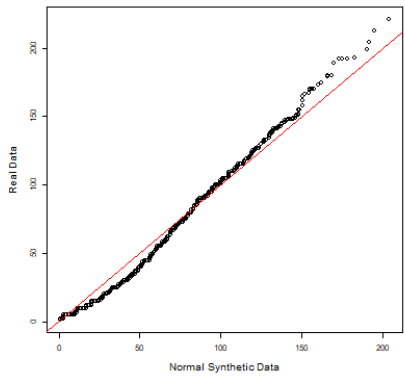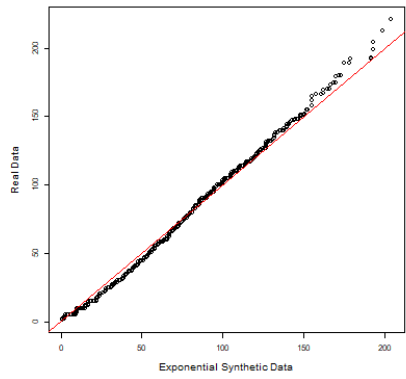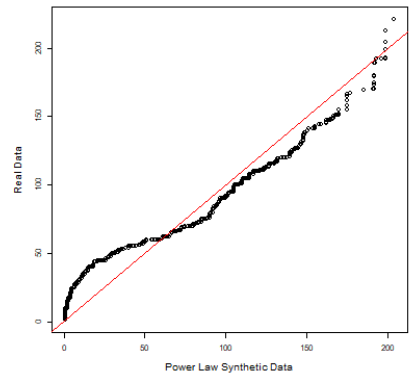

**College 70 Cohort 5**

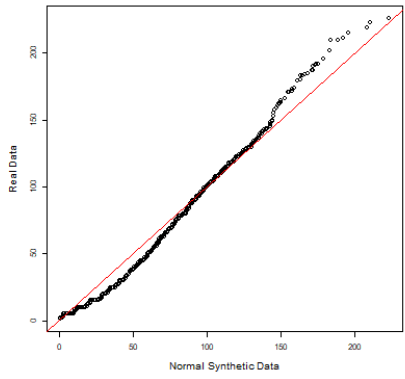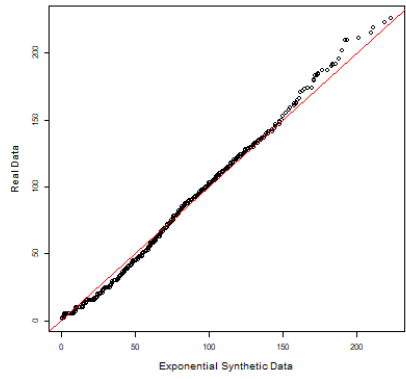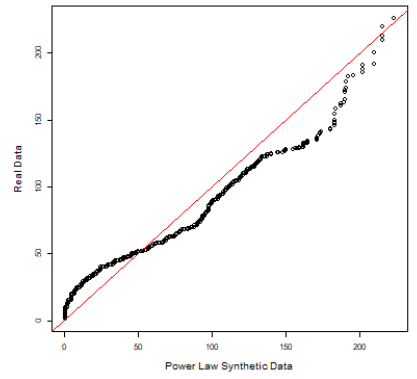

**College 90 Cohort 1**

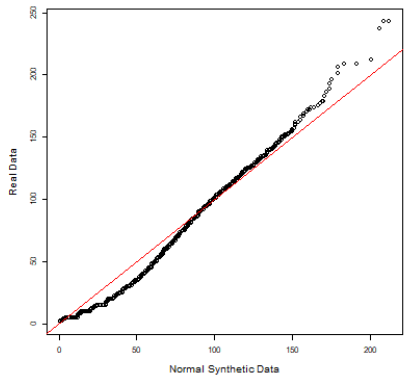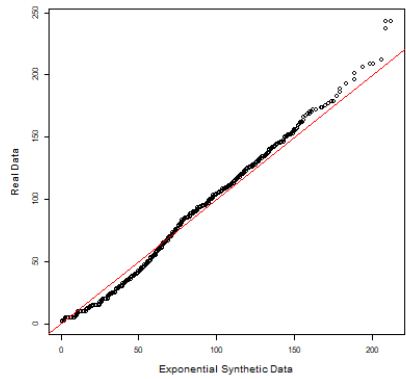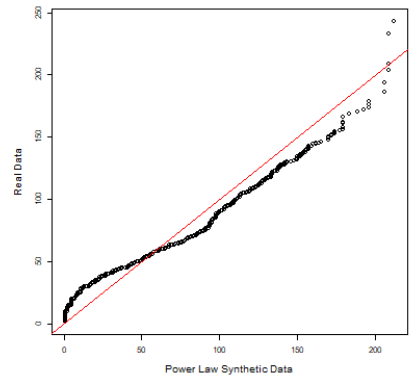

**College 90 Cohort 2**

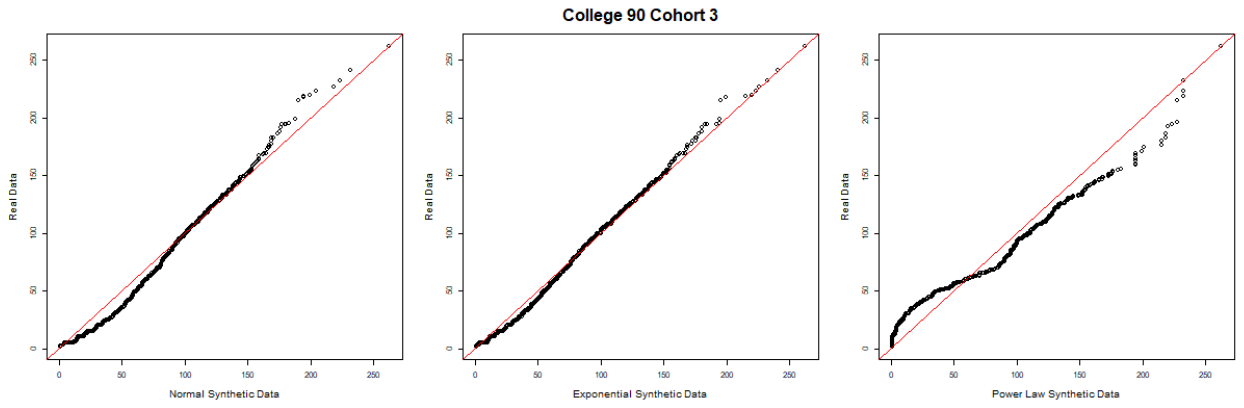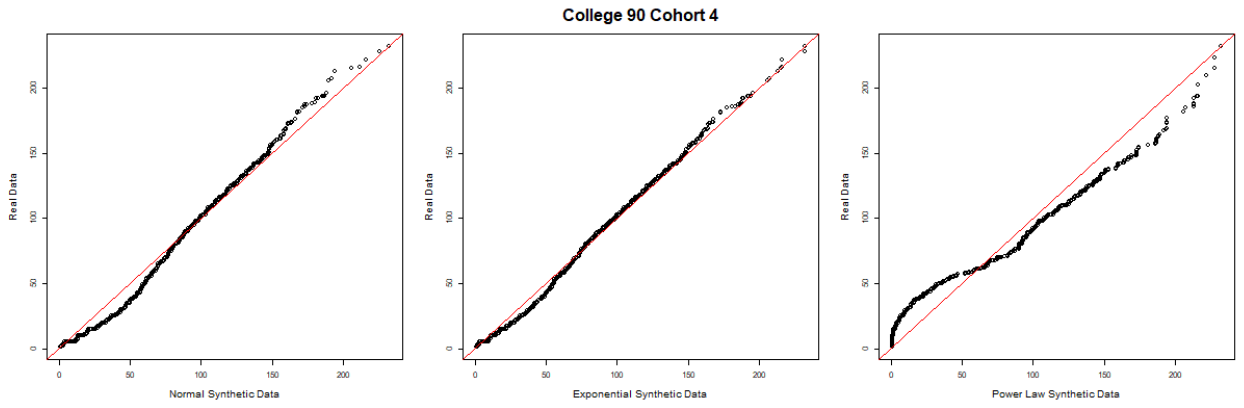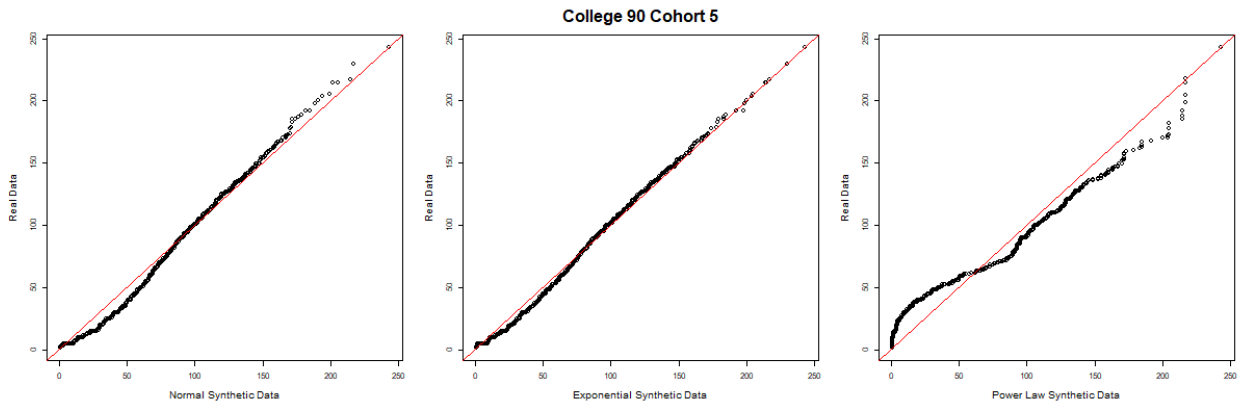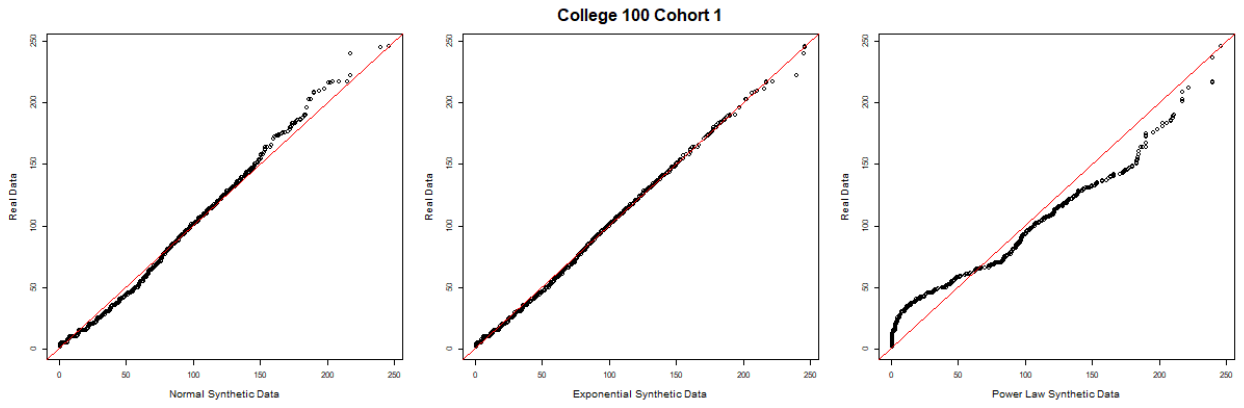

**College 100 Cohort 2**

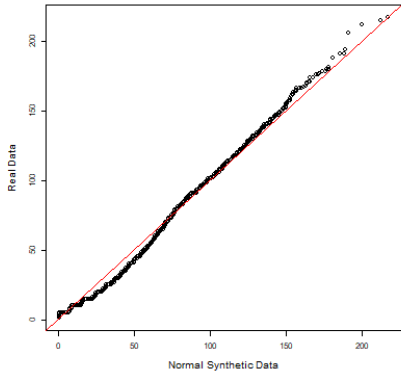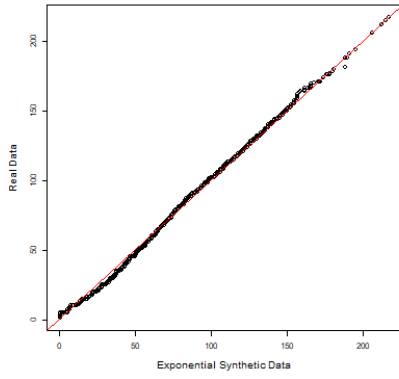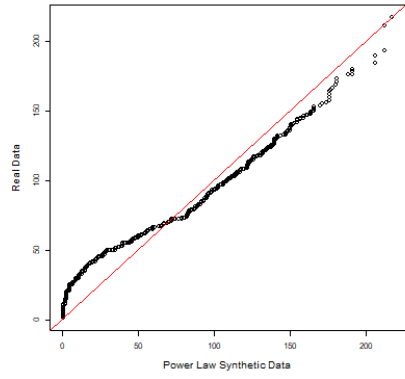

**College 100 Cohort 3**

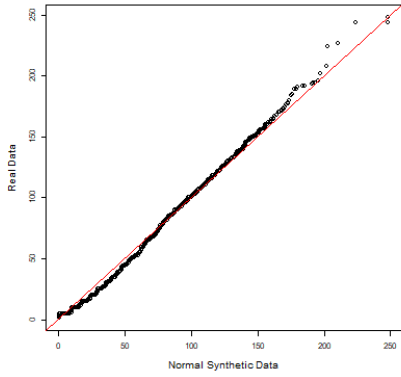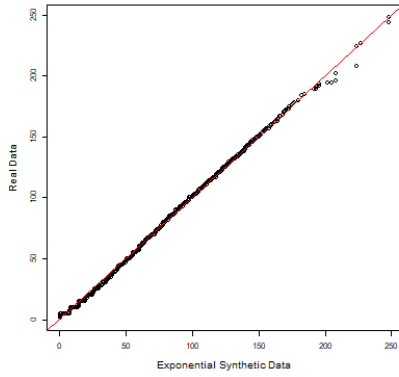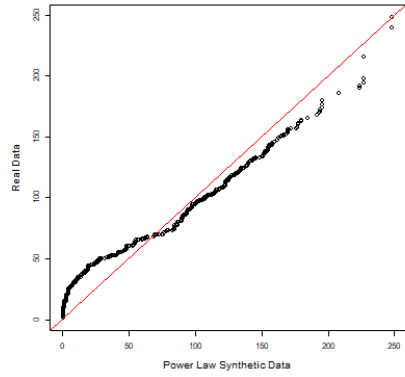

**College 100 Cohort 4**

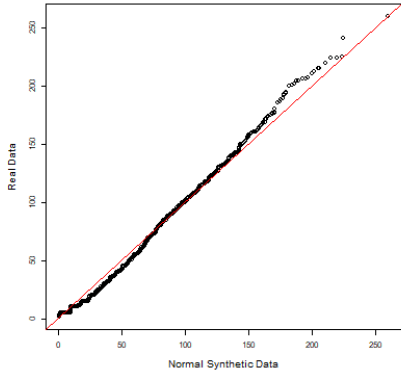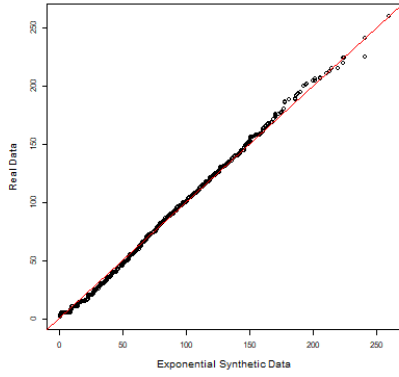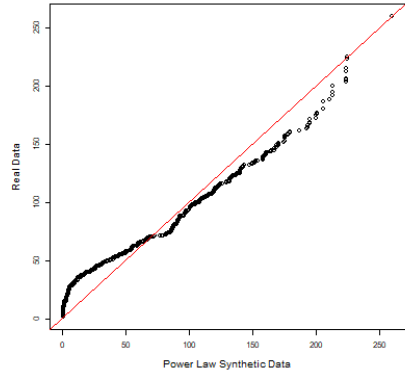

**College 100 Cohort 5**

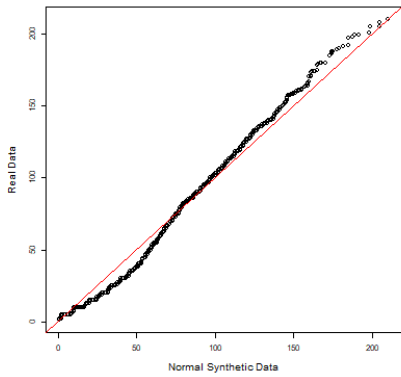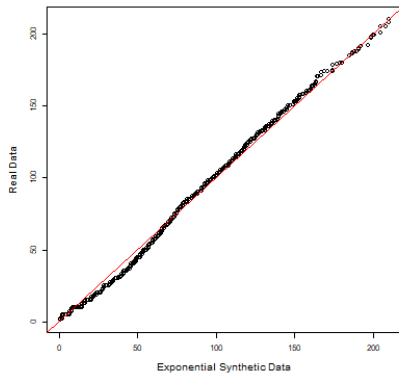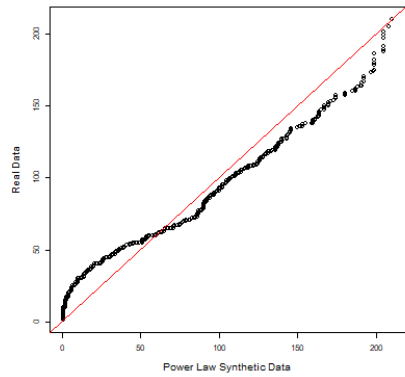



College 111 Cohort 1

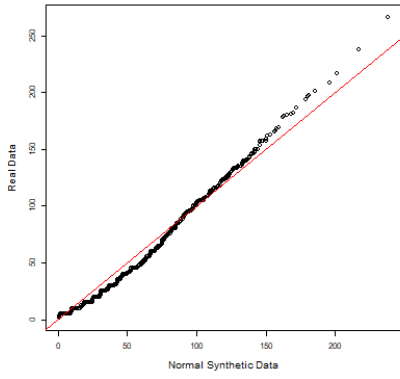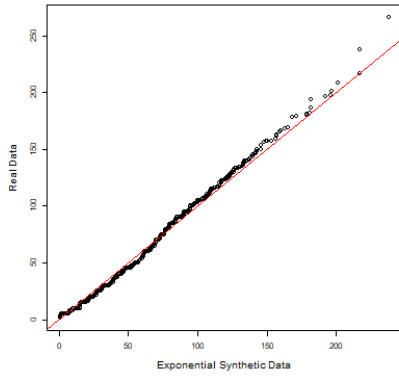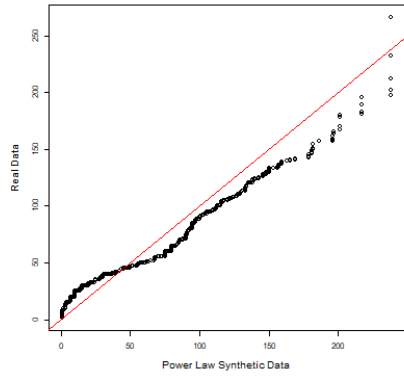

College 111 Cohort 2

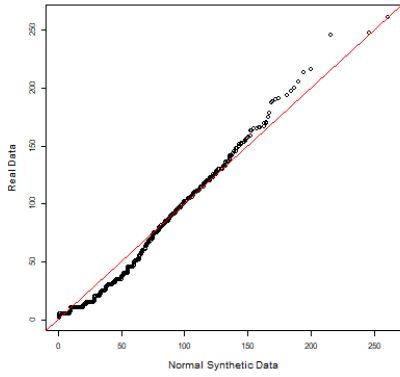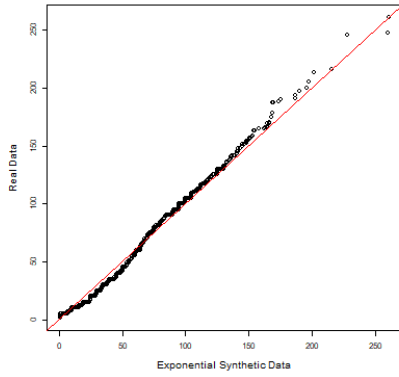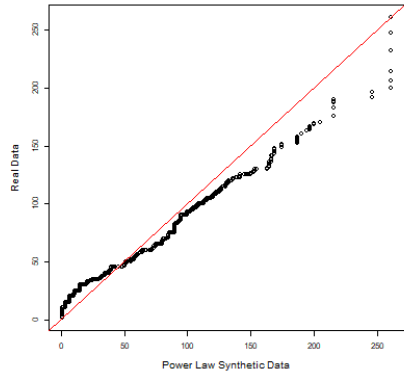

College 111 Cohort 3

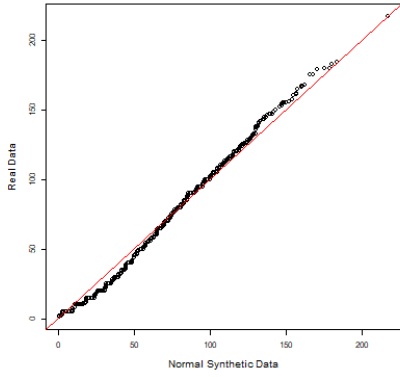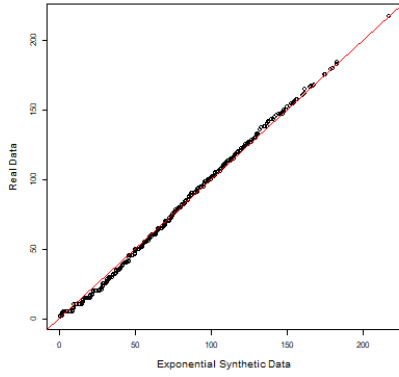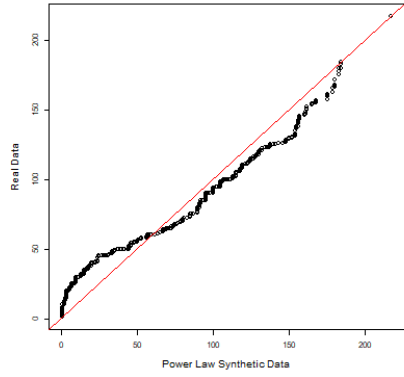

College 111 Cohort 4

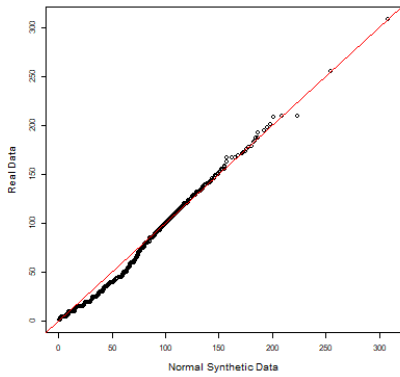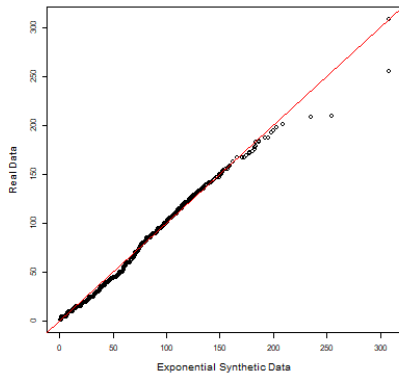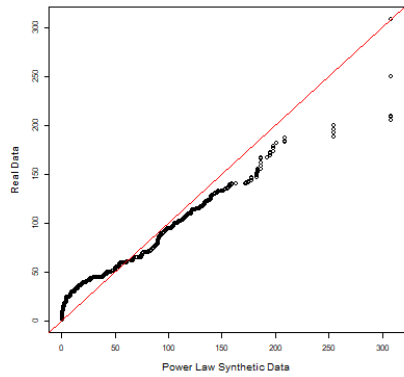



**College 112 Cohort 4**

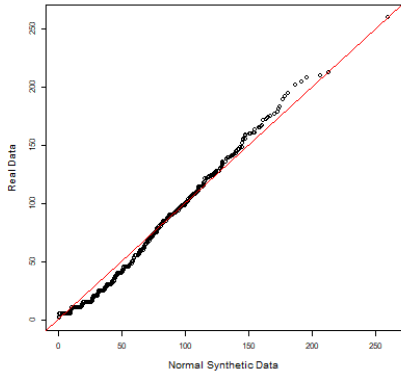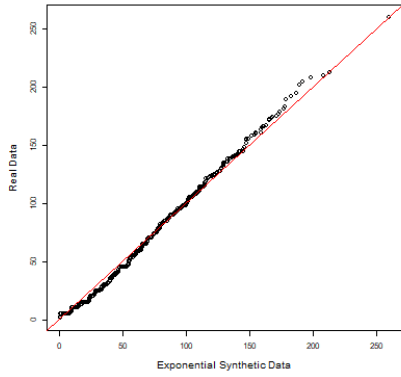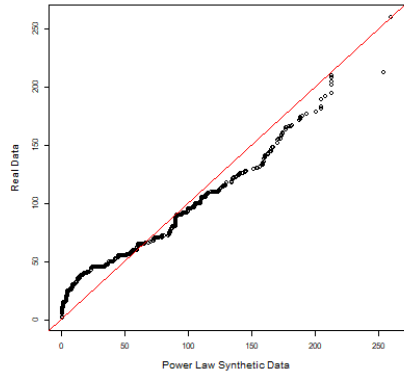

**College 112 Cohort 5**

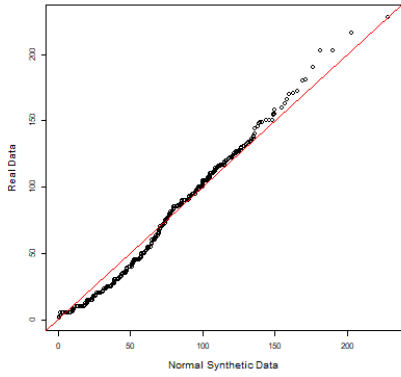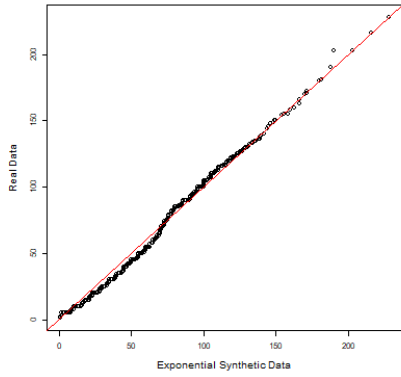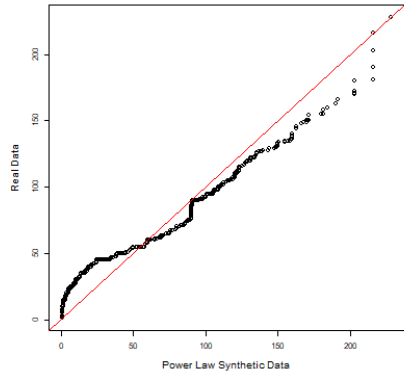

**College 121 Cohort 1**

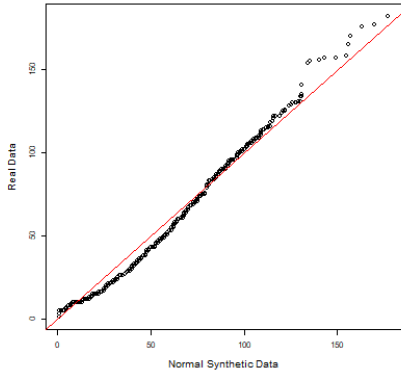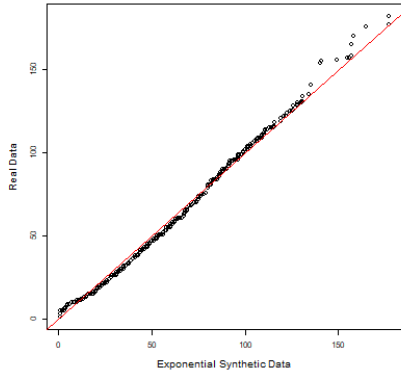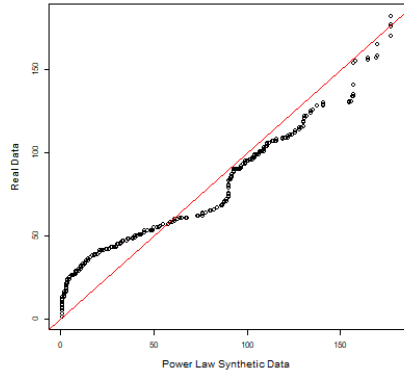

**College 121 Cohort 2**

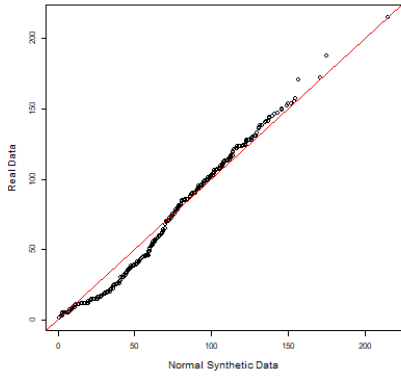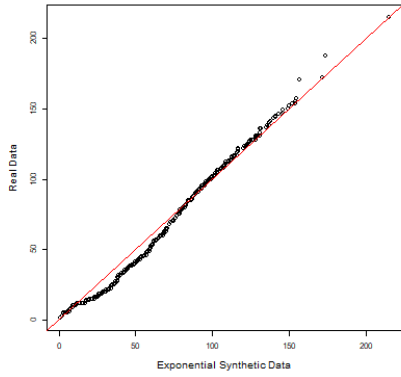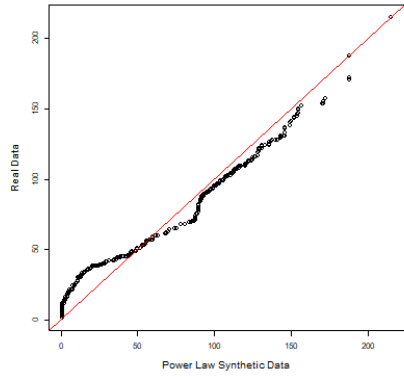

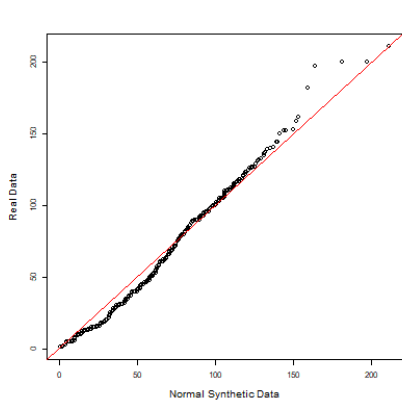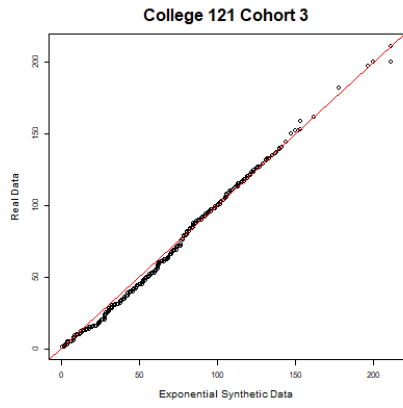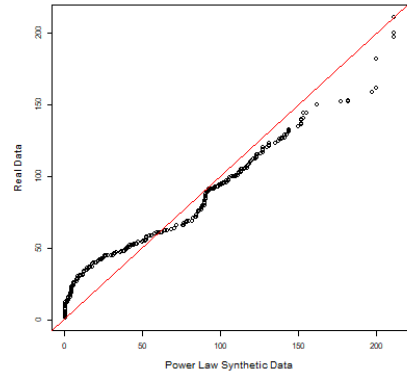

College 121 Cohort 3

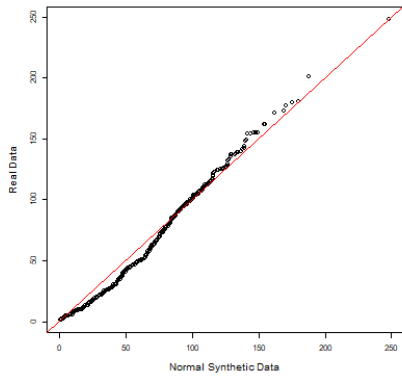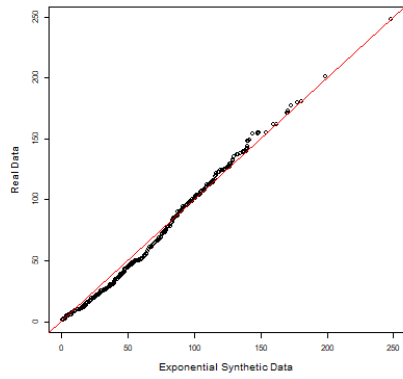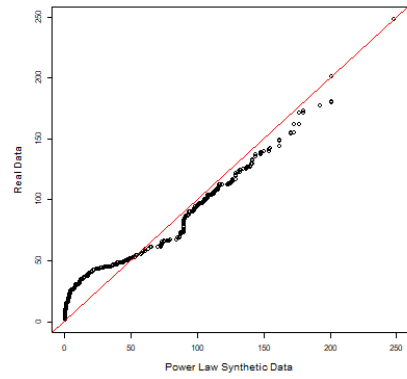

College 121 Cohort 4

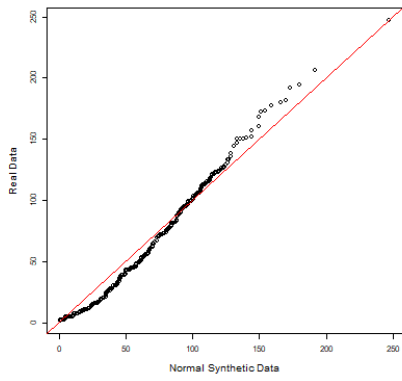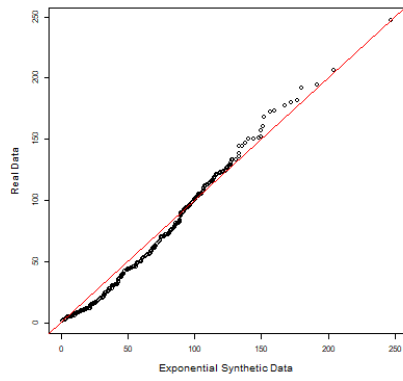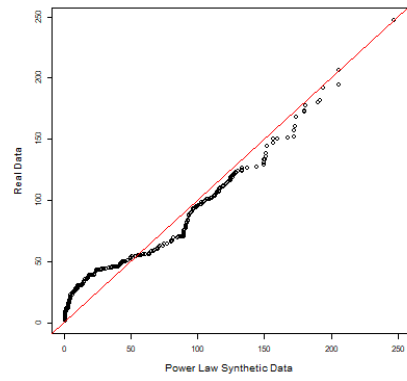

College 121 Cohort 5

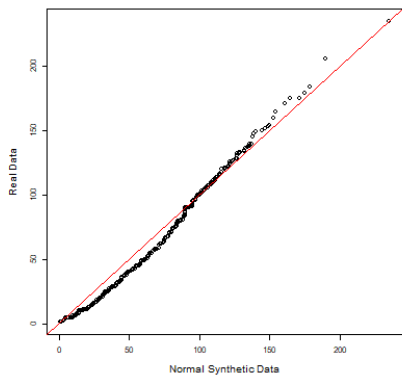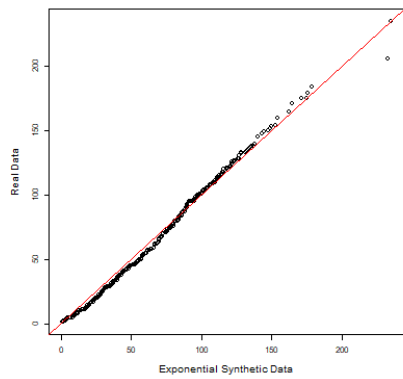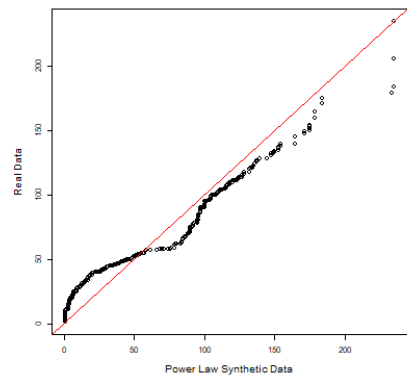

College 130 Cohort 1

**College 130 Cohort 2**

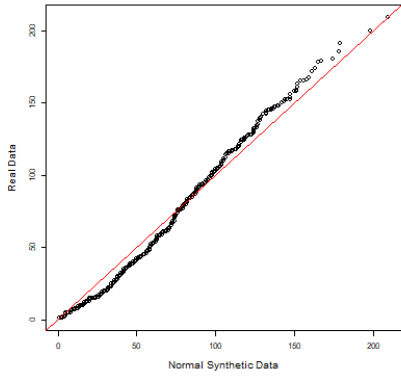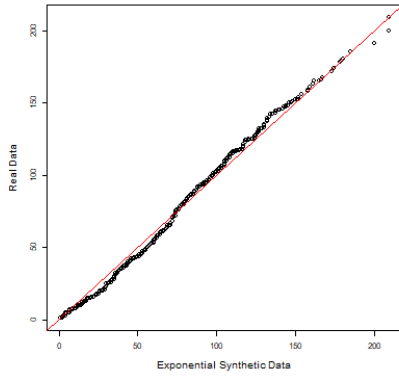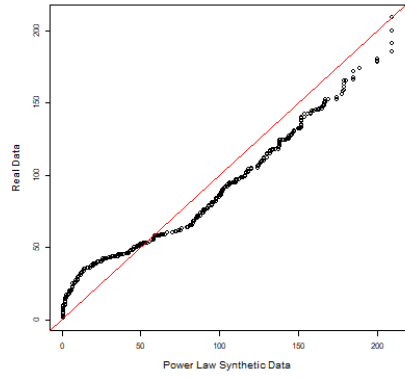

**College 130 Cohort 3**

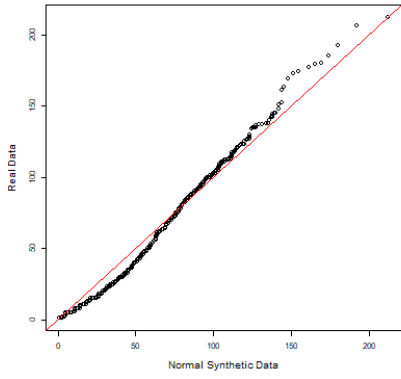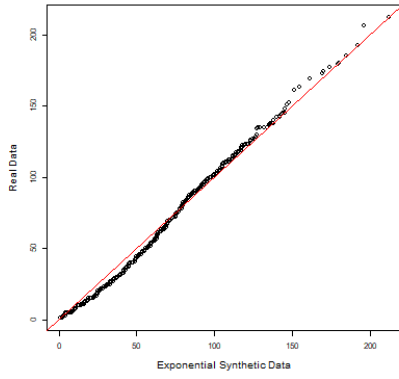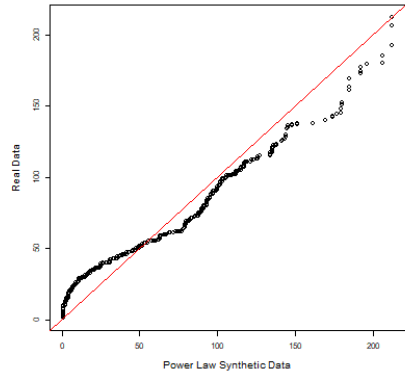

**College 130 Cohort 4**

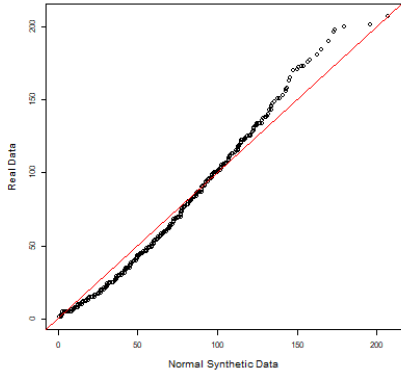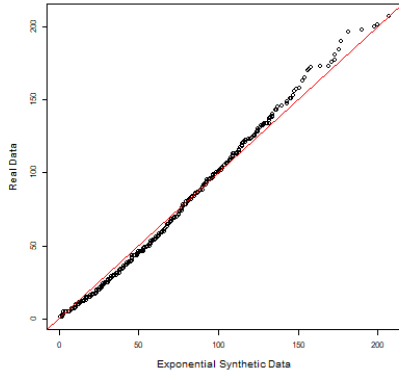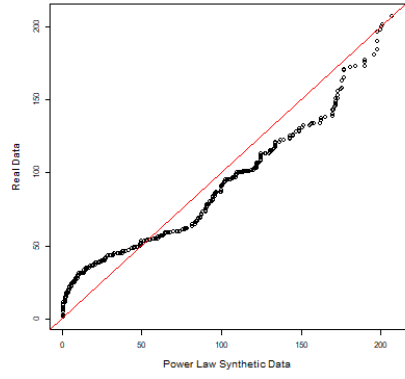

**College 130 Cohort 5**

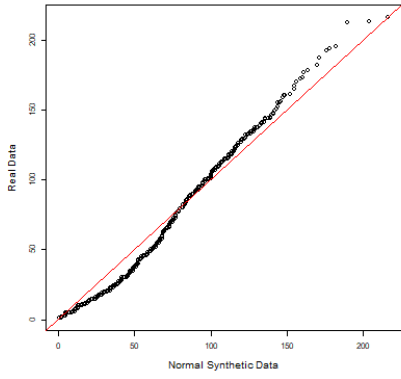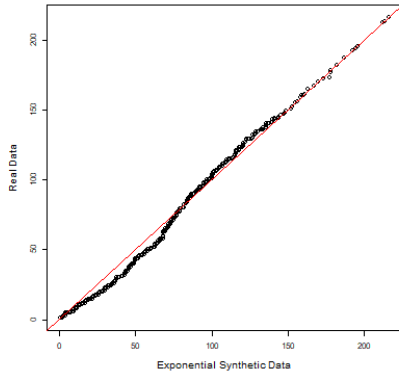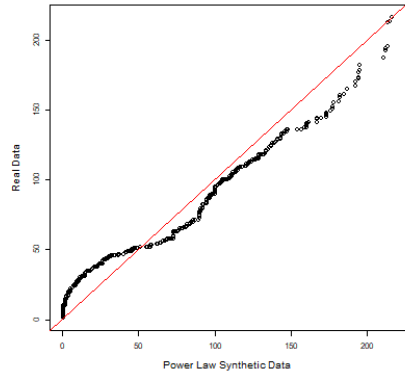

College 140 Cohort 1

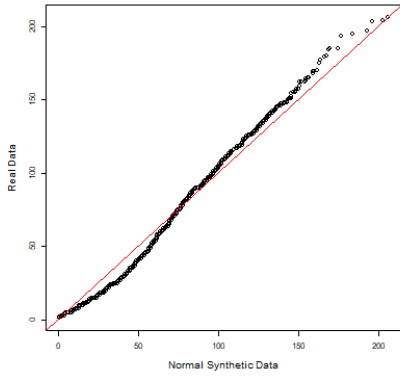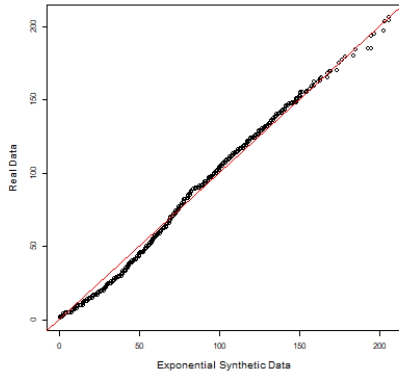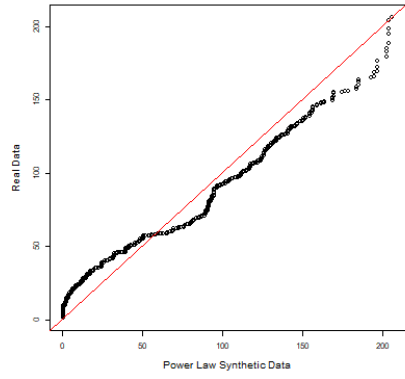

College 140 Cohort 2

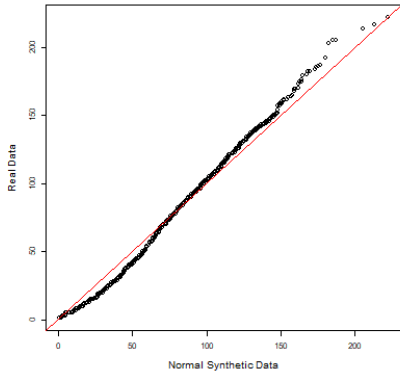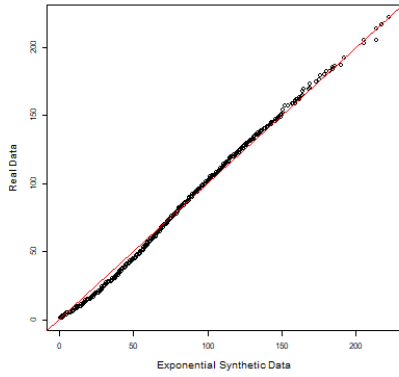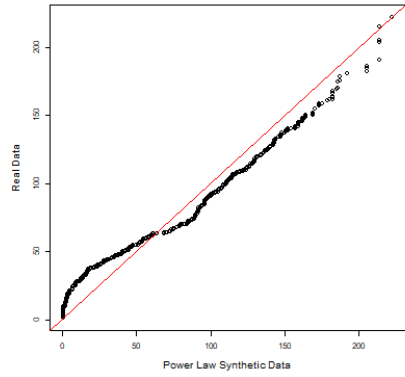

College 140 Cohort 3

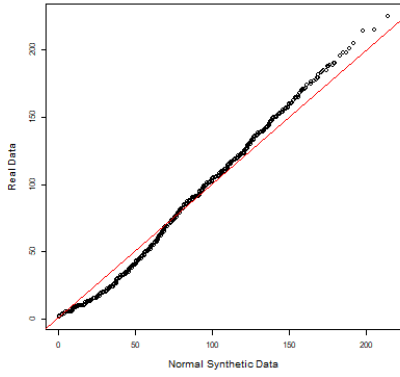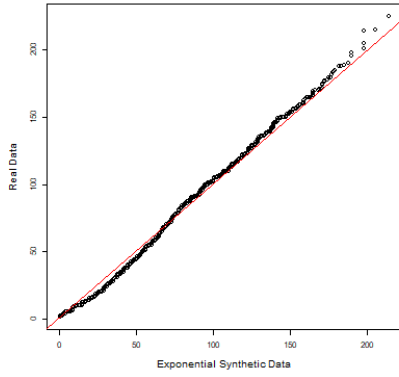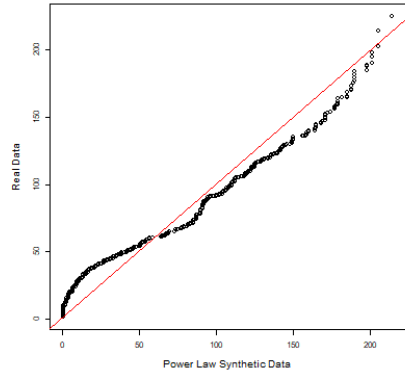

College 140 Cohort 4

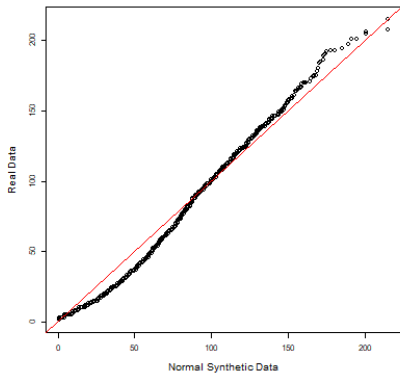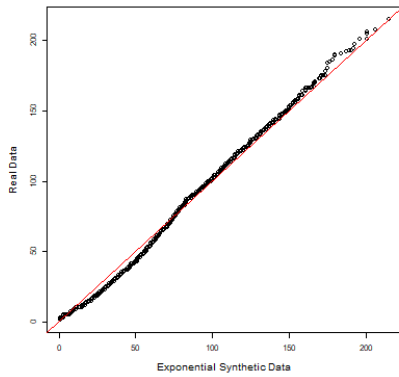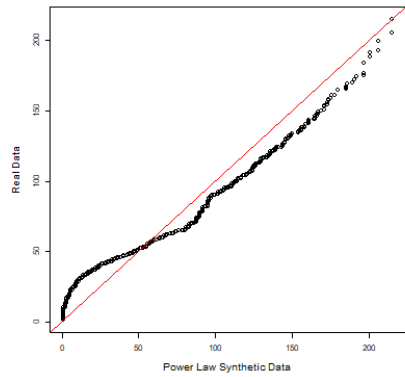

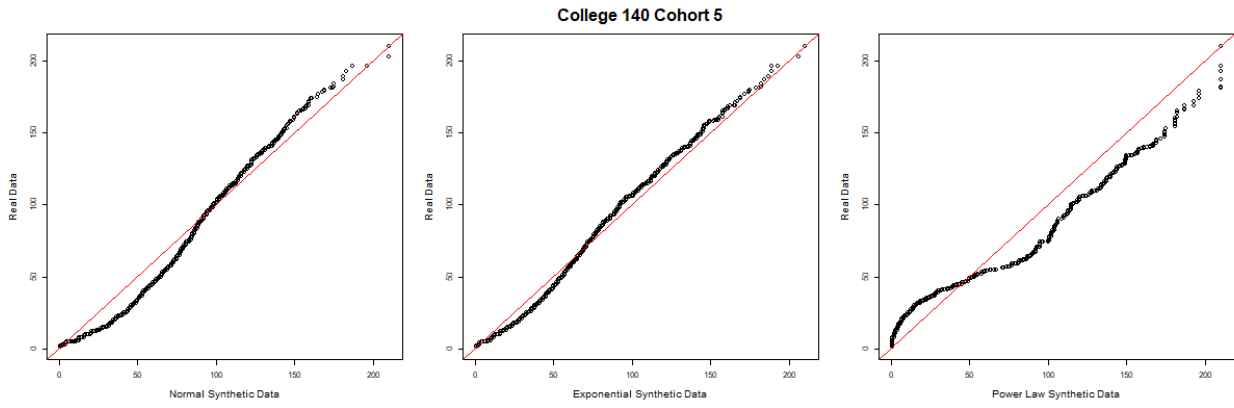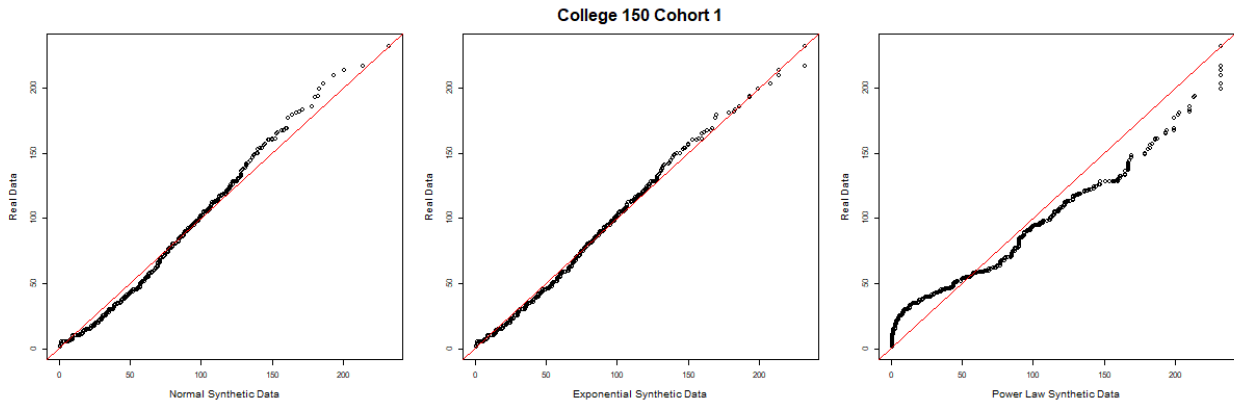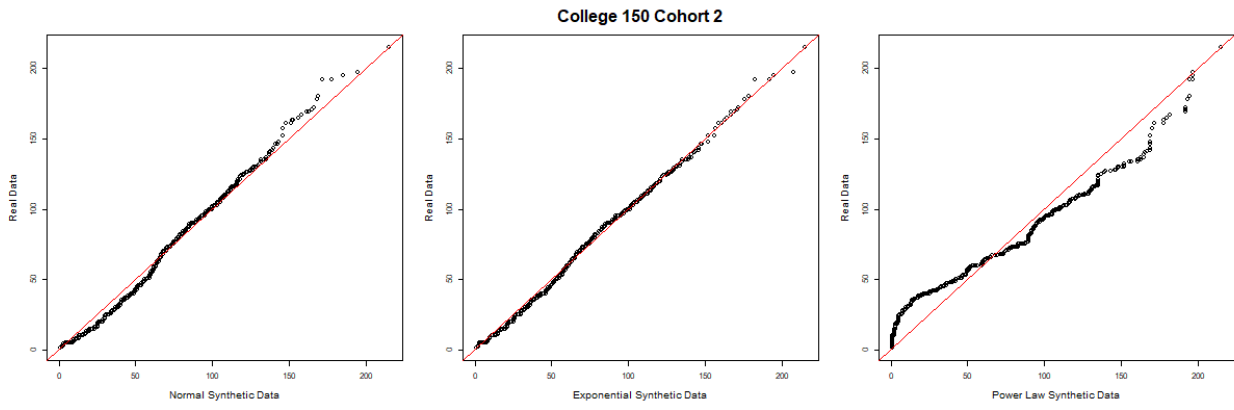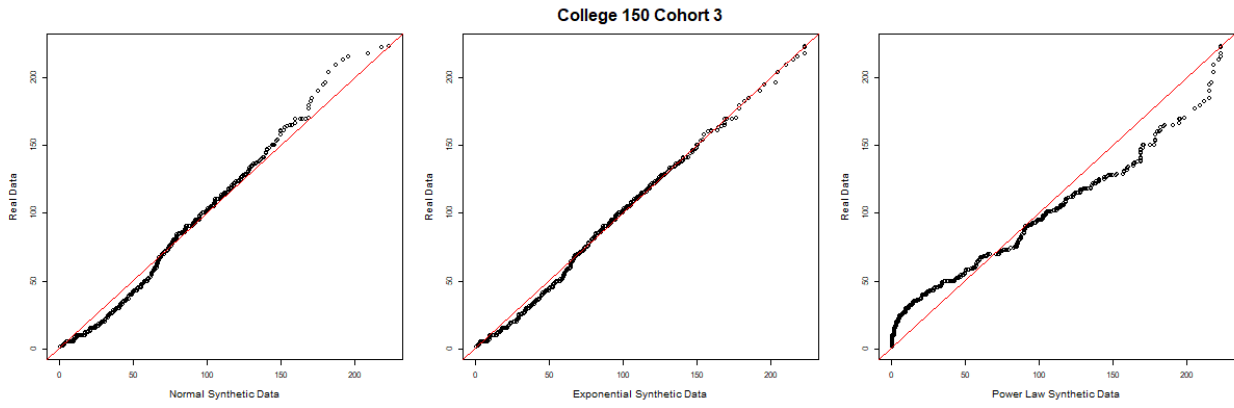

**College 150 Cohort 4**

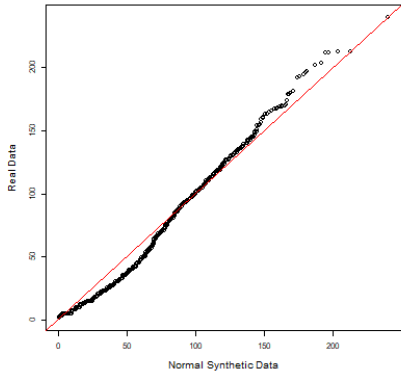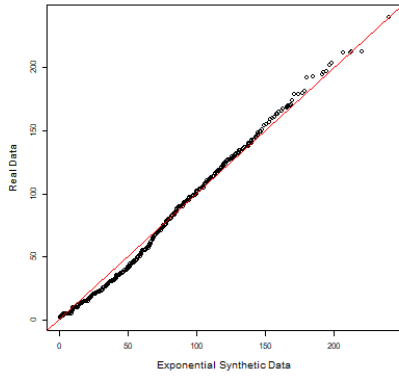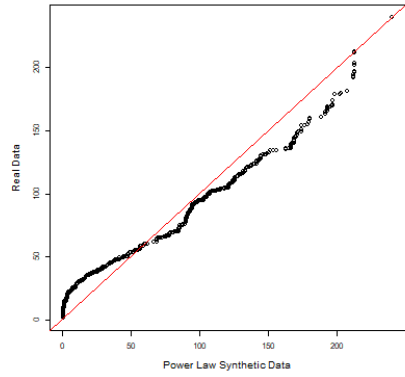

**College 150 Cohort 5**

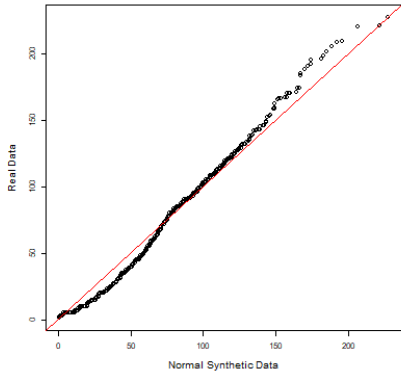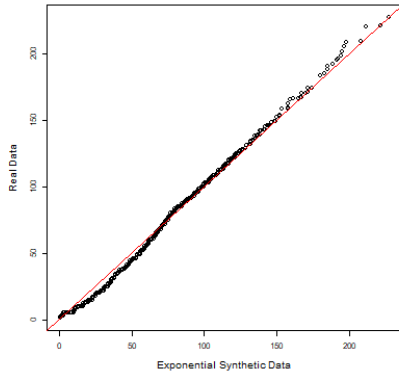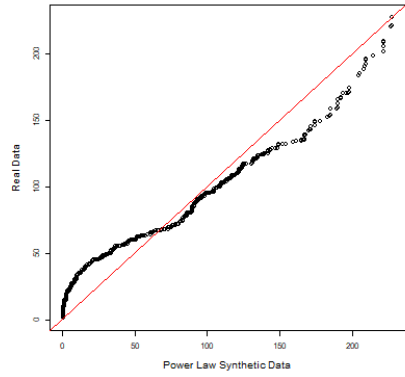

**College 160 Cohort 1**

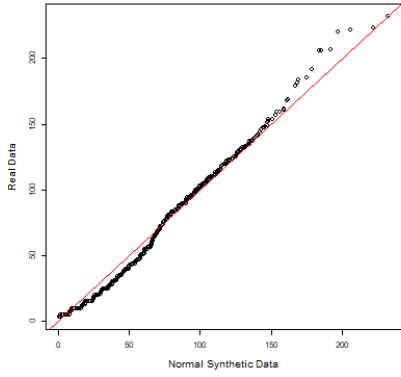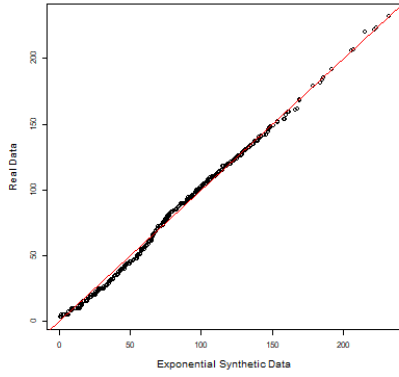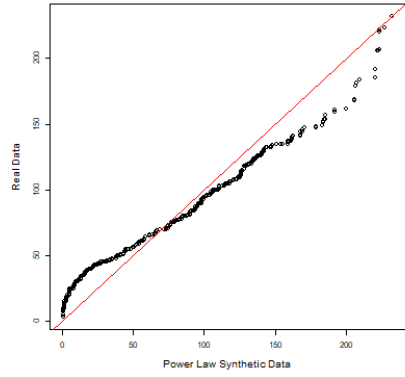

**College 160 Cohort 2**

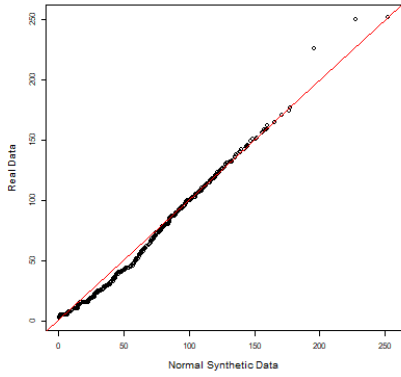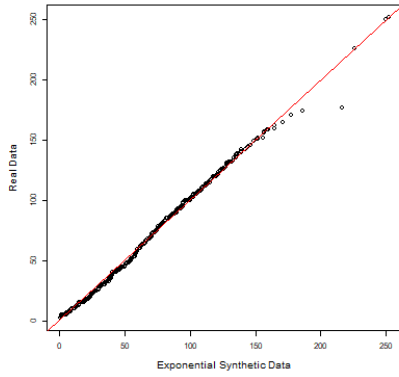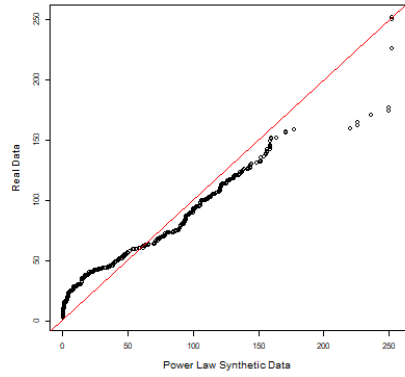





**College 171 Cohort 2**

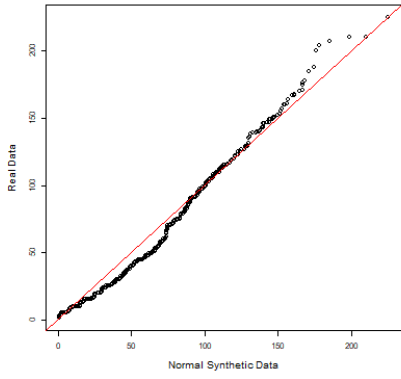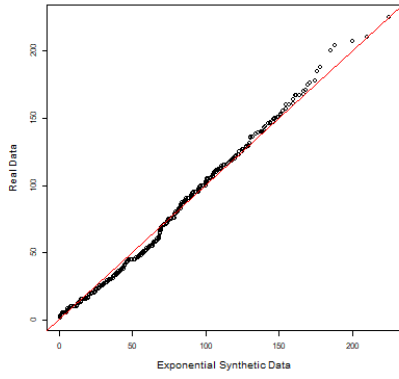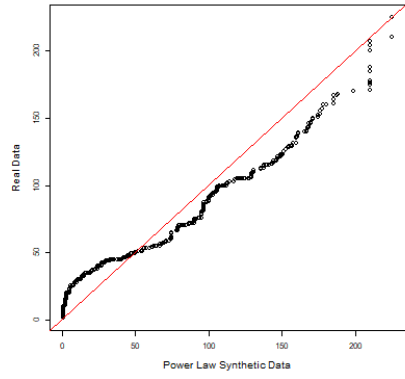

**College 171 Cohort 3**

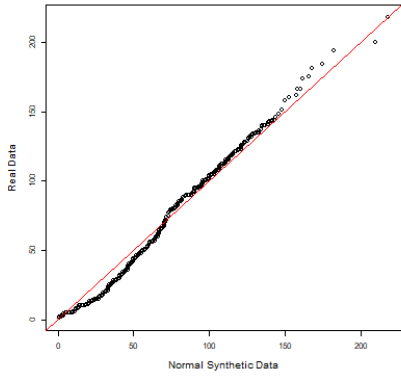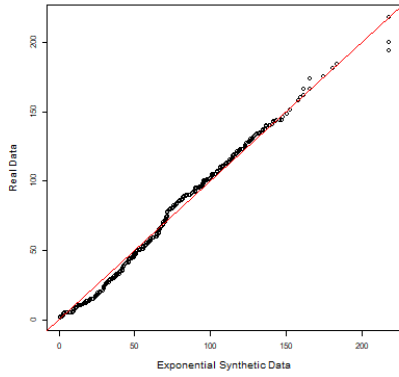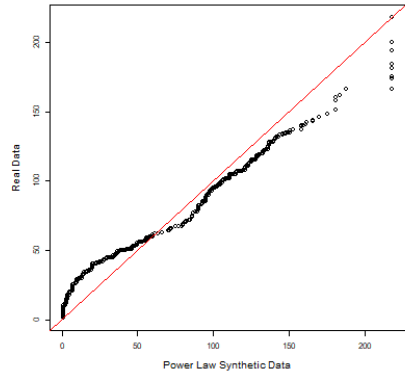

**College 171 Cohort 4**

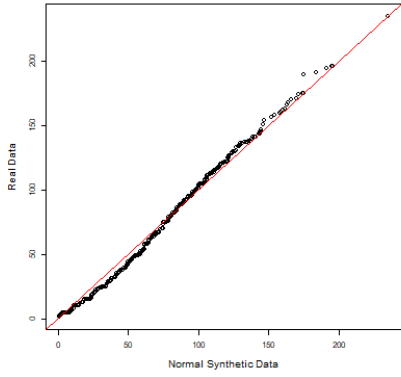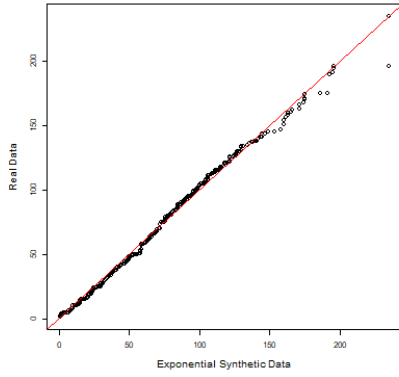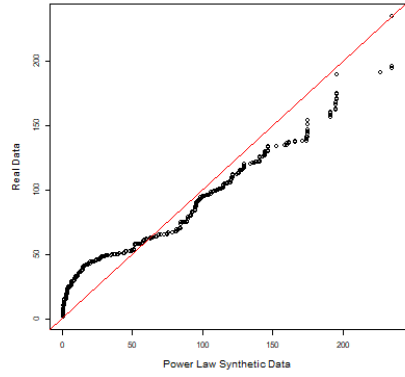

**College 171 Cohort 5**

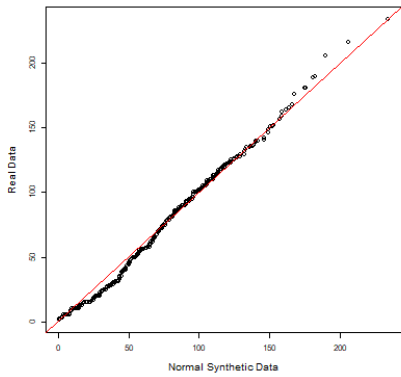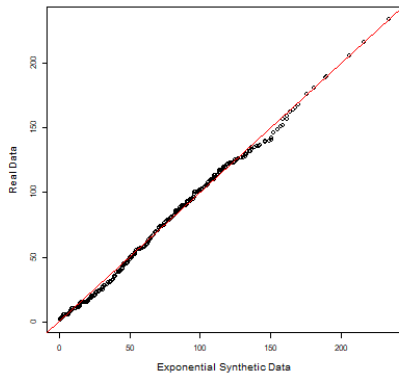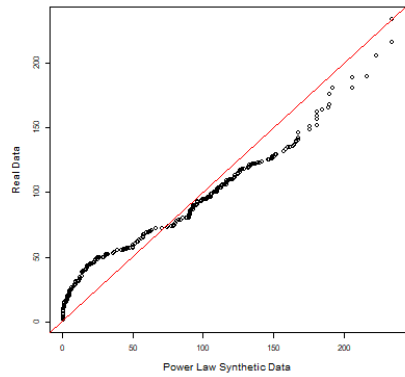

**College 172 Cohort 1**

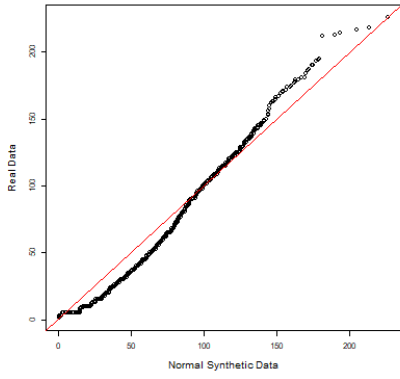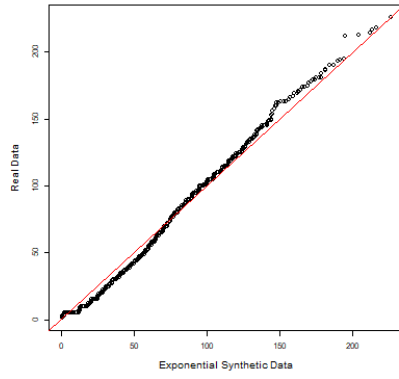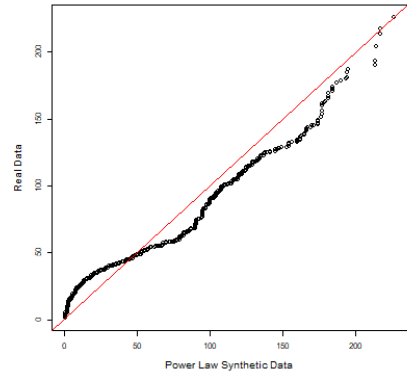

**College 172 Cohort 2**

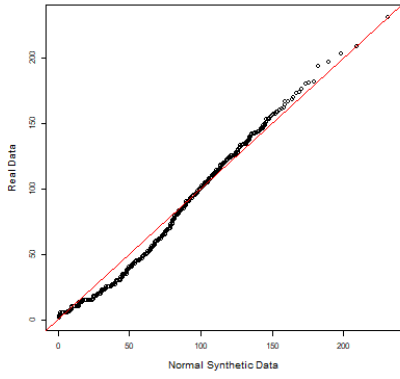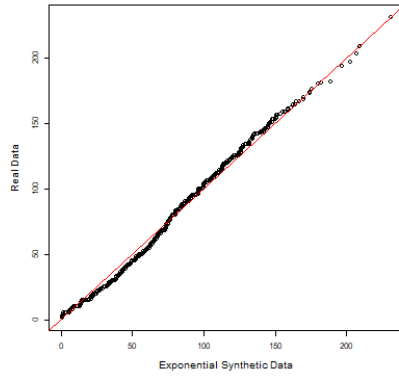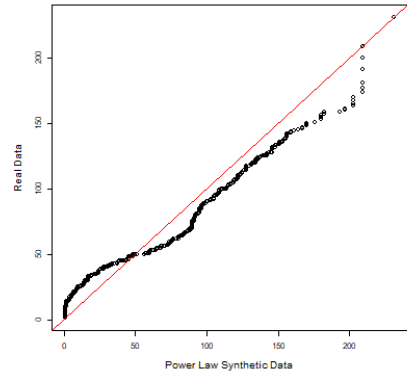

**College 172 Cohort 3**

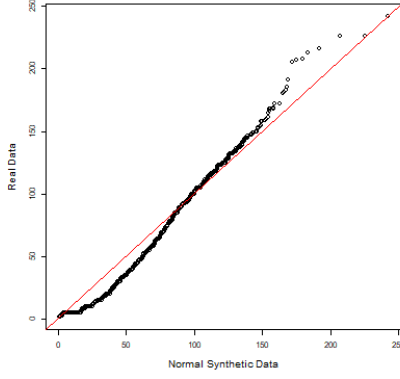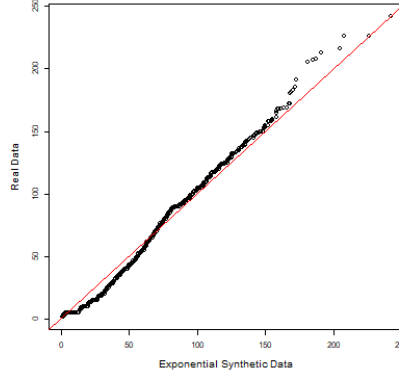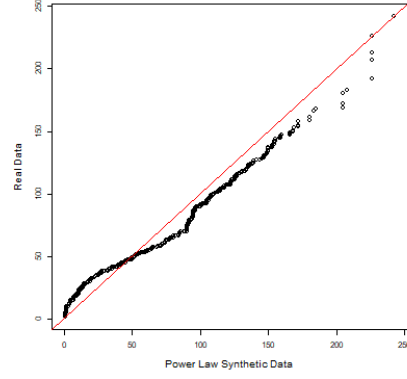

**College 172 Cohort 4**

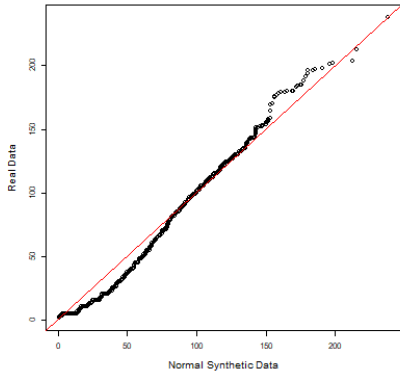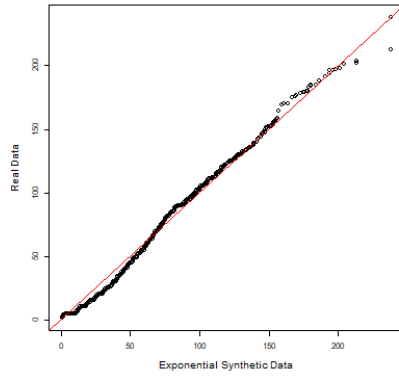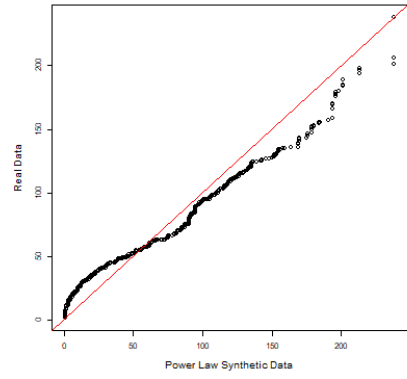

**College 172 Cohort 5**

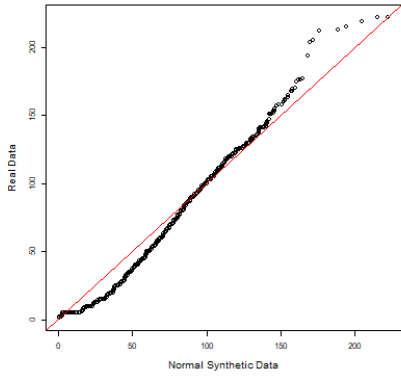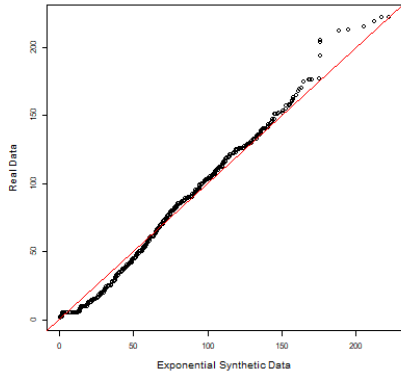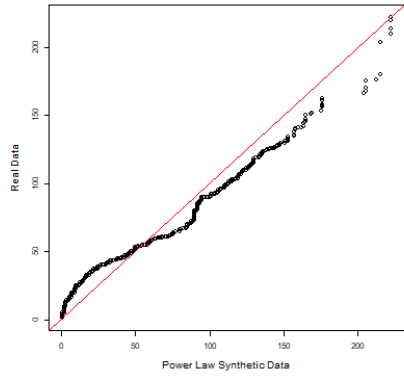

**College 180 Cohort 1**

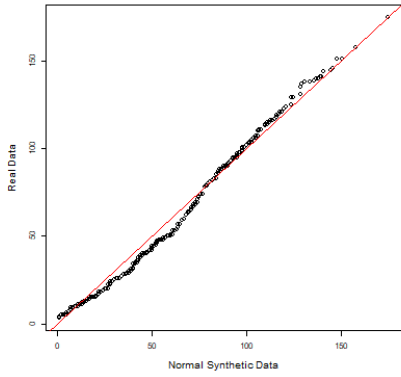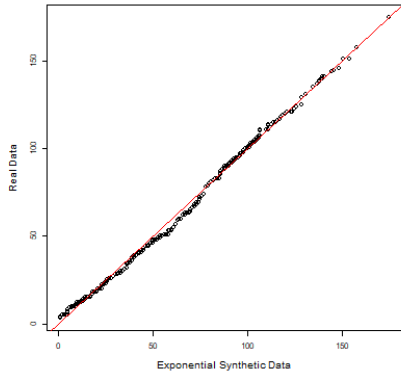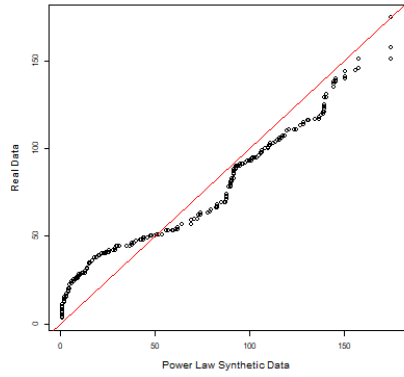

**College 180 Cohort 2**

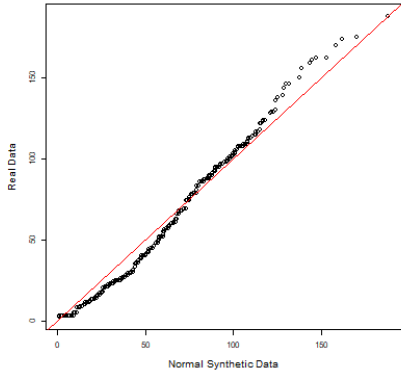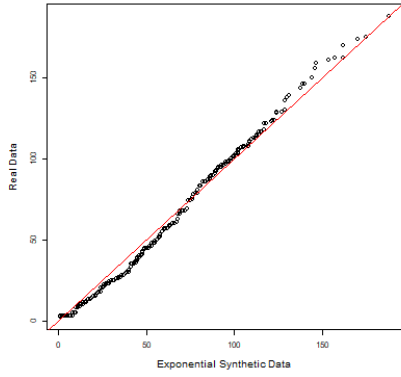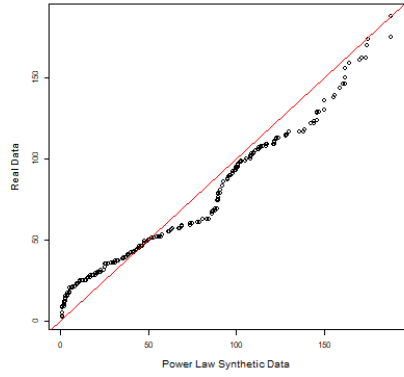

**College 180 Cohort 3**

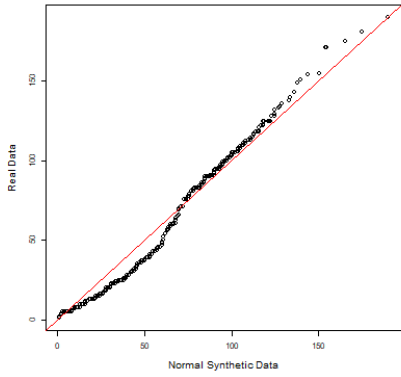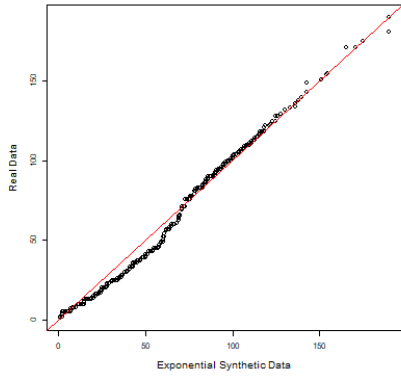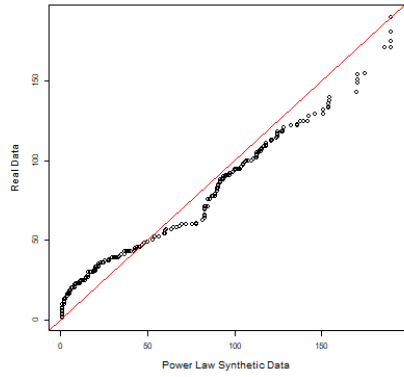

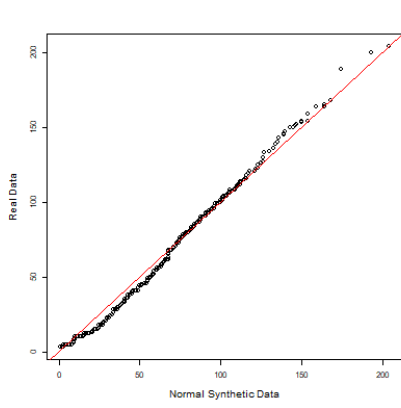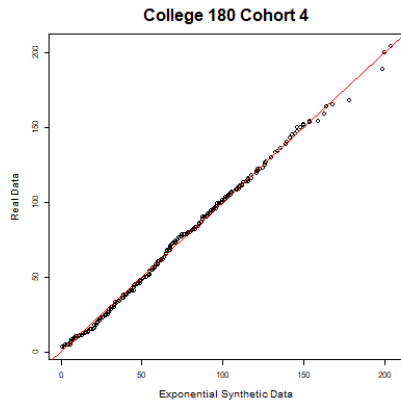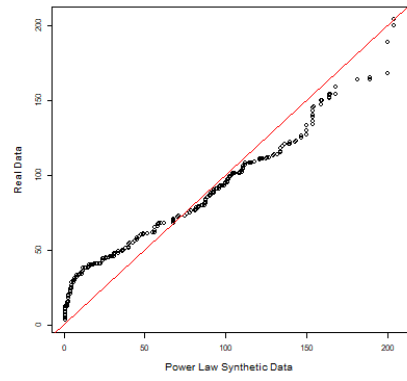

College 180 Cohort 4

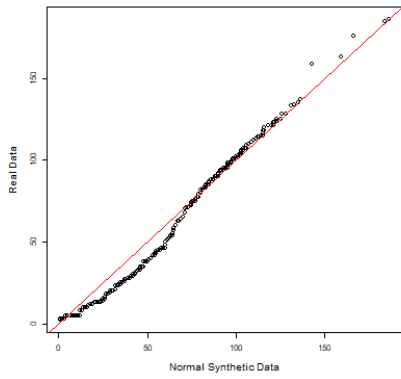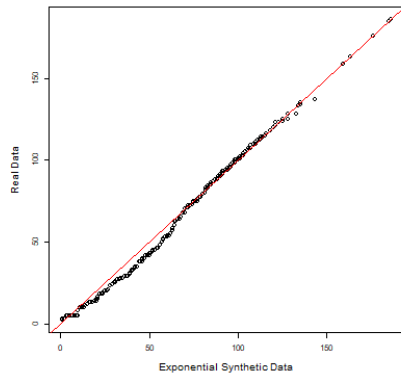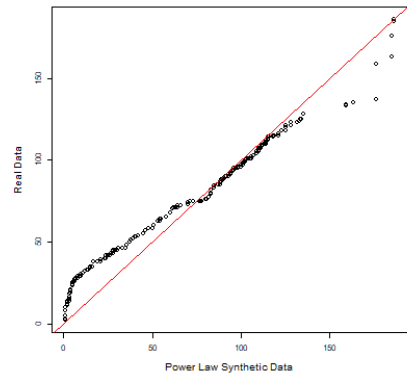

College 180 Cohort 5

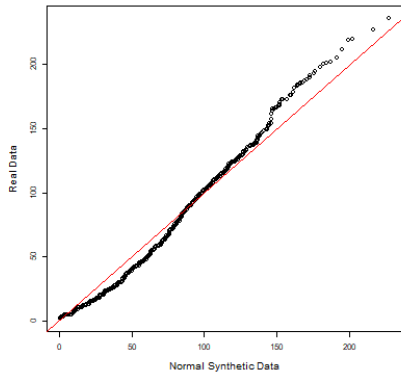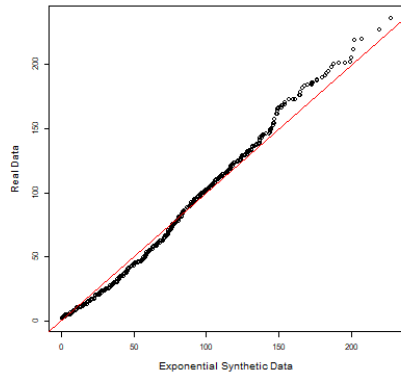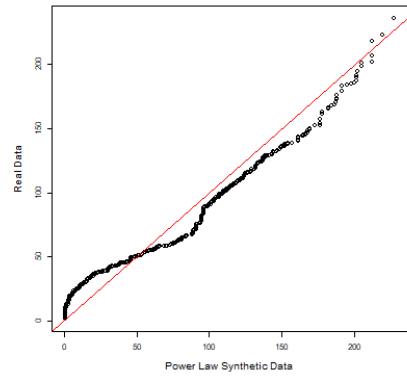

College 190 Cohort 1

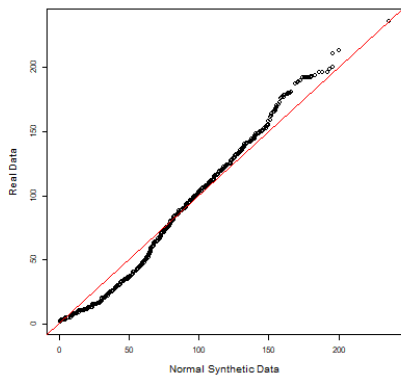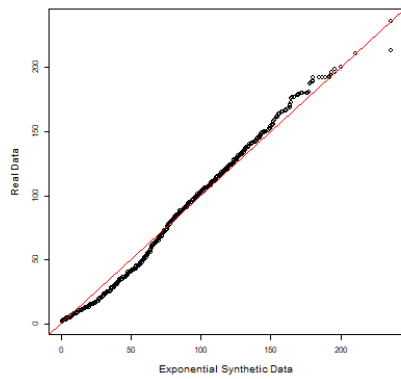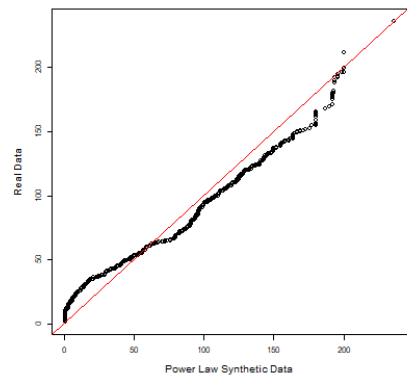

College 190 Cohort 2

**College 190 Cohort 3**

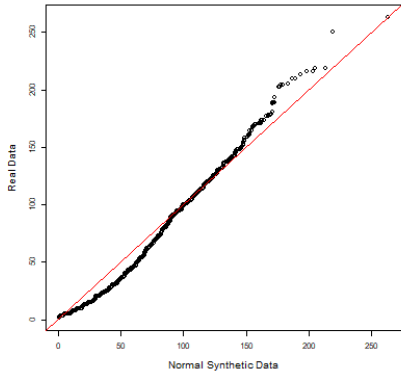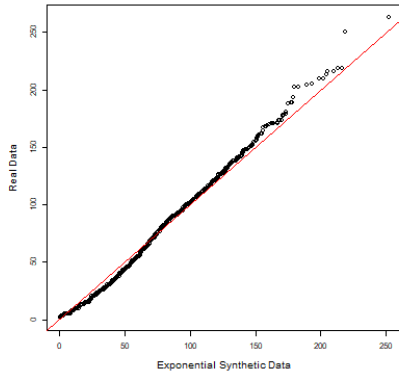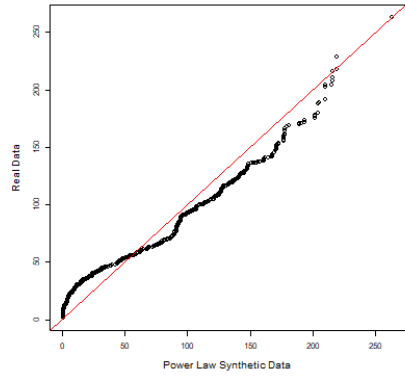

**College 190 Cohort 4**

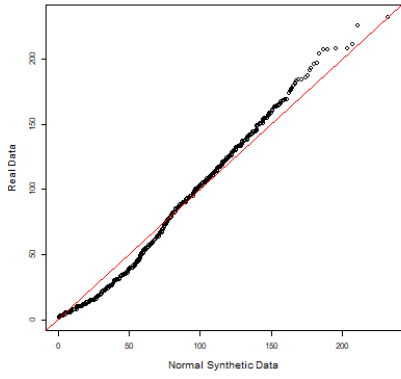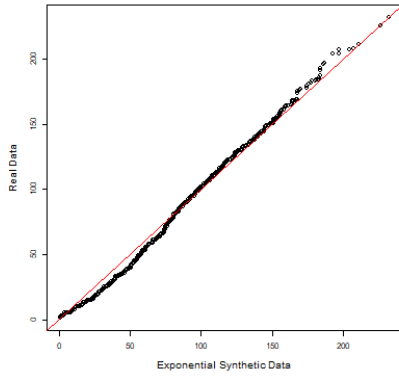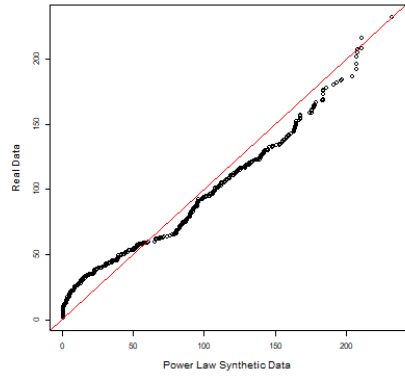

**College 190 Cohort 5**

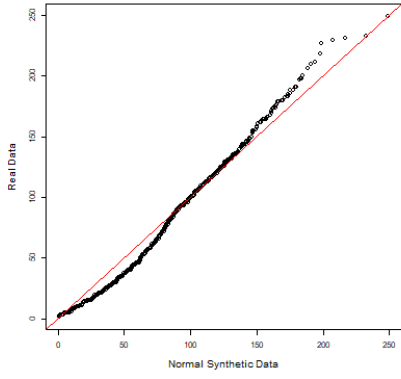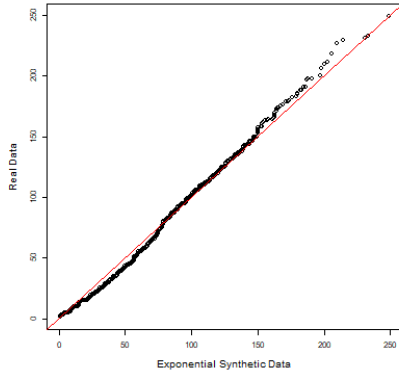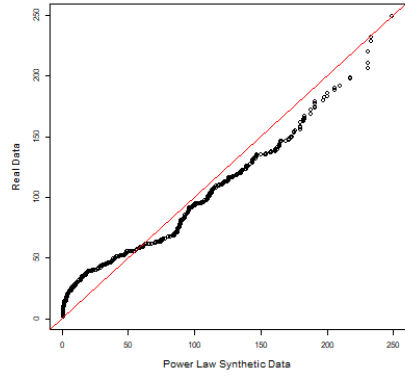

**College 200 Cohort 1**

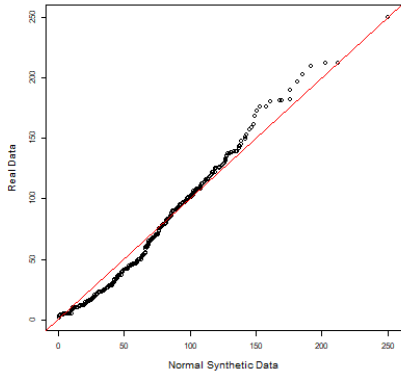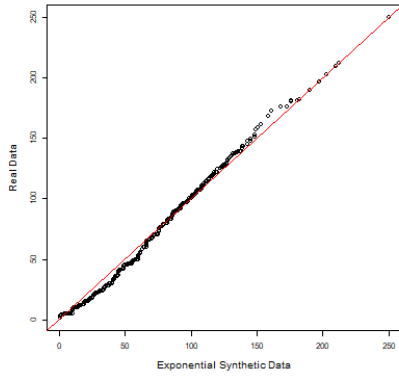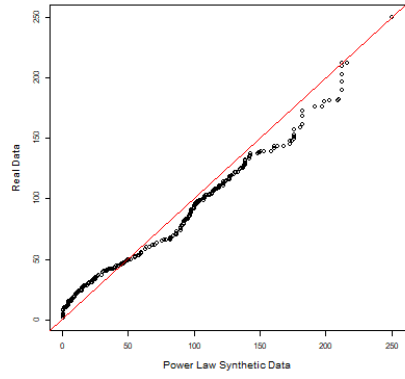

**College 200 Cohort 2**

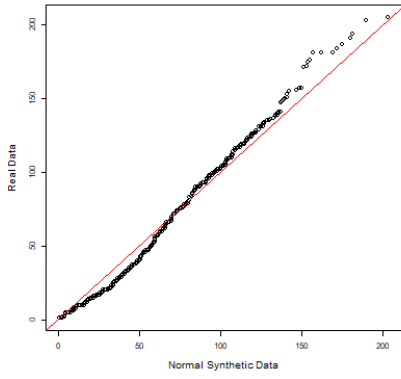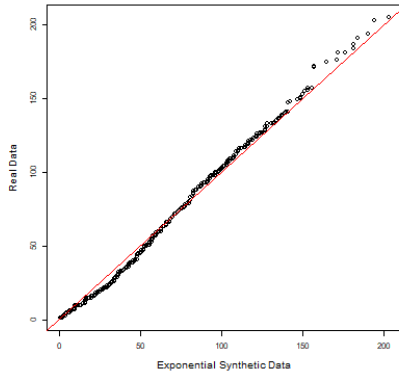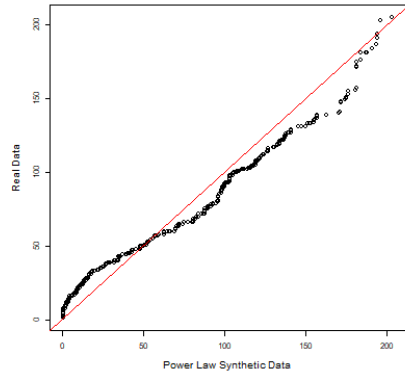

**College 200 Cohort 3**

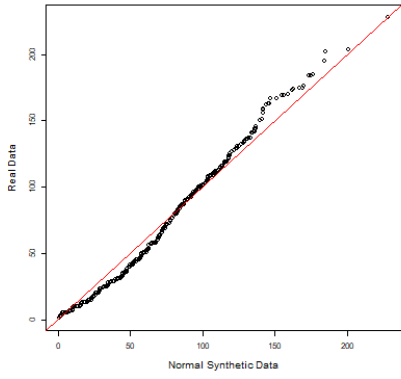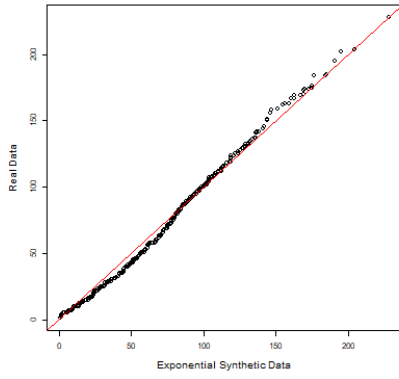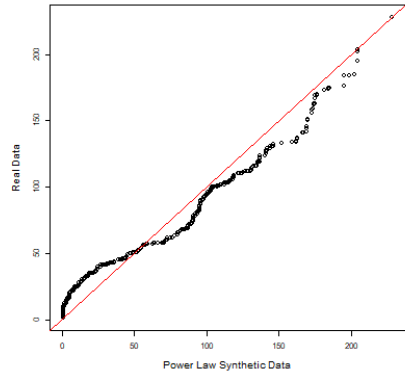

**College 200 Cohort 4**

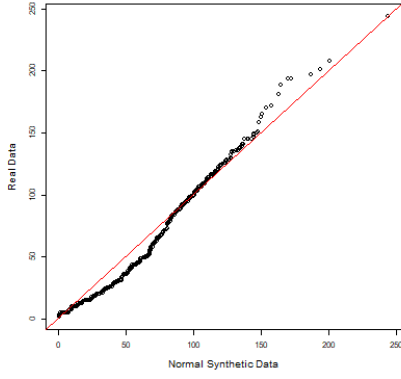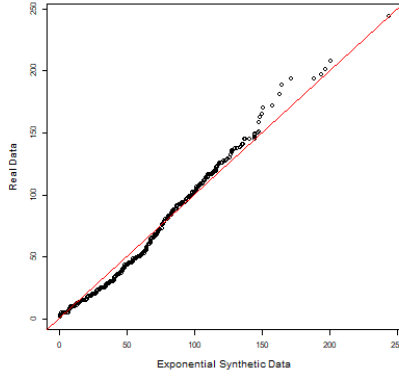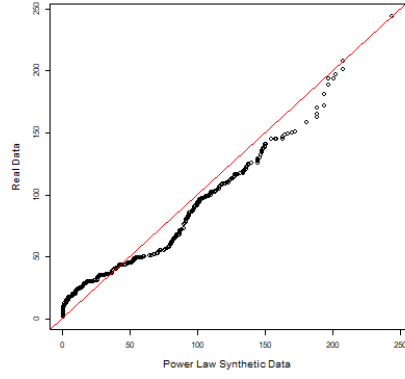

**College 200 Cohort 5**

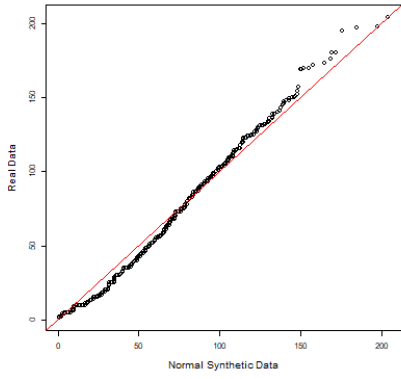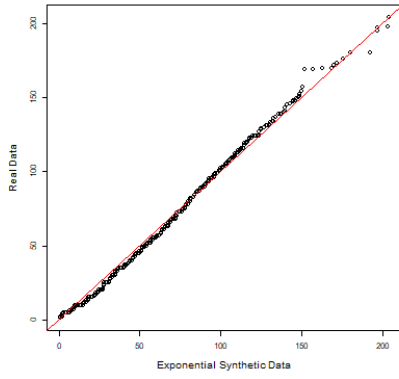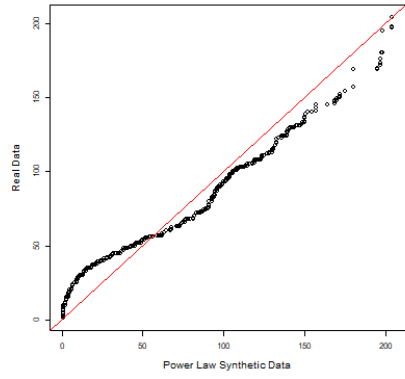

College 210 Cohort 1

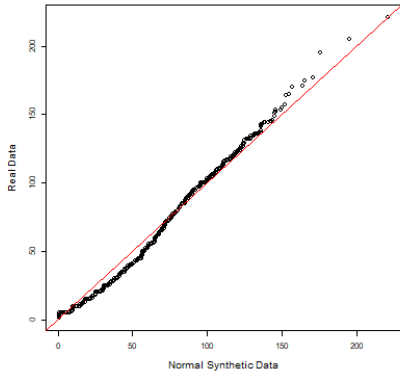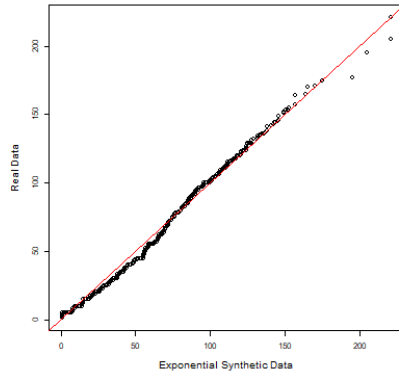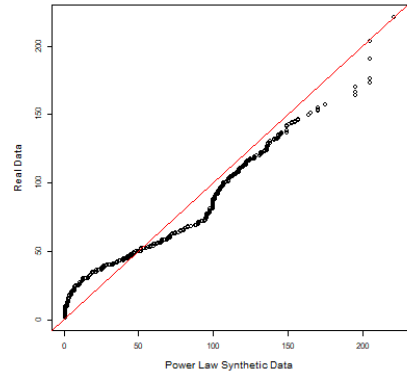

College 210 Cohort 2

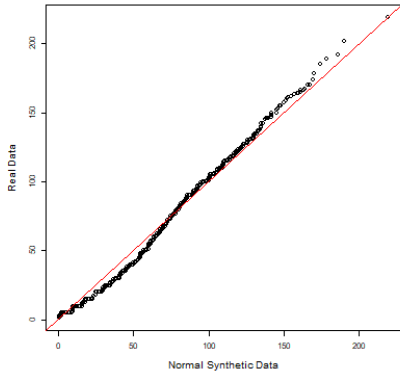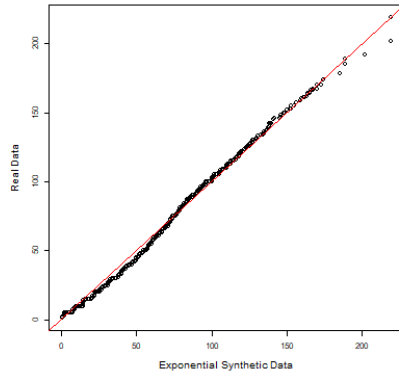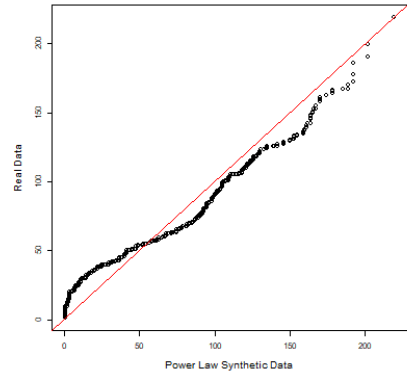

College 210 Cohort 3

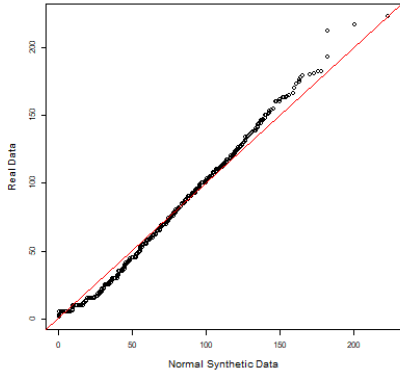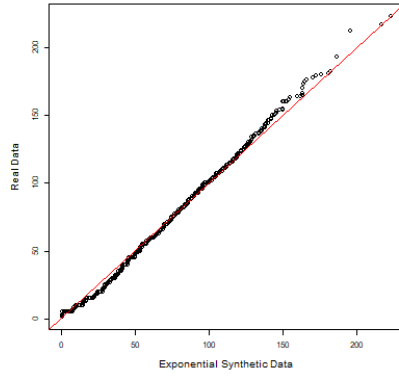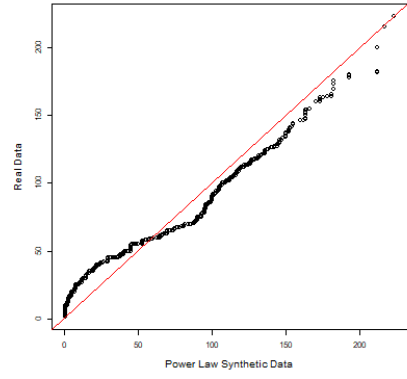

College 210 Cohort 4

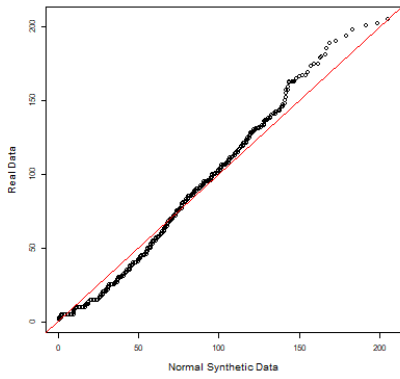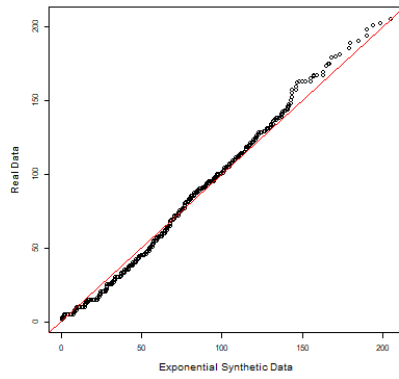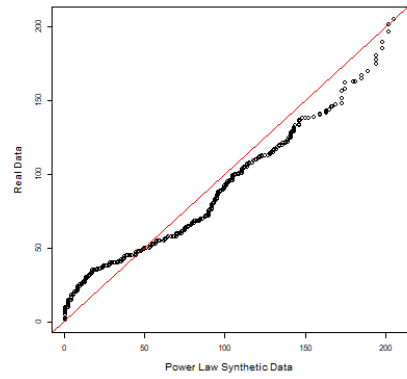



**College 210 Cohort 5**

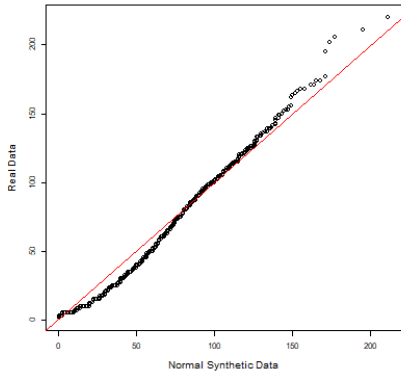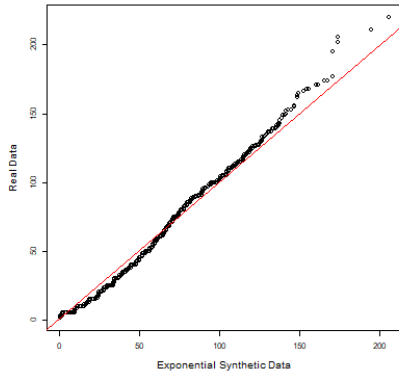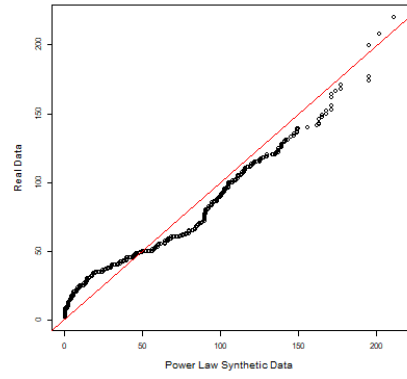

**College 220 Cohort 1**

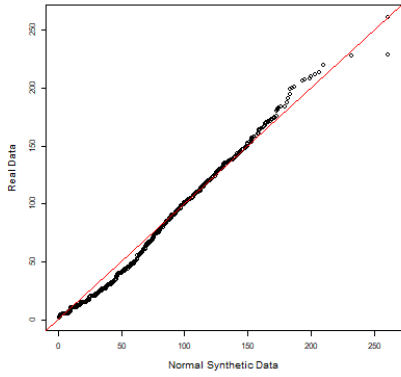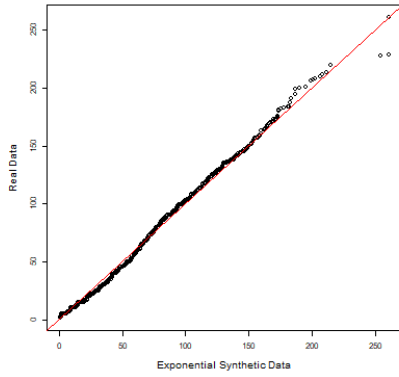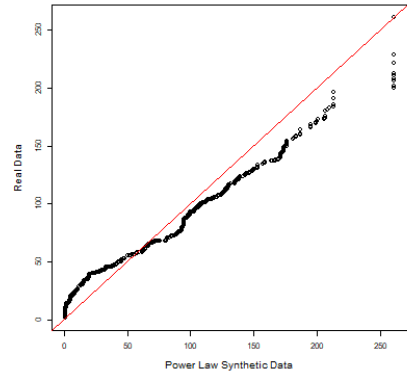

**College 220 Cohort 2**

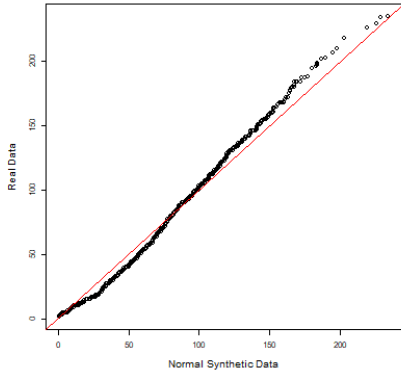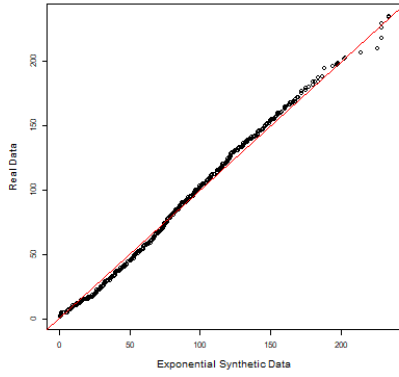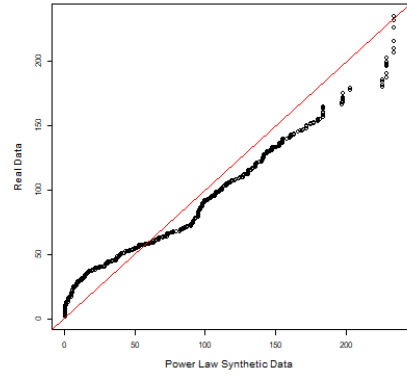

**College 220 Cohort 3**

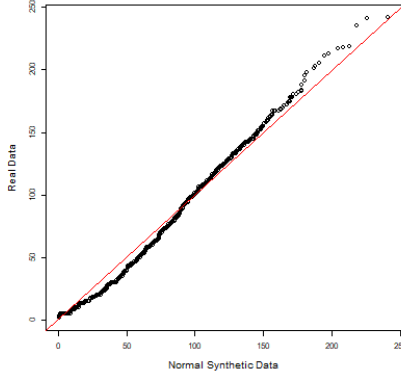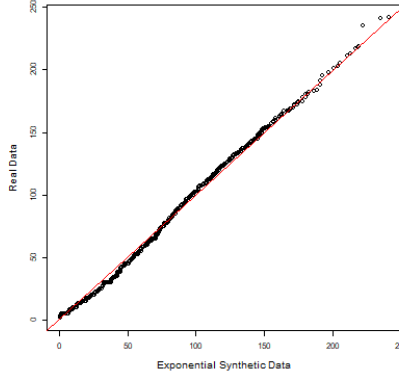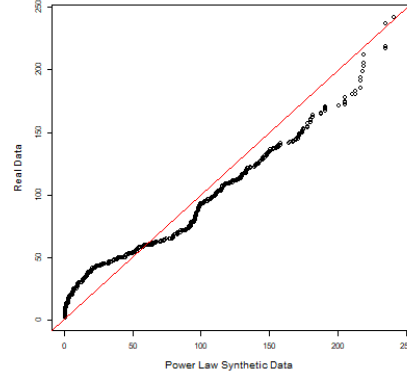

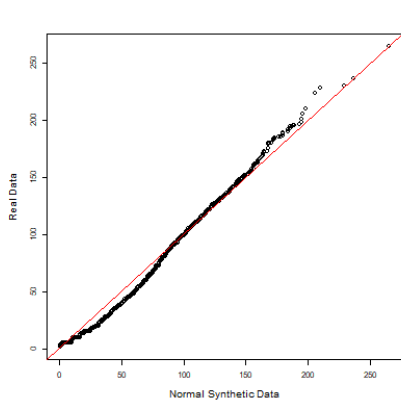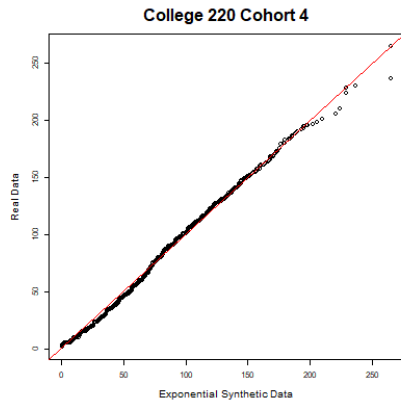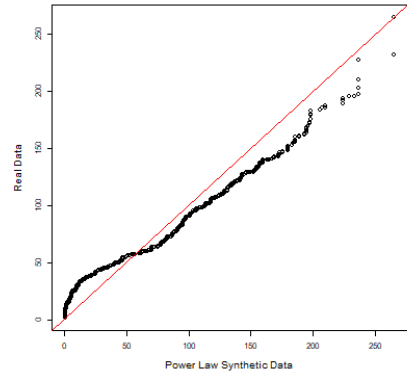

College 220 Cohort 4

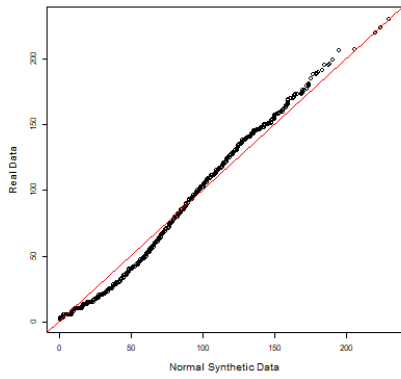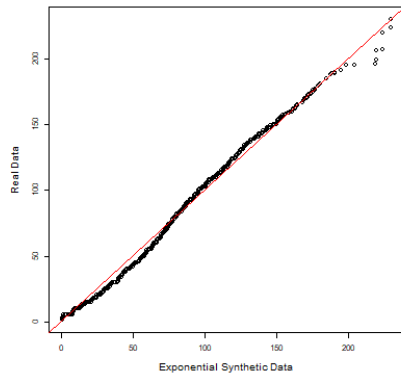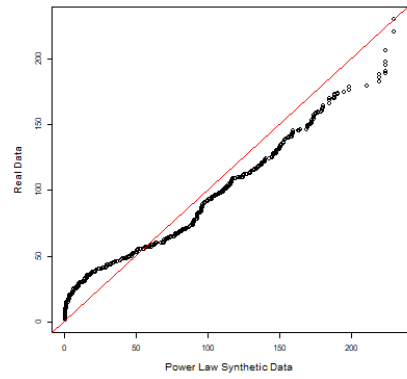

College 220 Cohort 5

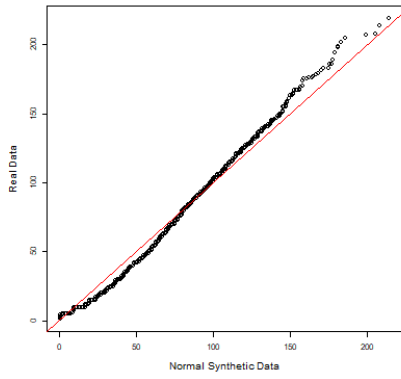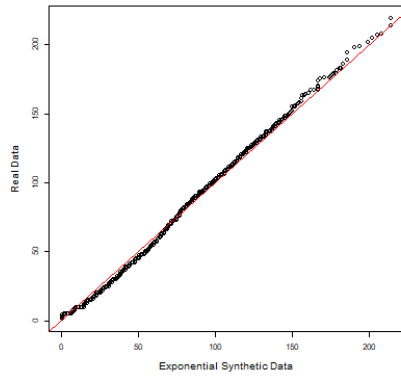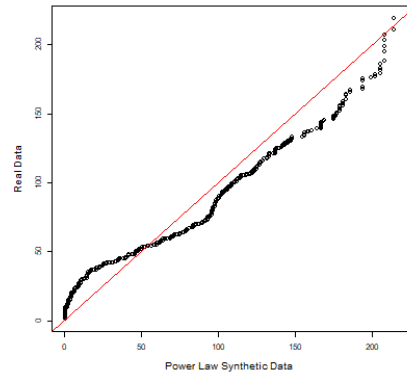

College 230 Cohort 1

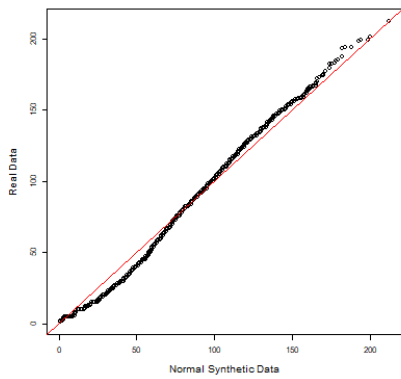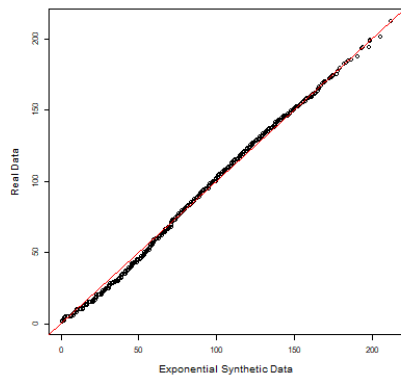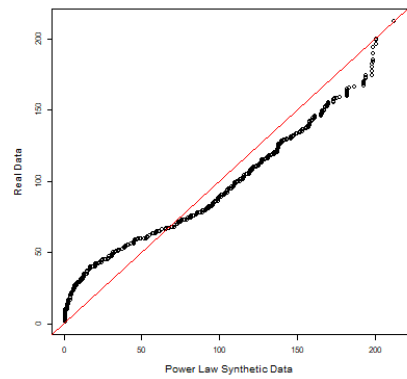

College 230 Cohort 2



**College 240 Cohort 2**

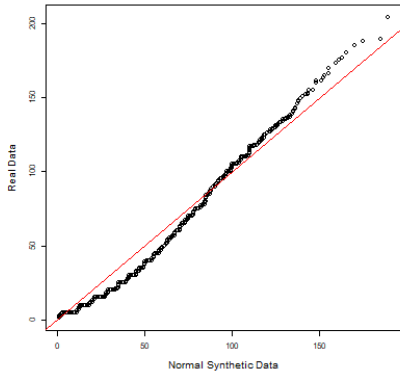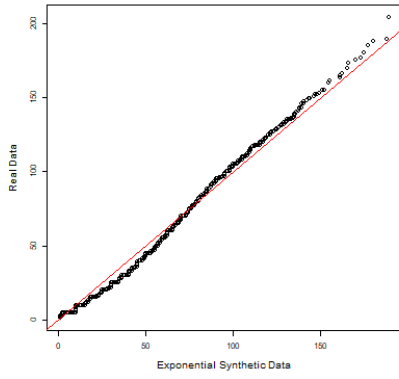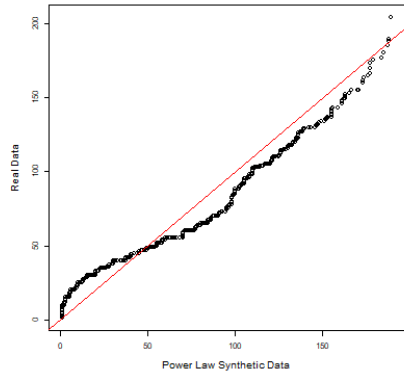

**College 240 Cohort 3**

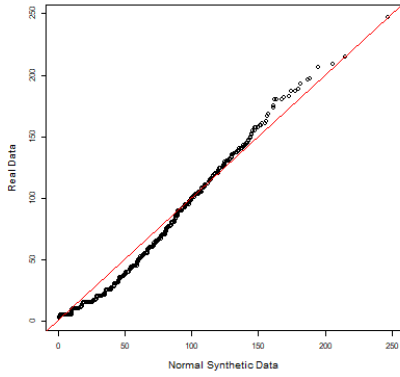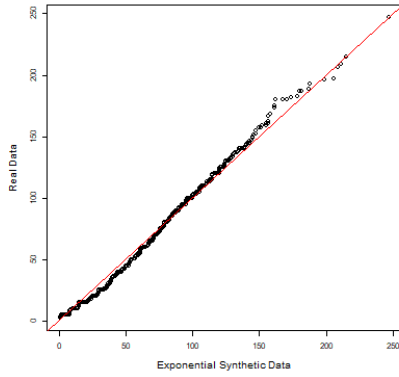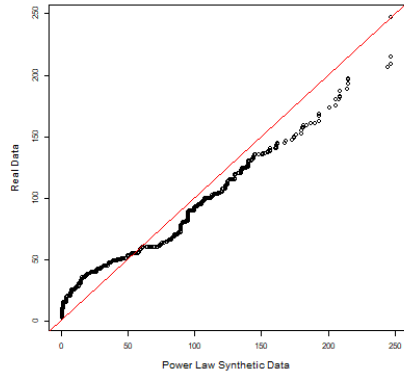

**College 240 Cohort 4**

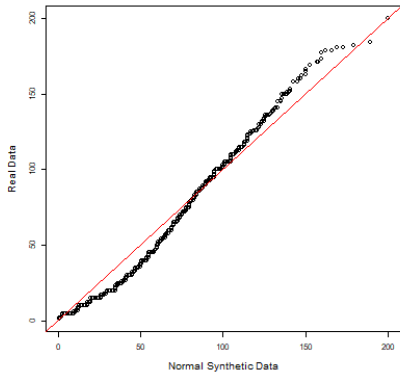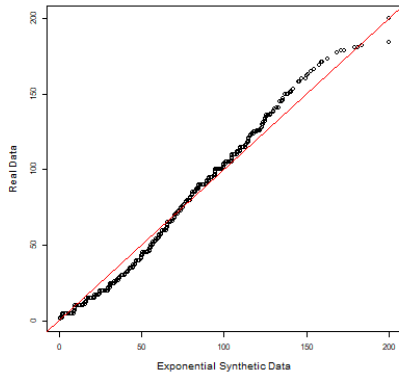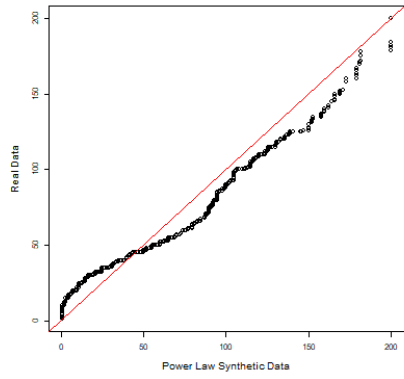

**College 240 Cohort 5**

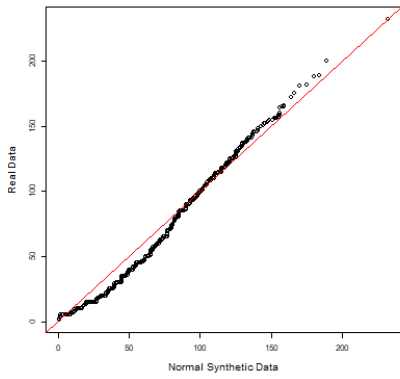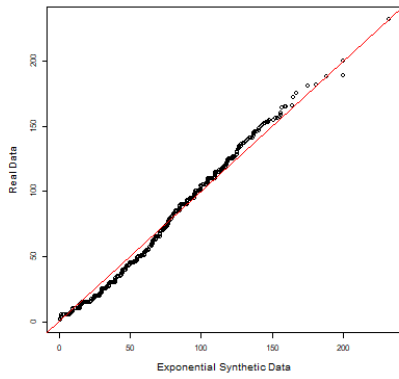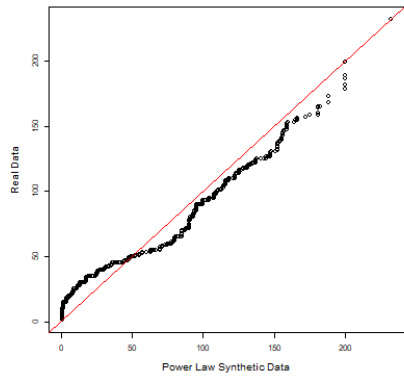

**College 300 Cohort 1**

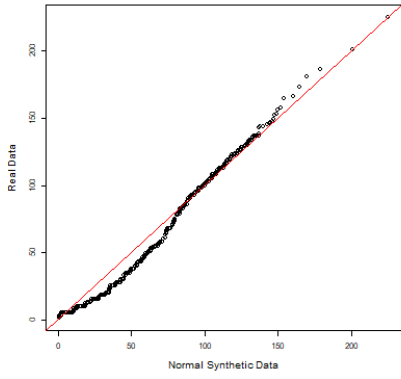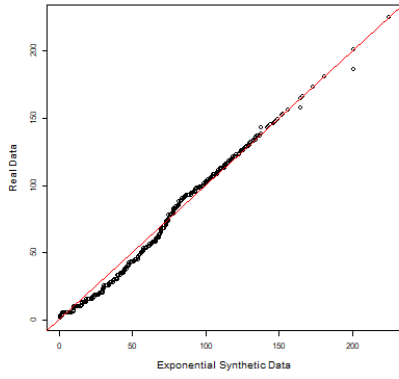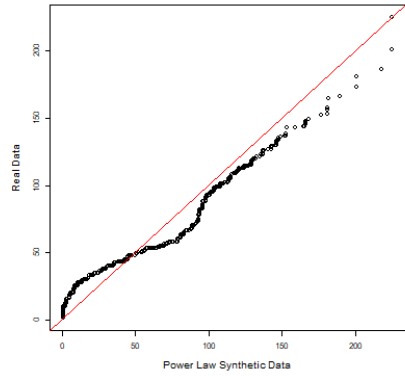

**College 300 Cohort 2**

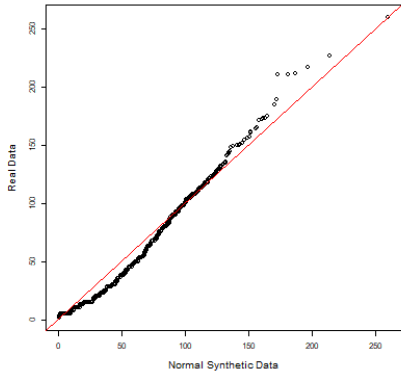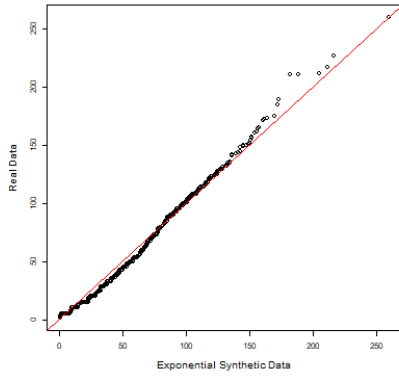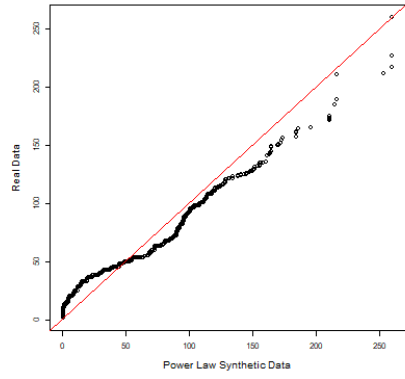

**College 300 Cohort 3**

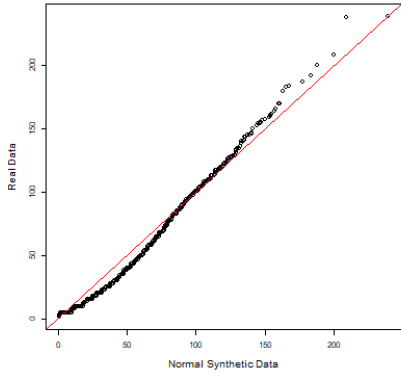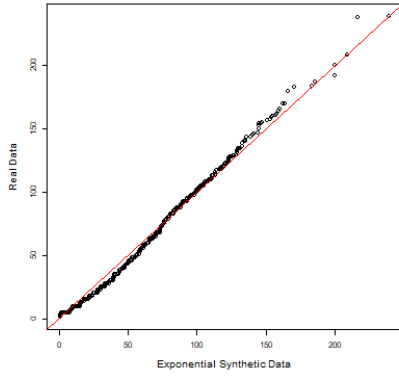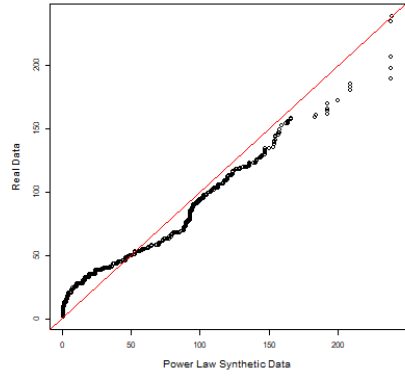

**College 300 Cohort 4**

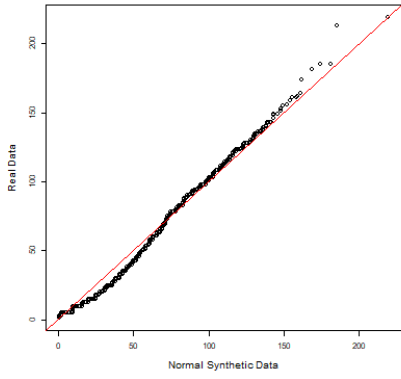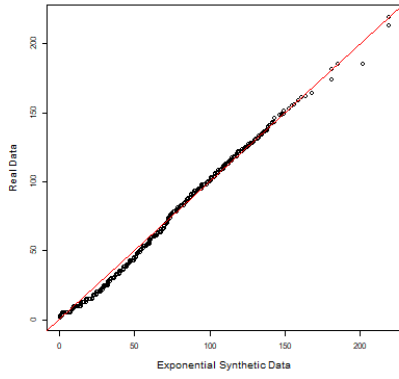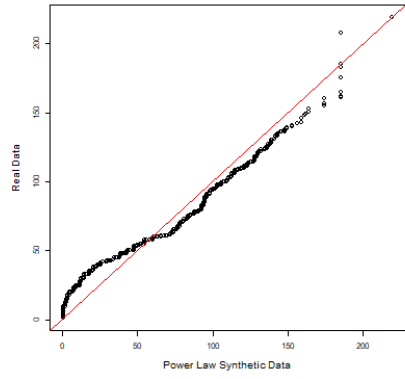

**College 300 Cohort 5**

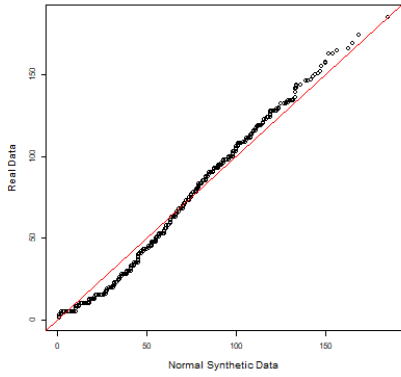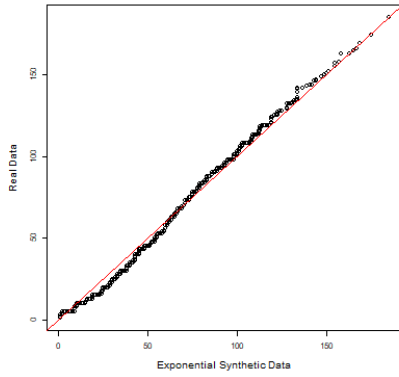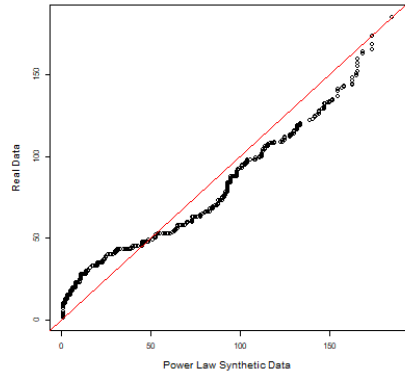

**Fig. S3.** Summary statistics by cohort. A cohort is the set of all students who started at a given college in a given academic year.

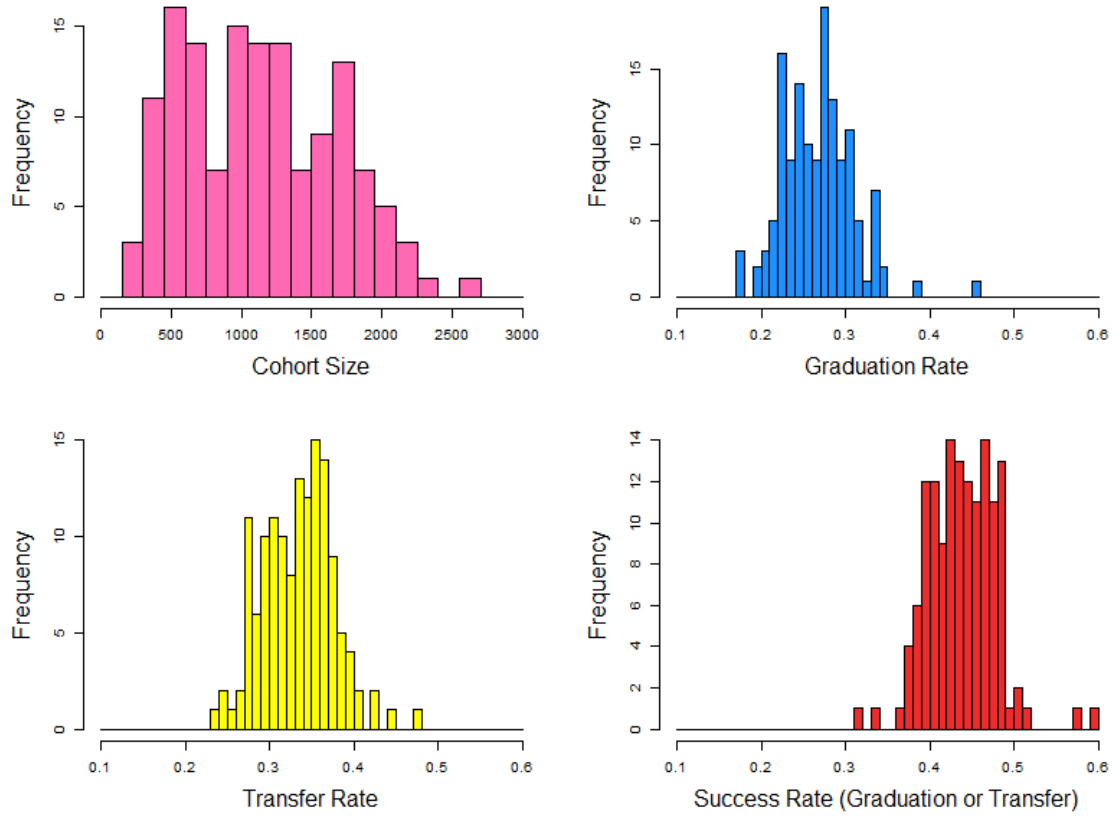

**Fig. S4.** Summary statistics by college.

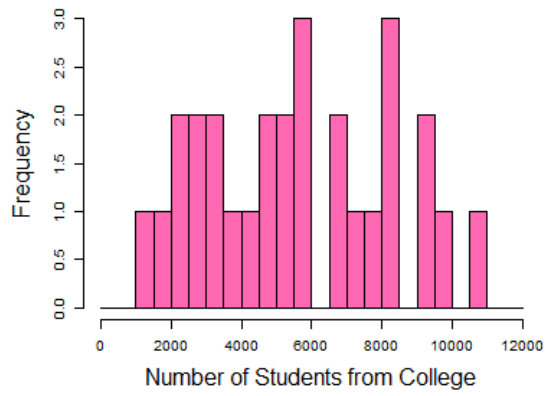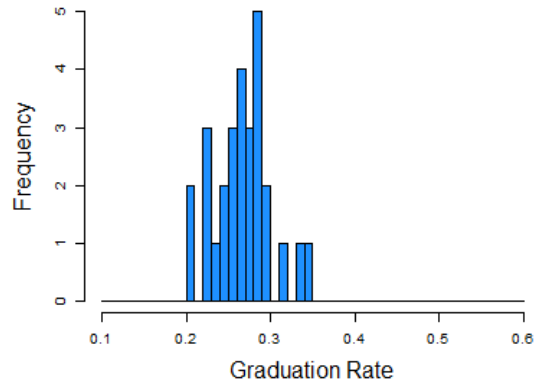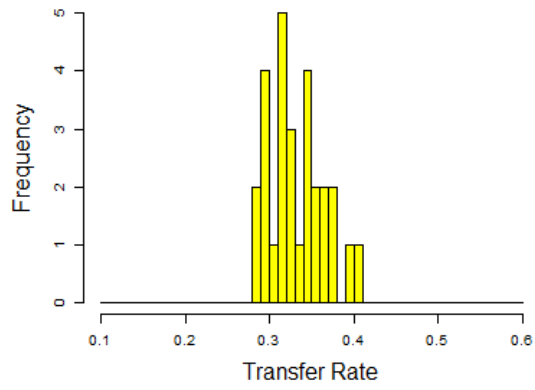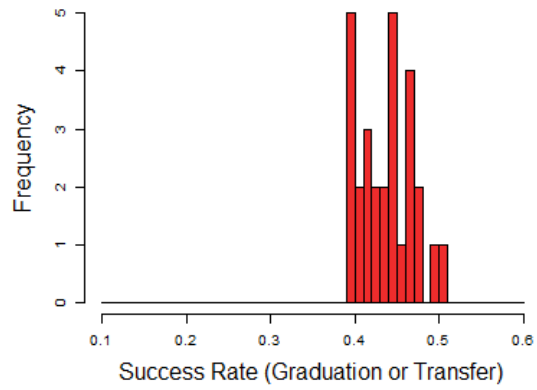



**Fig. S5. Inferred probability mass function of either transferring or graduating (success point) at a given number of credits for the complete dataset of students. Most classes are 5 credits, so the probability of a success point at a multiple of 5 is higher.**

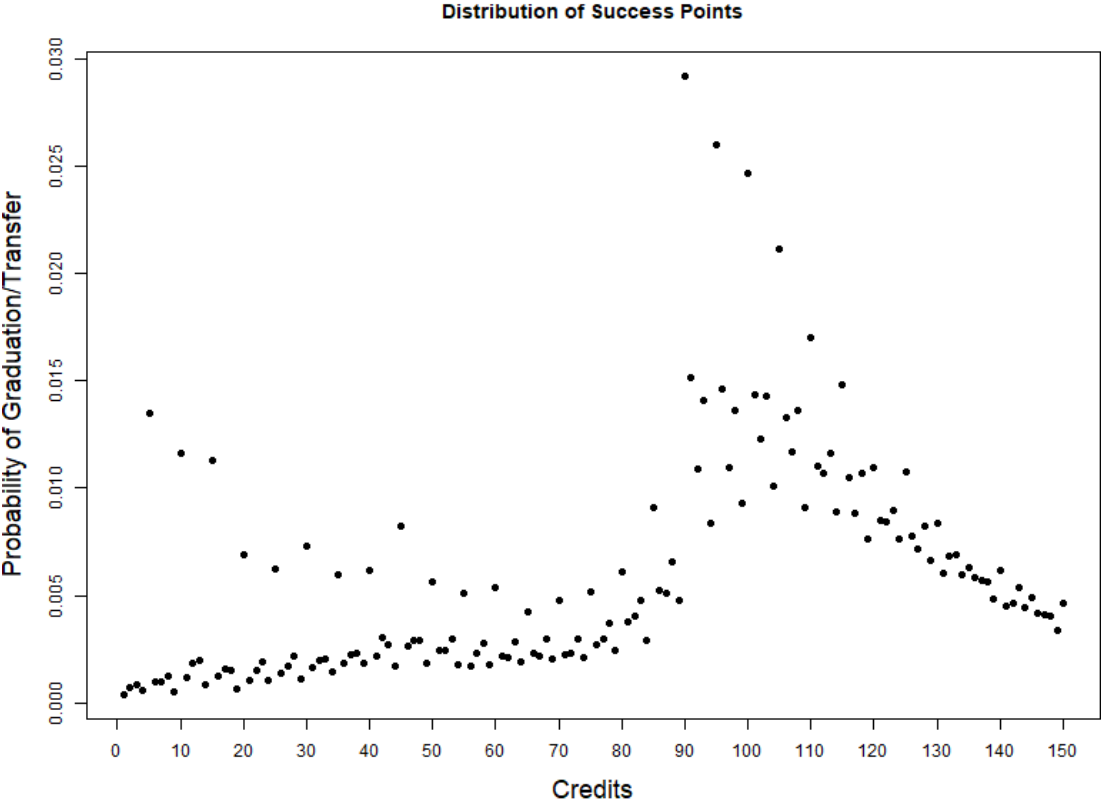

**Fig. S6. Probability that a randomly chosen student will graduate/transfer at a given credit level (smoothed).** Specifically, this is the smoothed inferred probability mass function (Figure S5) of either transferring or graduating (success point) at a given number of credits for the complete dataset of students.

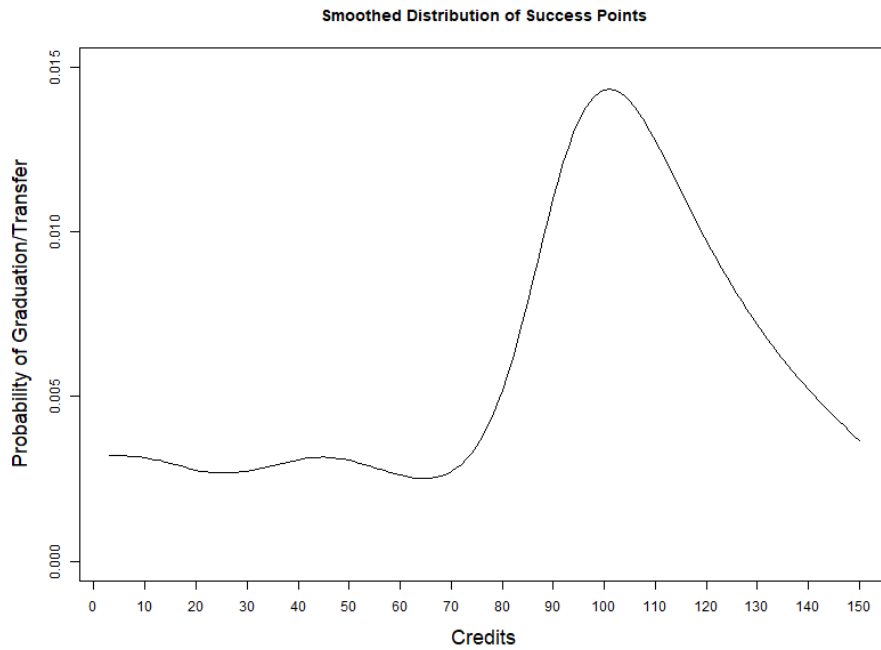

**Fig. S7. Visual description of the creation of the data used in the QQ plots and in the reconstruction of dropout rates.** Each value in the histogram in the bottom right was generated by taking the minimum of a randomly chosen point from the bottom left and from the top right distributions.

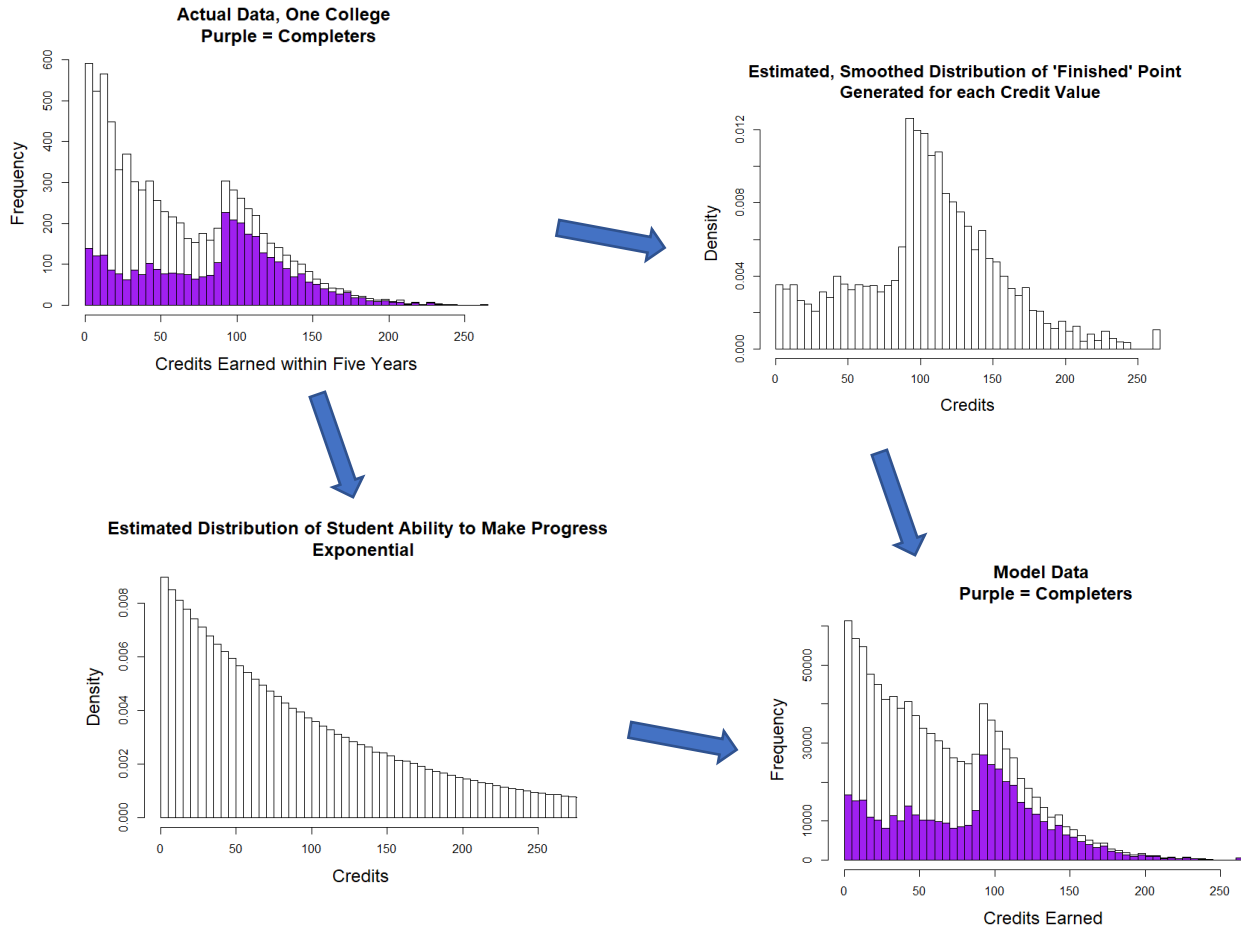

**Table S1. Akaike Information Criterion (AIC) values for each college-year cohort and model.** Smaller AIC's represent a better fit.

|                      | Normal | Exponential | Power Law |
|----------------------|--------|-------------|-----------|
| College 10, Cohort 1 | 2750   | 2726        | 3069      |
| College 10, Cohort 2 | 2957   | 2915        | 3222      |
| College 10, Cohort 3 | 2796   | 2759        | 3026      |
| College 10, Cohort 4 | 3188   | 3153        | 3515      |
| College 10, Cohort 5 | 3567   | 3514        | 3865      |
| College 20, Cohort 1 | 1868   | 1829        | 1971      |
| College 20, Cohort 2 | 1686   | 1670        | 1907      |
| College 20, Cohort 3 | 2221   | 2185        | 2320      |
| College 20, Cohort 4 | 1707   | 1682        | 1828      |
| College 20, Cohort 5 | 2282   | 2254        | 2525      |
| College 30, Cohort 1 | 5403   | 5348        | 5936      |
| College 30, Cohort 2 | 5902   | 5847        | 6507      |
| College 30, Cohort 3 | 6392   | 6337        | 7063      |
| College 30, Cohort 4 | 7941   | 7854        | 8675      |
| College 30, Cohort 5 | 9550   | 9474        | 10583     |
| College 40, Cohort 1 | 8361   | 8240        | 9045      |
| College 40, Cohort 2 | 8566   | 8456        | 9367      |
| College 40, Cohort 3 | 8665   | 8552        | 9418      |
| College 40, Cohort 4 | 9486   | 9360        | 10367     |
| College 40, Cohort 5 | 9780   | 9640        | 10786     |
| College 50, Cohort 1 | 9875   | 9761        | 10832     |
| College 50, Cohort 2 | 9979   | 9874        | 10981     |
| College 50, Cohort 3 | 11470  | 11306       | 12442     |
| College 50, Cohort 4 | 13335  | 13185       | 14653     |
| College 50, Cohort 5 | 12024  | 11898       | 13295     |
| College 62, Cohort 1 | 9613   | 9499        | 10634     |
| College 62, Cohort 2 | 7526   | 7455        | 8302      |
| College 62, Cohort 3 | 8098   | 8043        | 9052      |
| College 62, Cohort 4 | 8238   | 8156        | 9079      |
| College 62, Cohort 5 | 8572   | 8498        | 9467      |
| College 63, Cohort 1 | 7753   | 7593        | 8290      |
| College 63, Cohort 2 | 7826   | 7680        | 8520      |
| College 63, Cohort 3 | 6214   | 6095        | 6527      |

|                       |       |       |       |
|-----------------------|-------|-------|-------|
| College 63, Cohort 4  | 7700  | 7561  | 8363  |
| College 63, Cohort 5  | 8127  | 7973  | 8738  |
| College 64, Cohort 1  | 3668  | 3580  | 3833  |
| College 64, Cohort 2  | 3751  | 3656  | 3972  |
| College 64, Cohort 3  | 3614  | 3517  | 3772  |
| College 64, Cohort 4  | 4291  | 4211  | 4651  |
| College 64, Cohort 5  | 4141  | 4050  | 4336  |
| College 70, Cohort 1  | 6735  | 6682  | 7509  |
| College 70, Cohort 2  | 5488  | 5447  | 6146  |
| College 70, Cohort 3  | 6359  | 6321  | 7040  |
| College 70, Cohort 4  | 6328  | 6282  | 7010  |
| College 70, Cohort 5  | 6345  | 6289  | 6997  |
| College 90, Cohort 1  | 12277 | 12129 | 13492 |
| College 90, Cohort 2  | 15080 | 14876 | 16383 |
| College 90, Cohort 3  | 13030 | 12880 | 14161 |
| College 90, Cohort 4  | 12539 | 12405 | 13688 |
| College 90, Cohort 5  | 12679 | 12551 | 13835 |
| College 100, Cohort 1 | 13209 | 13148 | 14927 |
| College 100, Cohort 2 | 13423 | 13364 | 15123 |
| College 100, Cohort 3 | 14043 | 13979 | 15741 |
| College 100, Cohort 4 | 12666 | 12584 | 14055 |
| College 100, Cohort 5 | 12977 | 12865 | 14376 |
| College 111, Cohort 1 | 7633  | 7549  | 8475  |
| College 111, Cohort 2 | 7547  | 7455  | 8248  |
| College 111, Cohort 3 | 6631  | 6581  | 7322  |
| College 111, Cohort 4 | 6828  | 6781  | 7611  |
| College 111, Cohort 5 | 6523  | 6484  | 7265  |
| College 112, Cohort 1 | 6122  | 6065  | 6772  |
| College 112, Cohort 2 | 6245  | 6181  | 6839  |
| College 112, Cohort 3 | 6574  | 6517  | 7247  |
| College 112, Cohort 4 | 5463  | 5417  | 6005  |
| College 112, Cohort 5 | 4691  | 4646  | 5156  |
| College 121, Cohort 1 | 2946  | 2927  | 3311  |
| College 121, Cohort 2 | 3075  | 3041  | 3339  |
| College 121, Cohort 3 | 2874  | 2849  | 3145  |
| College 121, Cohort 4 | 3410  | 3372  | 3691  |
| College 121, Cohort 5 | 2520  | 2482  | 2656  |
| College 130, Cohort 1 | 3004  | 2968  | 3249  |
| College 130, Cohort 2 | 4136  | 4085  | 4507  |

|                       |       |       |       |
|-----------------------|-------|-------|-------|
| College 130, Cohort 3 | 4341  | 4287  | 4684  |
| College 130, Cohort 4 | 4341  | 4283  | 4745  |
| College 130, Cohort 5 | 4747  | 4679  | 5098  |
| College 140, Cohort 1 | 9103  | 8997  | 9915  |
| College 140, Cohort 2 | 10174 | 10065 | 11062 |
| College 140, Cohort 3 | 11803 | 11685 | 12927 |
| College 140, Cohort 4 | 18412 | 18195 | 20231 |
| College 140, Cohort 5 | 14895 | 14623 | 16104 |
| College 150, Cohort 1 | 5325  | 5280  | 5913  |
| College 150, Cohort 2 | 5070  | 5034  | 5613  |
| College 150, Cohort 3 | 5799  | 5754  | 6342  |
| College 150, Cohort 4 | 6266  | 6194  | 6840  |
| College 150, Cohort 5 | 6267  | 6207  | 6831  |
| College 160, Cohort 1 | 4092  | 4064  | 4569  |
| College 160, Cohort 2 | 4113  | 4087  | 4612  |
| College 160, Cohort 3 | 4804  | 4776  | 5394  |
| College 160, Cohort 4 | 4304  | 4262  | 4705  |
| College 160, Cohort 5 | 4737  | 4697  | 5213  |
| College 171, Cohort 1 | 4613  | 4579  | 5180  |
| College 171, Cohort 2 | 4547  | 4501  | 5100  |
| College 171, Cohort 3 | 4000  | 3964  | 4363  |
| College 171, Cohort 4 | 3669  | 3646  | 4104  |
| College 171, Cohort 5 | 2655  | 2642  | 2970  |
| College 172, Cohort 1 | 12262 | 12056 | 13145 |
| College 172, Cohort 2 | 11257 | 11141 | 12515 |
| College 172, Cohort 3 | 13179 | 12930 | 13806 |
| College 172, Cohort 4 | 12038 | 11881 | 13005 |
| College 172, Cohort 5 | 12086 | 11892 | 12890 |
| College 180, Cohort 1 | 2104  | 2094  | 2391  |
| College 180, Cohort 2 | 2348  | 2316  | 2498  |
| College 180, Cohort 3 | 2408  | 2380  | 2621  |
| College 180, Cohort 4 | 2252  | 2242  | 2518  |
| College 180, Cohort 5 | 1518  | 1506  | 1645  |
| College 190, Cohort 1 | 9970  | 9839  | 10815 |
| College 190, Cohort 2 | 11231 | 11081 | 12077 |
| College 190, Cohort 3 | 11343 | 11192 | 12285 |
| College 190, Cohort 4 | 10197 | 10077 | 11007 |
| College 190, Cohort 5 | 10460 | 10343 | 11404 |
| College 200, Cohort 1 | 2306  | 2276  | 2461  |

|                       |       |       |       |
|-----------------------|-------|-------|-------|
| College 200, Cohort 2 | 3202  | 3165  | 3453  |
| College 200, Cohort 3 | 3537  | 3497  | 3858  |
| College 200, Cohort 4 | 3682  | 3627  | 3986  |
| College 200, Cohort 5 | 4062  | 4026  | 4468  |
| College 210, Cohort 1 | 7032  | 6963  | 7776  |
| College 210, Cohort 2 | 7914  | 7847  | 8768  |
| College 210, Cohort 3 | 8112  | 8037  | 8928  |
| College 210, Cohort 4 | 10750 | 10629 | 11761 |
| College 210, Cohort 5 | 10390 | 10259 | 11262 |
| College 220, Cohort 1 | 8835  | 8770  | 9883  |
| College 220, Cohort 2 | 9142  | 9060  | 10145 |
| College 220, Cohort 3 | 10811 | 10713 | 12001 |
| College 220, Cohort 4 | 11044 | 10948 | 12292 |
| College 220, Cohort 5 | 12373 | 12245 | 13659 |
| College 230, Cohort 1 | 10038 | 9941  | 11158 |
| College 230, Cohort 2 | 10276 | 10200 | 11450 |
| College 230, Cohort 3 | 10172 | 10107 | 11371 |
| College 230, Cohort 4 | 11159 | 11076 | 12511 |
| College 230, Cohort 5 | 11360 | 11308 | 12849 |
| College 240, Cohort 1 | 7249  | 7160  | 7916  |
| College 240, Cohort 2 | 6390  | 6292  | 6921  |
| College 240, Cohort 3 | 6401  | 6330  | 7046  |
| College 240, Cohort 4 | 6974  | 6866  | 7552  |
| College 240, Cohort 5 | 7048  | 6959  | 7696  |
| College 300, Cohort 1 | 5721  | 5644  | 6233  |
| College 300, Cohort 2 | 5952  | 5876  | 6491  |
| College 300, Cohort 3 | 6725  | 6648  | 7328  |
| College 300, Cohort 4 | 7260  | 7198  | 7984  |
| College 300, Cohort 5 | 7463  | 7378  | 8185  |

**Table S2. Summary statistics by student.**

|                                                     |         |
|-----------------------------------------------------|---------|
| Number of students                                  | 156,712 |
| Transferred                                         | 32.8%   |
| Graduated                                           | 26.2%   |
| Transferred or Graduated                            | 43.2%   |
| Credits earned (mean)                               | 60.4    |
| Credits earned (sd)                                 | 45.9    |
| Percent underrepresented minority (not white/Asian) | 28.7%   |
| Male                                                | 47.4%   |
| Age (mean)                                          | 21.4    |
| Age (sd)                                            | 7.2     |



## REFERENCES AND NOTES

1. U.S. Department of Education, *Digest of Education Statistics* (U.S. Department of Education, 2017); [https://nces.ed.gov/programs/digest/d17/tables/dt17\\_219.57.asp](https://nces.ed.gov/programs/digest/d17/tables/dt17_219.57.asp).
2. D. Shapiro, A. Dunder, F. Huie, P. K. Wakhungu, A. Bhimdiwala, S. E. Wilson, Completing college: A national view of student completion rates—Fall 2012 Cohort (Signature Report No. 16, National Student Clearinghouse Research Center, 2018); <https://nscresearchcenter.org/wp-content/uploads/SignatureReport16.pdf>.
3. J. Scott-Clayton, P. M. Crosta, C. R. Belfield, Improving the targeting of treatment: Evidence from college remediation. *Educ. Eval. Policy Anal.* **36**, 371–393 (2014).
4. M. C. Long, D. Conger, P. Iatarola, Effects of high school course-taking on secondary and postsecondary success. *Am. Educ. Res. J.* **49**, 285–322 (2012).
5. S. F. Porchea, J. Allen, S. Robbins, R. P. Phelps, Predictors of long-term enrollment and degree outcomes for community college students: Integrating academic, psychosocial, socio-demographic, and situational. *J. Higher Educ.* **81**, 680–708 (2010).
6. E. T. Pascarella, P. T. Terenzini, *How College Affects Students, Volume 2: A Third Decade of Research* (Jossey-Bass, 2005).
7. J. Johnson, J. Rochkind, *With Their Whole Lives Ahead of Them: Myths and Realities About Why So Many Students Fail to Finish College* (2009); <http://www.publicagenda.org/files/theirwholelivesaheadofthem.pdf>.
8. S. Goldrick-Rab, Addressing community college completion rates by securing students' basic needs. *New Dir. Community Coll.* **2018**, 7–16 (2018).
9. J. Boaler, Open and closed mathematics: Student experiences and understandings. *J. Res. Math. Educ.* **29**, 41–62 (1998).
10. R. D. Cox, You've got to learn the rules: A classroom-level look at low pass rates in developmental math. *Community Coll. Rev.* **43**, 264–286 (2015).
11. L. Cuban, *Inside the Black Box of Classroom Practice: Change Without Reform in American Education* (Harvard Education Press, 2013).
12. W. N. Grubb, *From Black Box to Pandora's Box: Evaluating Remedial/Developmental Education* (2001).
13. M. J. Mayhew, A. N. Rockenbach, N. A. Bowman, T. A. Seifert, G. C. Wolniak, E. T. Pascarella, P. T. Terenzini, *How College Affects Students, Volume 3: 21st Century Evidence that Higher Education Works* (Jossey-Bass, 2016).
14. R. Putnam, Social capital: Measurement and consequences. *Can. J. Policy Res.* **2**, 41–51 (2001).
15. J. S. Coleman, Social capital in the creation of human capital. *Am. J. Sociol.* **94**, S95–S120 (1988).

16. M. Granovetter, The strength of weak ties: A network theory revisited. *Sociol. Theory* **1**, 201–233 (1983).
17. G. S. Becker, *Human Capital: A Theoretical and Empirical Analysis with Special Reference to Education* (The University of Chicago Press, ed. 3, 1994).
18. G. Castex, E. K. Dechter, The changing roles of education and ability in wage determination. *J. Labor Econ.* **32**, 685–710 (2014).
19. D. J. Deming, The growing importance of social skills in the labor market. *Q. J. Econ.* **132**, 1593–1640 (2017).
20. A. Killewald, F. T. Pfeffer, J. N. Schachner, Wealth inequality and accumulation. *Annu. Rev. Sociol.* **43**, 379–404 (2017).
21. M. B. Mulder, S. Bowles, T. Hertz, A. Bell, J. Beise, G. Clark, I. Fazio, M. Gurven, K. Hill, P. L. Hooper, W. Irons, H. Kaplan, D. Leonetti, B. Low, F. Marlowe, R. McElreath, S. Naidu, D. Nolin, P. Piraino, R. Quinlan, E. Schniter, R. Sear, M. Shenk, E. A. Smith, C. von Rueden, P. Wiessner, Intergenerational wealth transmission and the dynamics of inequality in small-scale societies. *Science* **326**, 682–688 (2009).
22. B. Milanovic, P. H. Lindert, J. G. Williamson, Pre-industrial inequality. *Econ. J.* **121**, 255–272 (2011).
23. Y. Tao, X. Wu, T. Zhou, W. Yan, Y. Huang, H. Yu, B. Mondal, V. M. Yakovenko, Exponential structure of income inequality: Evidence from 67 countries. *J. Econ. Interact. Coord.* **14**, 345–376 (2019).
24. M. Nirei, W. Souma, A two factor model of income distribution dynamics. *Rev. Income Wealth* **53**, 440–459 (2007).
25. S. Goldrick-Rab, J. Richardson, A. Hernandez, *Hungry and Homeless in College: Results From a National Study of Basic Needs Insecurity in Higher Education* (2017); <http://wihopelab.com/publications/Hungry-and-Homeless-in-College-Report.pdf>.
26. R. J. Herrnstein, C. Murray, *The Bell Curve: Intelligence and Class Structure in American Life* (The Free Press, 1994).
27. S. R. Sirin, Socioeconomic status and academic achievement: A meta-analytic review of research. *Rev. Educ. Res.* **75**, 417–453 (2005).
28. E. W. Dillon, J. A. Smith, Determinants of the match between student ability and college quality. *J. Labor Econ.* **35**, 45–66 (2017).
29. A. Lareau, *Unequal Childhoods* (University of California Press, ed. 2, 2011).
30. A. G. Wilson, The use of the concept of entropy in system modelling. *J. Oper. Res. Soc.* **21**, 247–265 (1970).

31. J. Harte, *Maximum Entropy and Ecology: A Theory of Abundance, Distribution, and Energetics* (Oxford Univ. Press, 2011).
32. E. W. Montroll, On the entropy function in sociotechnical systems. *Proc. Natl. Acad. Sci. U.S.A.* **78**, 7839–7843 (1981).
33. A. De Martino, D. De Martino, An introduction to the maximum entropy approach and its application to inference problems in biology. *Heliyon* **4**, e00596 (2018).
34. A. Drăgulescu, V. M. Yakovenko, Statistical mechanics of money. *Eur. Phys. J. B.* **17**, 723–729 (2000).
35. L. Muchnik, S. Aral, S. J. Taylor, Social influence bias: A randomized experiment. *Science* **341**, 647–651 (2013).
36. V. M. Yakovenko, J. B. Rosser Jr, Colloquium: Statistical mechanics of money, wealth, and income. *Rev. Mod. Phys.* **81**, 1703–1725 (2009).
37. D. Easley, J. Kleinberg, *Networks, Crowds, and Markets: Reasoning About a Highly Connected World* (Cambridge Univ. Press, 2010); <https://www.cs.cornell.edu/home/kleinber/networks-book/>.
38. S. Reardon, in *Whither Opportunity? Rising Inequality and the Uncertain Life Chances of Low-Income Children*, R. Murnane, G. Duncan, Eds. (Russell Sage Foundation Press, 2011).
39. A. S. Morris, J. S. Silk, L. Steinberg, S. S. Myers, L. R. Robinson, The role of the family context in the development of emotion regulation. *Soc. Dev.* **16**, 361–388 (2007).
40. F. T. Pfeffer, A. Killewald, Generations of advantage. Multigenerational correlations in family wealth. *Soc. Forces* **96**, 1411–1442 (2018).
41. D. Jenkins, T. Ellwein, J. Wachen, M. R. Kerrigan, S.-W. Cho, *Achieving the Dream Colleges in Pennsylvania and Washington State: Early Progress toward Building a Culture of Evidence* (2009); <https://academiccommons.columbia.edu/doi/10.7916/D8445JKS>.
42. W. S. Moore, E. Lardner, G. Malnarich, M. Davis, *Rethinking Pre-College Math: Pedagogy, Professional Responsibility, and Student Success* (2013); <http://citeseerx.ist.psu.edu/viewdoc/download?doi=10.1.1.666.5369&rep=rep1&type=pdf>).
43. C. L. Quarles, M. Davis, Is learning in developmental math associated with community college outcomes? *Community Coll. Rev.* **45**, 33–51 (2017).
44. D. Starch, E. C. Elliott, Reliability of grading work in mathematics. *School Rev.* **21**, 254–259 (1913).
45. D. Starch, E. C. Elliott, Reliability of the grading of high-school work in English. *School Rev.* **20**, 442–457 (1912).
46. H. M. Brimi, Reliability of grading high school work in English. *Pract. Assess. Res. Eval.* **16**, 1–12 (2011).

47. S. A. Myers, A. Sharma, P. Gupta, J. Lin, Information network or social network? The structure of the twitter follow graph. *Proc. 23rd Int. Conf. World Wide Web*, 493–498 (2014).
48. D. De Solla Price, A general theory of bibliometric and other cumulative advantage processes. *J. Am. Soc. Inf. Sci.* **27**, 292–306 (1976).
49. A. Drăgulescu, V. M. Yakovenko, Exponential and power-law probability distributions of wealth and income in the United Kingdom and the United States. *Phys. A Stat. Mech. Appl.* **299**, 213–221 (2001).
50. Z. Kolenovic, D. Linderman, M. M. Karp, Improving student outcomes via comprehensive supports : Three-year outcomes from CUNY’s accelerated study in associate programs (ASAP). *Community Coll. Rev.* **41**, 271–291 (2013).
51. H. M. Levin, E. Garcia, Benefit-cost analysis of accelerated study in associate programs (ASAP) of the City University of New York (CUNY) (2013); [https://www1.nyc.gov/assets/opportunity/pdf/Levin\\_ASAP\\_Benefit\\_Cost\\_Report\\_FINAL\\_05212013.pdf](https://www1.nyc.gov/assets/opportunity/pdf/Levin_ASAP_Benefit_Cost_Report_FINAL_05212013.pdf).
52. C. T. Clotfelter, H. F. Ladd, C. G. Muschkin, J. L. Vigdor, Success in community college: Do institutions differ? *Res. High. Educ.* **54**, 805–824 (2013).
53. R Core Team, *R: A Language and Environment for Statistical Computing* (2018); <http://www.r-project.org/>.
54. T. W. Yee, *VGAM: Vector Generalized Linear and Additive Models* (2018); <https://cran.r-project.org/package=VGAM>.
55. P. M. Crosta, Intensity and attachment: How the chaotic enrollment patterns of community college students relate to educational outcomes. *Community Coll. Rev.* **42**, 118–142 (2014).
56. D. Chotikapanich, *Modeling Income Distributions and Lorenz Curves* (Springer, 2008).
57. F. Dyson, A meeting with Enrico Fermi. *Nature* **427**, 297 (2004).
58. D. Slottje, Modeling income distributions and Lorenz curves. *J. Econ. Inequal.* **8**, 525–526 (2010).
59. J. M. Henle, N. J. Horton, S. J. Jakus, Modelling inequality with a single parameter, in *Modeling Income Distributions and Lorenz Curves*, D. Chotikapanich, Ed. (Springer, 2008), pp. 255–269.
60. M. Levy, Are rich people smarter ? *J. Econ. Theory* **110**, 42–64 (2003).
61. O. S. Klass, O. Biham, M. Levy, O. Malcai, S. Solomon, The Forbes 400 and the Pareto wealth distribution. *Econ. Lett.* **90**, 290–295 (2006).
62. J. B. Davies, S. Sandström, A. Shorrocks, E. N. Wolff, *The World Distribution of Household Wealth* (2008).

63. A. Sala, H. Zheng, B. Zhao, S. Gaito, Brief announcement: Revisiting the power-law degree distribution for social graph analysis. *Proc. 29th ACM SIGACT-SIGOPS Symp. Princ. Distrib. Comput.*, 400–401 (2010).
64. A.-L. Barabási, R. Albert, Emergence of scaling in random networks. *Science* **286**, 509–512 (1999).
65. H. Ebel, L.-I. Mielsch, S. Bornholdt, Scale-free topology of e-mail networks. *Phys. Rev. E* **66**, 035103 (2002).
66. R. I. M. Dunbar, Neocortex size as a constraint on group size in primates. *J. Hum. Evol.* **22**, 469–493 (1992).
67. B. Gonçalves, N. Perra, A. Vespignani, Modeling users' activity on twitter networks: Validation of Dunbar's number. *PLOS ONE* **6**, e22656 (2011).
68. H.-Y. Chan, X. Wang, Momentum through course-completion patterns among 2-year college students beginning in STEM: Variations and contributing factors. *Res. High. Educ.* **59**, 704–743 (2018).
